# Supplementary material for: Multitrait genetic association analysis identifies 50 new risk loci for gastro-oesophageal reflux, seven new loci for Barrett’s oesophagus and provides insights into clinical heterogeneity in reflux diagnosis
Source: HighWire-hosted journal article supplement (doi:10.1136/gutjnl-2020-323906), 2021-06-29
Supplement: gutjnl-2020-323906supp002_data_supplement.pdf [file gutjnl-2020-323906supp002_data_supplement.pdf]

Supplementary Tables (ST1-18) for manuscript *Multi-trait Genetic Association Analysis identifies 50 new risk loci for gastroesophageal reflux, seven new loci for Barrett's esophagus and provides insights into clinical heterogeneity in reflux diagnosis*

## Contents

|                                                                                                                                           |    |
|-------------------------------------------------------------------------------------------------------------------------------------------|----|
| Brief overview .....                                                                                                                      | 3  |
| Important - Generic column names and abbreviations .....                                                                                  | 4  |
| ST1. Description of individual meta-GWAS study used for the multi-trait GWAS analysis for GERD.....                                       | 5  |
| ST2. Identified independent SNPs associated with GERD in the MTAG model and replication statistics in 23andMe.....                        | 6  |
| ST3. Association between genome-wide significant GERD loci with BMI, MDD and EDU. ....                                                    | 12 |
| ST4. MTAG Barrett Esophagus GWAS findings and replication analysis in 23andMe cohort.....                                                 | 16 |
| ST5. Comparison of MTAG BE loci effect sizes with and without depression and education attainment component in the multi-trait model..... | 19 |
| Important note for ST6-9 .....                                                                                                            | 21 |
| ST6(a). MTAG GERD metaXcan analysis using eQTL information from Gastro-esophageal junction tissue.....                                    | 22 |
| ST6(b). MTAG GERD metaXcan analysis using eQTL information from Esophageal Mucosa tissue .....                                            | 28 |
| ST6(c). MTAG GERD metaXcan analysis using eQTL information from Esophageal Muscularis tissue .....                                        | 34 |
| ST7. MultiXcan top associated genes with GERD susceptibility.....                                                                         | 40 |
| ST8(a). MTAG GERD metaXcan analysis using eQTL information from the Gastro-esophageal junction tissue.....                                | 56 |
| ST8(b). MTAG GERD metaXcan analysis using eQTL information from the Esophageal Muscularis tissue .....                                    | 57 |
| ST8(c). MTAG BE metaXcan analysis using eQTL information from the Esophageal Mucosa tissue .....                                          | 58 |
| ST9. MultiXcan top associated genes with BE susceptibility .....                                                                          | 59 |
| ST10. Selected candidate genome-wide GERD loci stratified into obesity-driven and depression-driven GERD genetic subgroups. ....          | 64 |

|                                                                                                                                         |     |
|-----------------------------------------------------------------------------------------------------------------------------------------|-----|
| ST11. Queried obesity-driven GERD gene in FUMA (gene2func) .....                                                                        | 67  |
| ST12. Queried depression-driven GERD gene in FUMA (gene2func).....                                                                      | 69  |
| ST13. Parameters for the Gene2func FUMA analysis for the subgroup GERD genes .....                                                      | 71  |
| ST14. Additional analysis - subgroup-specific GERD genes enrichment analysis (MAGMA).....                                               | 72  |
| ST15. GWAS Summary statistics for the 88 GERD loci on BE, EA and BEEA combined (BEACON, Cambridge, Bonn data).....                      | 108 |
| ST16. Estimation of the genetic heterogeneity in GERD effect sizes on BEEA via the Cochran Q statistics.....                            | 113 |
| ST17. Estimation of the genetic association between GERD loci and risk of BE/EA combined adjusting for the genetic association with BMI | 114 |
| ST18. Lookup on the genetic association of MTAG BE loci on GERD susceptibility .....                                                    | 115 |

**Brief overview**

| <b>Table Prefix</b> | <b>Description</b>                                                                                                                                        |
|---------------------|-----------------------------------------------------------------------------------------------------------------------------------------------------------|
| ST1                 | Description of individual meta-GWAS study used for the multi-trait GWAS analysis for GERD                                                                 |
| ST2                 | Identified independent SNPs associated with GERD in the MTAG model and replication statistics in 23andMe                                                  |
| ST3                 | Association between genome-wide significant GERD loci with BMI, MDD and EDU.                                                                              |
| ST4                 | Identified independent SNPs associated with Barrett Esophagus in the MTAG model and replication statistics in 23andMe                                     |
| ST5                 | Comparison of MTAG BE loci effect sizes with and without depression and education attainment component in the multi-trait model                           |
| ST6                 | MTAG GERD MetaXcan complete result using eQTL information from (a) Gastroesophageal Junction, (b) Esophageal Mucosa and (c) Esophageal Muscularis tissues |
| ST7                 | MTAG GERD MultiXcan complete result using weighted eQTL information across human tissues                                                                  |
| ST8                 | MTAG BE MetaXcan complete result using eQTL information from (a) Gastroesophageal Junction, (b) Esophageal Mucosa and (c) Esophageal Muscularis tissues   |
| ST9                 | MTAG BE MultiXcan complete result using weighted eQTL information across human tissues                                                                    |
| ST10                | Selected candidate genome-wide GERD loci stratified into obesity-driven and depression-driven GERD genetic subgroups                                      |
| ST11                | Mapped gene names for each putative obesity-driven GERD loci                                                                                              |
| ST12                | Mapped gene names for each putative depression-driven GERD loci                                                                                           |
| ST13                | Parameters for the FUMA gene2func analysis on genetic subgroups of obesity-driven and depression-driven GERD                                              |
| ST14                | Tissue enrichment analysis on subgroup-specific GERD genes using FUMA MAGMA                                                                               |
| ST15                | Association between genome-wide significant MTAG GERD loci with BMI, BE, EA and BEEA.                                                                     |
| ST16                | Estimation of the genetic heterogeneity in GERD effect sizes on BEEA via the Cochran Q statistics                                                         |
| ST17                | Estimation of the genetic association between GERD loci and risk of BE/EA combined adjusting for the genetic association with BMI                         |
| ST18                | Lookup on the genetic association of MTAG BE loci on GERD susceptibility                                                                                  |

**Important - Generic column names and abbreviations**

SNP=Single nucleotide polymorphism. Name usually given in RSID number (b37).

CHR=Chromosome of the SNP

BP=Basepair position of the SNP

EA=Effect allele (usually refers to as “A1” in most GWAS softwares)

NEA=Non-effect allele

EAF=Effect allele frequency

BETA=the magnitude association between the effect allele of the SNP and the trait of interest (GERD, BE, BMI etc)

23andMe= Estimates derived from the 23andMe cohort dataset

MTAG=Estimates derived from the MTAG model

Z=Z-score of the SNP association

Pval (or P)=Pvalue of the SNP association or the relevant test statistics unless otherwise stated.

**ST1. Description of individual meta-GWAS study used for the multi-trait GWAS analysis for GERD**

| Trait                       | PMID (if available) | Approx. effective N | Ncases | Ncontrols | Total* | Participating cohort studies, consortium.                             | Phenotype definition                                                                  |
|-----------------------------|---------------------|---------------------|--------|-----------|--------|-----------------------------------------------------------------------|---------------------------------------------------------------------------------------|
| <b>GERD</b>                 | 31527586            | 55600               | 78707  | 288734    | 367441 | UK Biobank, QSKIN. 23andMe cohort excluded.                           | use of GERD medication, ICD-10 records, clinical diagnosis and self-report            |
| <b>BE</b>                   | 31527586            | 8284                | 9680   | 31211     | 40891  | UK Biobank, BEACON, Bonn, Cambridge, Oxford.                          | ICD-10 records (for UK Biobank samples), pathological reports and clinical diagnosis. |
| <b>BMI</b>                  | 30124842            | 681275              | -      | -         | 681275 | UK Biobank, GIANT consortium                                          | Measurement                                                                           |
| <b>Education Attainment</b> | 30038396            | 766345              | -      | -         | 766345 | SSGAC                                                                 | self-report                                                                           |
| <b>MDD</b>                  | 30718901            | 107118              | 170756 | 329443    | 500199 | Psychiatric Genomics Consortium, UK Biobank. 23andMe cohort excluded. | self-report, ICD-10 records, DSM-IV/V criteria and clinical validation                |

\*Only participants of European descent were included.

**ST2. Identified independent SNPs associated with GERD in the MTAG model and replication statistics in 23andMe**

| <i>Main GERD MTAG analysis</i> |     |           |                          |                                 |    |     |      |        |           |        |                  | <i>Replication cohort (23andMe)</i> |            |                |              |            |
|--------------------------------|-----|-----------|--------------------------|---------------------------------|----|-----|------|--------|-----------|--------|------------------|-------------------------------------|------------|----------------|--------------|------------|
| SNP                            | CHR | BP        | MAGMA genes              | GENES eQTL                      | EA | NEA | EAF  | Orig Z | MTAG beta | MTAG z | mtag_GERD_Pvalue | 23andMe_NEA                         | 23andMe_EA | 23andMe_Pvalue | 23andMe_beta | 23andMe_se |
| rs12357321                     | 10  | 21790476  | NEBL                     | CASC10, SKIDA1, MLLT10, MIR1915 | G  | A   | 0.69 | -4.167 | -0.032    | -6.063 | 1.33E-09         | A                                   | G          | 1.83E-06       | -0.015       | 0.003      |
| rs1021363                      | 10  | 106610839 | SORCS3                   | SORCS3                          | A  | G   | 0.36 | 3.978  | 0.031     | 6.216  | 5.10E-10         | A                                   | G          | 3.34E-06       | -0.014       | 0.003      |
| rs761777                       | 10  | 134938075 | KNDC1                    | KNDC1                           | A  | G   | 0.75 | -4.665 | -0.035    | -6.228 | 4.71E-10         | A                                   | G          | 4.01E-09       | 0.022        | 0.004      |
| rs10837002                     | 11  | 38565727  |                          |                                 | C  | G   | 0.65 | -4.046 | -0.028    | -5.490 | 4.03E-08         | C                                   | G          | 6.85E-07       | 0.015        | 0.003      |
| rs7942368                      | 11  | 76465362  | TSKU                     | TSKU, GUCY2EP                   | C  | T   | 0.79 | 3.587  | 0.034     | 5.739  | 9.54E-09         | C                                   | T          | 7.14E-11       | -0.023       | 0.004      |
| rs10789931                     | 11  | 112842773 | NCAM1                    | NCAM1                           | C  | T   | 0.88 | -4.878 | -0.042    | -5.604 | 2.09E-08         | C                                   | T          | 0.000122123    | 0.018        | 0.005      |
| rs2734839                      | 11  | 113286490 | TTC12, ANKK1             | DRD2, ANKK1, MIR4301, TTC12     | C  | T   | 0.39 | 3.299  | 0.028     | 5.753  | 8.79E-09         | C                                   | T          | 1.68E-05       | -0.013       | 0.003      |
| rs1479405                      | 12  | 15387519  | RERG                     | RERG                            | C  | T   | 0.68 | -5.368 | -0.031    | -6.112 | 9.85E-10         | C                                   | T          | 3.16E-09       | 0.018        | 0.003      |
| rs773109                       | 12  | 56374695  | CDK2, SUOX, ERBB3, RAB5B | CDK2, SUOX                      | G  | A   | 0.66 | 5.417  | 0.038     | 7.459  | 8.71E-14         | A                                   | G          | 0.000110165    | 0.012        | 0.003      |
| rs324769                       | 12  | 83969240  |                          |                                 | C  | T   | 0.55 | 2.735  | 0.027     | 5.539  | 3.05E-08         | C                                   | T          | 3.75E-07       | -0.015       | 0.003      |
| rs1716171                      | 12  | 123716376 | MPHOSPH9, C12orf65       | C12orf65                        | C  | T   | 0.21 | -4.015 | -0.038    | -6.504 | 7.82E-11         | C                                   | T          | 1.78E-05       | 0.015        | 0.004      |
| rs9542729                      | 13  | 31833578  | B3GALTL                  | B3GALTL                         | C  | G   | 0.80 | 3.709  | 0.036     | 6.054  | 1.41E-09         | C                                   | G          | 0.00237389     | -0.011       | 0.004      |

|                |    |               |                                     |                                |   |   |      |        |            |        |          |   |   |                 |        |       |
|----------------|----|---------------|-------------------------------------|--------------------------------|---|---|------|--------|------------|--------|----------|---|---|-----------------|--------|-------|
| rs1334297      | 13 | 583353<br>75  | PCDH17                              | PCDH17                         | G | A | 0.27 | 3.308  | 0.039      | 7.112  | 1.14E-12 | A | G | 0.003729<br>455 | 0.010  | 0.003 |
| rs9540720      | 13 | 669227<br>05  | <b>PCDH9</b>                        | <b>PCDH9</b>                   | A | G | 0.52 | -3.951 | -<br>0.027 | -5.541 | 3.01E-08 | A | G | 3.32E-07        | 0.015  | 0.003 |
| rs9517313      | 13 | 991058<br>92  | STK24,<br>FARP1                     | STK24,<br>FARP1                | G | C | 0.62 | -4.199 | -<br>0.033 | -6.703 | 2.05E-11 | C | G | 9.77E-08        | -0.016 | 0.003 |
| rs957345       | 14 | 752760<br>79  | <b>YLPM1,<br/>PROX2,<br/>EIF2B2</b> | <b>YLPM1,<br/>PROX2</b>        | C | G | 0.46 | -4.087 | -<br>0.029 | -6.023 | 1.72E-09 | C | G | 1.43E-06        | 0.014  | 0.003 |
| rs1770193<br>4 | 14 | 893944<br>74  | TTC8                                |                                | T | C | 0.56 | 4.673  | 0.026      | 5.466  | 4.60E-08 | C | T | 0.087243<br>6   | 0.005  | 0.003 |
| rs942065       | 14 | 940320<br>65  | UNC79,<br>COX8C                     | UNC79                          | G | A | 0.37 | -3.484 | -<br>0.031 | -6.136 | 8.45E-10 | A | G | 5.83E-09        | -0.018 | 0.003 |
| rs1013311<br>1 | 14 | 103377<br>321 | TRAF3,<br>AMN                       | TRAF3,<br>AMN,<br>CDC42BP<br>B | G | A | 0.84 | -4.365 | -<br>0.042 | -6.421 | 1.35E-10 | A | G | 0.012570<br>332 | -0.010 | 0.004 |
| rs1164528<br>8 | 16 | 511726<br>77  | <b>SALL1</b>                        | <b>SALL1</b>                   | G | A | 0.81 | -4.311 | -<br>0.034 | -5.555 | 2.78E-08 | A | G | 0.781204<br>435 | 0.001  | 0.004 |
| rs9940128      | 16 | 538007<br>54  | FTO                                 | FTO                            | G | A | 0.58 | -0.577 | -<br>0.033 | -6.838 | 8.06E-12 | A | G | 2.06E-05        | -0.013 | 0.003 |
| rs1259891<br>6 | 16 | 606587<br>51  |                                     |                                | C | G | 0.73 | 5.175  | 0.033      | 6.169  | 6.87E-10 | C | G | 6.47E-05        | -0.013 | 0.003 |
| rs7206608      | 16 | 828726<br>28  | CDH13                               | CDH13,<br>LOC10192<br>8446     | C | G | 0.68 | -4.393 | -<br>0.029 | -5.666 | 1.46E-08 | C | G | 2.61E-05        | 0.013  | 0.003 |
| rs1245301<br>0 | 17 | 503161<br>31  | CA10                                |                                | C | T | 0.61 | -6.294 | -<br>0.030 | -6.020 | 1.75E-09 | C | T | 1.01E-13        | 0.022  | 0.003 |
| rs1296785<br>5 | 18 | 351382<br>45  | CELF4                               | CELF4                          | A | G | 0.33 | 3.964  | 0.037      | 7.119  | 1.09E-12 | A | G | 1.36E-13        | -0.023 | 0.003 |
| rs1431196      | 18 | 508321<br>02  | DCC                                 | DCC                            | A | G | 0.57 | -4.013 | -<br>0.032 | -6.665 | 2.65E-11 | A | G | 1.18E-06        | 0.014  | 0.003 |
| rs1942262      | 18 | 528733<br>17  | TCF4                                | TCF4                           | G | A | 0.71 | -4.742 | -<br>0.032 | -5.955 | 2.60E-09 | A | G | 0.001924<br>348 | -0.010 | 0.003 |
| rs7241572      | 18 | 775807<br>12  | KCNG2                               | KCNG2                          | G | A | 0.79 | -3.444 | -<br>0.037 | -6.118 | 9.49E-10 | A | G | 0.000172<br>186 | -0.014 | 0.004 |

|                |    |               |                                   |                           |   |   |      |        |            |        |          |   |   |                 |        |       |
|----------------|----|---------------|-----------------------------------|---------------------------|---|---|------|--------|------------|--------|----------|---|---|-----------------|--------|-------|
| rs9636202      | 19 | 184492<br>38  | PGPEP1                            | PGPEP1,<br>LSM4,<br>GDF15 | G | A | 0.73 | 4.476  | 0.035      | 6.404  | 1.51E-10 | A | G | 1.04E-14        | 0.026  | 0.003 |
| rs2023878      | 19 | 188341<br>24  | C19orf60<br>, CRTC1               | CRTC1                     | C | T | 0.81 | 5.887  | 0.036      | 5.930  | 3.04E-09 | C | T | 2.99E-11        | -0.025 | 0.004 |
| rs569356       | 1  | 291366<br>86  | OPRD1,<br>YTHDF2<br>, SESN2       | OPRD1,<br>YTHDF2          | A | G | 0.86 | 4.360  | 0.038      | 5.488  | 4.07E-08 | A | G | 0.015336<br>537 | -0.010 | 0.004 |
| rs3766823      | 1  | 321972<br>57  | COL16A<br>1                       | MIR4254                   | G | A | 0.83 | -4.605 | -<br>0.039 | -6.164 | 7.09E-10 | A | G | 2.30E-05        | -0.016 | 0.004 |
| rs2782641      | 1  | 440133<br>55  | ST3GAL<br>3,<br>CCDC24<br>, PTPRF | PTPRF                     | G | A | 0.39 | -3.195 | -<br>0.027 | -5.477 | 4.33E-08 | A | G | 0.798664<br>947 | -0.001 | 0.003 |
| rs1937450      | 1  | 664788<br>40  | PDE4B                             | PDE4B                     | T | G | 0.46 | -4.897 | -<br>0.032 | -6.519 | 7.07E-11 | G | T | 8.71E-05        | -0.012 | 0.003 |
| rs2815749      | 1  | 728147<br>83  | NEGR1                             |                           | A | G | 0.20 | -3.739 | -<br>0.039 | -6.456 | 1.07E-10 | A | G | 7.40E-12        | 0.026  | 0.004 |
| rs1737956<br>1 | 1  | 983401<br>39  | DPYD                              | DPYD                      | A | T | 0.86 | -5.359 | -<br>0.053 | -7.730 | 1.08E-14 | A | T | 0.001750<br>928 | 0.013  | 0.004 |
| rs861575       | 1  | 184725<br>099 | EDEM3                             | EDEM3,<br>FAM129A         | T | C | 0.58 | -4.637 | -<br>0.028 | -5.647 | 1.63E-08 | C | T | 0.080061<br>027 | -0.005 | 0.003 |
| rs7527682      | 1  | 189172<br>684 |                                   |                           | A | G | 0.46 | 4.839  | 0.027      | 5.534  | 3.13E-08 | A | G | 1.83E-05        | -0.013 | 0.003 |
| rs7541875      | 1  | 190957<br>589 |                                   |                           | A | G | 0.57 | -5.331 | -<br>0.027 | -5.649 | 1.61E-08 | A | G | 2.18E-09        | 0.018  | 0.003 |
| rs903678       | 1  | 201809<br>918 | NAV1,<br>LMOD1,<br>IPO9           | IPO9,<br>MIR1231          | G | A | 0.66 | -2.507 | -<br>0.028 | -5.455 | 4.89E-08 | A | G | 0.195211<br>75  | -0.004 | 0.003 |
| rs1883842      | 20 | 412230<br>62  | PTPRT                             | PTPRT                     | T | G | 0.72 | -4.809 | -<br>0.031 | -5.744 | 9.27E-09 | G | T | 1.11E-09        | -0.020 | 0.003 |
| rs2834005      | 21 | 342917<br>08  |                                   |                           | T | C | 0.69 | -4.376 | -<br>0.030 | -5.741 | 9.42E-09 | C | T | 0.002380<br>513 | -0.010 | 0.003 |
| rs2183588      | 21 | 426268<br>82  | BACE2                             | BACE2                     | A | G | 0.35 | -3.669 | -<br>0.029 | -5.697 | 1.22E-08 | A | G | 0.608676<br>54  | 0.002  | 0.003 |
| rs2838771      | 21 | 465015<br>76  | ADARB<br>1                        | ADARB1                    | G | C | 0.35 | 3.677  | 0.028      | 5.547  | 2.91E-08 | C | G | 3.32E-06        | 0.014  | 0.003 |

|            |    |           |                    |              |   |   |      |        |        |        |          |   |   |             |        |       |
|------------|----|-----------|--------------------|--------------|---|---|------|--------|--------|--------|----------|---|---|-------------|--------|-------|
| rs9615905  | 22 | 48875699  | FAM19A5            | FAM19A5      | C | T | 0.54 | -4.290 | -0.028 | -5.698 | 1.21E-08 | C | T | 4.67E-06    | 0.014  | 0.003 |
| rs4300861  | 2  | 22549441  |                    |              | C | T | 0.62 | -4.232 | 0.031  | -6.206 | 5.43E-10 | C | T | 0.05116689  | 0.006  | 0.003 |
| rs12997558 | 2  | 41704580  |                    |              | G | A | 0.64 | -3.864 | 0.028  | -5.539 | 3.04E-08 | A | G | 0.023923049 | -0.007 | 0.003 |
| rs1011407  | 2  | 60665768  | BCL11A             | BCL11A       | A | G | 0.88 | 3.767  | 0.042  | 5.716  | 1.09E-08 | A | G | 4.97E-05    | -0.019 | 0.005 |
| rs4851239  | 2  | 100489966 | LYG1, AFF3         | AFF3         | C | T | 0.62 | 6.221  | 0.033  | 6.635  | 3.24E-11 | C | T | 4.85E-09    | -0.018 | 0.003 |
| rs6711584  | 2  | 104421692 |                    |              | G | A | 0.55 | -3.957 | 0.032  | -6.664 | 2.66E-11 | A | G | 0.032727535 | -0.006 | 0.003 |
| rs13409451 | 2  | 144257639 | ARHGA P15          | ARHGAP15     | A | G | 0.61 | 3.012  | 0.028  | 5.618  | 1.93E-08 | A | G | 0.006388081 | -0.008 | 0.003 |
| rs2358016  | 2  | 162007430 | TANK               | TANK         | C | G | 0.50 | -3.714 | 0.028  | -5.877 | 4.17E-09 | C | G | NA          | 0.006  | 0.003 |
| rs1596747  | 2  | 193802478 |                    |              | A | G | 0.51 | -4.346 | 0.031  | -6.466 | 1.00E-10 | A | G | 1.71E-08    | 0.016  | 0.003 |
| rs7600261  | 2  | 212622818 | ERBB4              | ERBB4        | C | T | 0.69 | -3.614 | 0.034  | -6.475 | 9.47E-11 | C | T | 5.64E-07    | 0.016  | 0.003 |
| rs7612999  | 3  | 35678337  | ARPP21             | ARPP21       | G | A | 0.75 | -4.389 | 0.031  | -5.455 | 4.90E-08 | A | G | 0.396749529 | -0.003 | 0.003 |
| rs6441814  | 3  | 44049114  |                    |              | G | A | 0.53 | 4.630  | 0.028  | 5.890  | 3.86E-09 | A | G | 3.22E-09    | 0.017  | 0.003 |
| rs2240326  | 3  | 50128386  | RBM5, RBM6, AMT    | RBM5, RBM6   | G | A | 0.53 | 5.256  | 0.047  | 9.799  | 1.13E-22 | A | G | NA          | 0.011  | 0.009 |
| rs2016933  | 3  | 65653157  | <b>MAG11</b>       | <b>MAG11</b> | C | G | 0.27 | 4.097  | 0.031  | 5.724  | 1.04E-08 | C | G | 0.018477378 | -0.008 | 0.003 |
| rs6780459  | 3  | 104624105 | ALCAM              |              | A | T | 0.25 | -4.574 | 0.031  | -5.533 | 3.14E-08 | A | T | 0.004809081 | 0.010  | 0.003 |
| rs7685686  | 4  | 3207142   | GRK4, HTT, MSANTD1 | HTT, MSANTD1 | A | G | 0.58 | 2.519  | 0.028  | 5.708  | 1.14E-08 | A | G | 0.000916318 | -0.010 | 0.003 |
| rs2164300  | 4  | 67813017  |                    |              | C | T | 0.48 | 3.137  | 0.026  | 5.485  | 4.13E-08 | C | T | 2.70E-05    | -0.012 | 0.003 |

|                |   |               |                                                              |                                                 |   |   |      |        |            |        |          |   |   |                 |        |       |
|----------------|---|---------------|--------------------------------------------------------------|-------------------------------------------------|---|---|------|--------|------------|--------|----------|---|---|-----------------|--------|-------|
| rs7675588      | 4 | 807349<br>78  |                                                              | PCAT4                                           | C | A | 0.21 | 4.585  | 0.034      | 5.630  | 1.80E-08 | A | C | 7.96E-05        | 0.014  | 0.004 |
| rs920559       | 4 | 102218<br>715 | FLJ2002<br>1                                                 | PPP3CA                                          | C | G | 0.85 | -4.194 | -<br>0.038 | -5.607 | 2.06E-08 | C | G | 1.24E-09        | 0.025  | 0.004 |
| rs1310732<br>5 | 4 | 103188<br>709 | SLC39A<br>8                                                  | SLC39A8                                         | C | T | 0.93 | -4.616 | -<br>0.070 | -7.638 | 2.20E-14 | C | T | 6.45E-17        | 0.045  | 0.005 |
| rs1510719      | 4 | 140938<br>116 | MAML3                                                        | MAML3                                           | T | C | 0.62 | 5.861  | 0.039      | 7.860  | 3.84E-15 | C | T | 6.89E-05        | 0.012  | 0.003 |
| rs1001096<br>3 | 4 | 159839<br>313 | RAPGEF<br>2,<br>FNIP2,<br>C4orf45                            | FNIP2,<br>C4orf45                               | C | T | 0.38 | 2.760  | 0.027      | 5.454  | 4.92E-08 | C | T | 0.032678<br>313 | -0.006 | 0.003 |
| rs1592757      | 5 | 103889<br>998 |                                                              |                                                 | G | C | 0.64 | -2.453 | -<br>0.031 | -6.190 | 6.00E-10 | C | G | 0.035156<br>798 | -0.006 | 0.003 |
| rs1195306<br>1 | 5 | 120144<br>025 |                                                              |                                                 | C | T | 0.66 | -3.436 | -<br>0.028 | -5.536 | 3.10E-08 | C | T | 3.72E-06        | 0.014  | 0.003 |
| rs329122       | 5 | 133864<br>599 | JADE2                                                        | JADE2                                           | G | A | 0.58 | 3.774  | 0.029      | 5.929  | 3.05E-09 | A | G | 0.000283<br>336 | 0.011  | 0.003 |
| rs6939294      | 6 | 169506<br>31  |                                                              |                                                 | C | T | 0.77 | 4.083  | 0.036      | 6.314  | 2.71E-10 | C | T | 1.20E-05        | -0.015 | 0.003 |
| rs2145318      | 6 | 264966<br>03  | HMG4,<br>BTN2A1<br>,<br>BTN2A2<br>,<br>BTN1A1<br>,<br>BTN3A3 | HCG11,<br>HMG4,<br>BTN2A1,<br>BTN1A1,<br>BTN3A3 | T | A | 0.51 | -5.568 | -<br>0.035 | -7.347 | 2.03E-13 | A | T | 3.31E-08        | -0.016 | 0.003 |
| rs4713692      | 6 | 338076<br>38  |                                                              | MLN                                             | C | T | 0.63 | 3.202  | 0.028      | 5.538  | 3.07E-08 | C | T | 4.37E-06        | -0.014 | 0.003 |
| rs205262       | 6 | 345631<br>64  | UHRF1B<br>P1                                                 | SPDEF                                           | A | G | 0.73 | -4.777 | -<br>0.035 | -6.418 | 1.38E-10 | A | G | 1.36E-09        | 0.020  | 0.003 |
| rs9372625      | 6 | 983440<br>31  |                                                              |                                                 | G | A | 0.62 | 4.367  | 0.038      | 7.616  | 2.62E-14 | A | G | 2.33E-08        | 0.017  | 0.003 |
| rs9373363      | 6 | 143150<br>043 | <b>HIVEP2</b>                                                | <b>HIVEP2</b>                                   | A | G | 0.75 | 3.919  | 0.033      | 5.879  | 4.13E-09 | A | G | 5.42E-10        | -0.021 | 0.003 |
| rs1220471<br>4 | 6 | 152235<br>339 | ESR1                                                         | ESR1                                            | C | T | 0.37 | 3.280  | 0.029      | 5.770  | 7.92E-09 | C | T | NA              | -0.008 | 0.003 |

|            |   |           |                 |                 |   |   |      |        |        |        |          |   |   |             |        |       |
|------------|---|-----------|-----------------|-----------------|---|---|------|--------|--------|--------|----------|---|---|-------------|--------|-------|
| rs11762636 | 7 | 2061111   | FTSJ2, MADIL1   | MADIL1          | C | A | 0.82 | 5.006  | 0.051  | 8.229  | 1.88E-16 | A | C | 5.30E-11    | 0.024  | 0.004 |
| rs10242223 | 7 | 3521573   | SDK1            | SDK1            | A | G | 0.33 | 5.773  | 0.028  | 5.500  | 3.79E-08 | A | G | 4.01E-05    | -0.013 | 0.003 |
| rs2043539  | 7 | 12253880  | <b>TMEM106B</b> | <b>TMEM106B</b> | G | A | 0.58 | -3.056 | -0.027 | -5.592 | 2.24E-08 | A | G | 3.87E-05    | -0.012 | 0.003 |
| rs215614   | 7 | 32347335  | PDE1C           | PDE1C           | G | A | 0.37 | 4.396  | 0.033  | 6.601  | 4.08E-11 | A | G | 2.17E-06    | 0.014  | 0.003 |
| rs2396133  | 7 | 109197067 |                 |                 | A | G | 0.52 | -3.874 | 0.029  | -6.093 | 1.11E-09 | A | G | 1.95E-12    | 0.021  | 0.003 |
| rs2396766  | 7 | 114318071 | FOXP2           | FOXP2           | G | A | 0.53 | -5.345 | 0.032  | -6.683 | 2.33E-11 | A | G | 0.000170071 | -0.011 | 0.003 |
| rs2106353  | 7 | 126506598 | GRM8            | GRM8            | G | T | 0.77 | -5.502 | 0.037  | -6.419 | 1.37E-10 | G | T | 1.33E-06    | 0.017  | 0.004 |
| rs3863241  | 8 | 73890335  | TERF1           | TERF1, KCNB2    | C | T | 0.47 | -5.608 | 0.032  | -6.749 | 1.49E-11 | C | T | 0.000167602 | 0.011  | 0.003 |
| rs903959   | 8 | 142630782 |                 |                 | T | A | 0.60 | -3.742 | 0.029  | -5.932 | 2.99E-09 | A | T | 0.896580398 | 0.000  | 0.003 |
| rs3793577  | 9 | 23737627  | ELAVL2          | ELAVL2          | A | G | 0.46 | -4.063 | 0.027  | -5.574 | 2.49E-08 | A | G | 1.00E-05    | 0.017  | 0.004 |
| rs7032155  | 9 | 122672771 |                 |                 | C | A | 0.41 | -3.758 | 0.028  | -5.648 | 1.63E-08 | A | C | 0.026847471 | -0.007 | 0.003 |
| rs4382592  | 9 | 134870755 | MED27           | MED27           | T | G | 0.30 | 3.194  | 0.030  | 5.764  | 8.20E-09 | G | T | 0.365033828 | 0.003  | 0.003 |

**ST3. Association between genome-wide significant GERD loci with BMI, MDD and EDU.**

| SNP        | CHR | EA | NEA | EAF  | BMI_beta | BMI_P    | EDU_beta | EDU_P    | MDD_beta | MDD_P    |
|------------|-----|----|-----|------|----------|----------|----------|----------|----------|----------|
| rs569356   | 1   | A  | G   | 0.87 | -0.001   | 6.60E-01 | 0.011    | 1.53E-05 | 0.03     | 1.05E-02 |
| rs3766823  | 1   | A  | G   | 0.18 | 0.013    | 7.40E-07 | -0.016   | 3.27E-12 | 0.02     | 1.03E-01 |
| rs2782641  | 1   | A  | G   | 0.61 | 0.002    | 2.40E-01 | -0.017   | 4.22E-23 | 0.005    | 5.70E-01 |
| rs1937450  | 1   | T  | G   | 0.46 | -0.013   | 3.20E-11 | -0.006   | 2.35E-04 | -0.02    | 1.16E-02 |
| rs2815749  | 1   | A  | G   | 0.18 | -0.031   | 4.00E-37 | 0.002    | 2.76E-01 | -0.044   | 1.60E-05 |
| rs17379561 | 1   | A  | T   | 0.85 | -0.018   | 6.80E-11 | -0.019   | 1.73E-15 | 0.013    | 2.35E-01 |
| rs861575   | 1   | T  | C   | 0.59 | -0.008   | 8.60E-05 | -0.009   | 3.35E-07 | -0.011   | 1.51E-01 |
| rs7527682  | 1   | A  | G   | 0.47 | 0.004    | 5.10E-02 | 0.006    | 2.10E-04 | -0.003   | 7.39E-01 |
| rs7541875  | 1   | A  | G   | 0.59 | -0.006   | 3.20E-03 | -0.003   | 9.66E-02 | -0.005   | 5.03E-01 |
| rs903678   | 1   | A  | G   | 0.34 | 0.024    | 3.50E-31 | -0.011   | 1.54E-09 | 0.017    | 4.27E-02 |
| rs4300861  | 2   | T  | C   | 0.39 | 0.006    | 4.80E-03 | -0.008   | 6.24E-06 | 0.032    | 9.20E-05 |
| rs12997558 | 2   | A  | G   | 0.36 | 0.012    | 1.00E-08 | 0.008    | 2.87E-06 | 0.008    | 3.25E-01 |
| rs1011407  | 2   | A  | G   | 0.88 | 0.017    | 9.10E-09 | 0.014    | 1.05E-07 | 0.035    | 4.24E-03 |
| rs4851239  | 2   | T  | C   | 0.37 | -0.002   | 2.30E-01 | -0.01    | 4.45E-08 | -0.015   | 6.52E-02 |
| rs6711584  | 2   | A  | G   | 0.45 | 0.013    | 1.60E-11 | -0.01    | 2.12E-09 | 0.011    | 1.62E-01 |
| rs13409451 | 2   | A  | G   | 0.61 | 0.004    | 5.10E-02 | 0.016    | 1.59E-20 | 0.013    | 1.06E-01 |
| rs2358016  | 2   | C  | G   | 0.52 | -0.005   | 1.60E-02 | -0.016   | 7.43E-22 | 0        | 9.76E-01 |
| rs1596747  | 2   | A  | G   | 0.51 | -0.007   | 1.50E-04 | -0.012   | 3.42E-12 | -0.019   | 1.56E-02 |
| rs7600261  | 2   | T  | C   | 0.3  | 0.004    | 5.20E-02 | 0.014    | 2.41E-14 | 0.019    | 2.51E-02 |
| rs7612999  | 3   | A  | G   | 0.25 | 0.013    | 2.10E-08 | 0.009    | 7.57E-06 | 0.001    | 9.27E-01 |
| rs6441814  | 3   | A  | G   | 0.46 | -0.013   | 1.90E-10 | 0.003    | 4.18E-02 | -0.016   | 3.92E-02 |
| rs2240326  | 3   | A  | G   | 0.49 | -0.025   | 1.50E-37 | 0.02     | 1.80E-32 | -0.018   | 2.63E-02 |
| rs2016933  | 3   | C  | G   | 0.29 | 0.006    | 1.20E-02 | -0.01    | 1.02E-07 | 0.022    | 1.08E-02 |
| rs6780459  | 3   | A  | T   | 0.25 | -0.014   | 1.60E-09 | -0.005   | 9.38E-03 | -0.015   | 1.04E-01 |

|            |   |   |   |      |        |          |        |          |        |          |
|------------|---|---|---|------|--------|----------|--------|----------|--------|----------|
| rs7685686  | 4 | A | G | 0.57 | 0.007  | 5.20E-04 | 0.012  | 2.61E-12 | 0.011  | 1.69E-01 |
| rs2164300  | 4 | T | C | 0.51 | -0.011 | 6.80E-08 | -0.013 | 7.16E-14 | -0.016 | 4.51E-02 |
| rs7675588  | 4 | A | C | 0.79 | -0.014 | 1.50E-08 | 0.004  | 3.47E-02 | -0.015 | 1.11E-01 |
| rs920559   | 4 | C | G | 0.85 | -0.016 | 6.60E-09 | 0.005  | 5.41E-02 | -0.021 | 1.04E-01 |
| rs13107325 | 4 | T | C | 0.07 | 0.047  | 1.60E-36 | 0.019  | 4.45E-08 | -0.022 | 1.92E-01 |
| rs1510719  | 4 | T | C | 0.63 | 0.012  | 3.70E-09 | 0.01   | 1.69E-08 | 0.026  | 1.33E-03 |
| rs10010963 | 4 | T | C | 0.61 | -0.008 | 1.70E-04 | -0.011 | 1.83E-09 | -0.027 | 9.75E-04 |
| rs1592757  | 5 | C | G | 0.37 | 0.008  | 1.10E-04 | -0.01  | 5.89E-09 | 0.053  | 1.90E-10 |
| rs11953061 | 5 | T | C | 0.34 | 0.005  | 3.10E-02 | -0.011 | 3.78E-10 | 0.023  | 5.88E-03 |
| rs329122   | 5 | A | G | 0.42 | -0.014 | 8.40E-13 | -0.008 | 1.47E-06 | -0.026 | 1.30E-03 |
| rs6939294  | 6 | T | C | 0.23 | -0.008 | 9.30E-04 | -0.015 | 3.21E-13 | -0.015 | 1.06E-01 |
| rs2145318  | 6 | A | T | 0.49 | 0.003  | 1.40E-01 | 0.011  | 2.63E-10 | 0.032  | 5.20E-05 |
| rs4713692  | 6 | T | C | 0.34 | -0.012 | 7.50E-09 | -0.007 | 6.50E-05 | -0.007 | 3.80E-01 |
| rs205262   | 6 | A | G | 0.72 | -0.027 | 1.80E-35 | 0.006  | 3.05E-03 | 0.002  | 8.08E-01 |
| rs9372625  | 6 | A | G | 0.38 | -0.016 | 1.30E-14 | 0.024  | 6.76E-42 | 0.001  | 8.87E-01 |
| rs9373363  | 6 | A | G | 0.75 | 0.006  | 5.40E-03 | -0.009 | 1.14E-06 | 0.018  | 4.61E-02 |
| rs12204714 | 6 | T | C | 0.65 | -0.001 | 4.80E-01 | -0.015 | 3.51E-17 | -0.028 | 6.27E-04 |
| rs11762636 | 7 | A | C | 0.19 | -0.016 | 5.70E-10 | 0.018  | 6.93E-16 | -0.034 | 6.56E-04 |
| rs10242223 | 7 | A | G | 0.33 | -0.001 | 7.80E-01 | 0.006  | 1.26E-03 | 0.022  | 9.75E-03 |
| rs2043539  | 7 | A | G | 0.42 | 0.009  | 8.10E-06 | 0.004  | 3.92E-02 | 0.032  | 6.52E-05 |
| rs215614   | 7 | A | G | 0.64 | -0.016 | 1.90E-14 | -0.01  | 3.01E-09 | -0.02  | 1.60E-02 |
| rs2396133  | 7 | A | G | 0.52 | -0.01  | 3.10E-07 | 0.006  | 5.45E-04 | -0.028 | 3.69E-04 |
| rs2396766  | 7 | A | G | 0.45 | 0.013  | 1.40E-11 | -0.008 | 1.87E-06 | 0.016  | 4.16E-02 |
| rs2106353  | 7 | T | G | 0.22 | 0.004  | 6.80E-02 | 0.011  | 3.37E-08 | 0.009  | 3.60E-01 |
| rs3863241  | 8 | T | C | 0.54 | 0.009  | 2.30E-06 | -0.006 | 8.77E-04 | 0.021  | 7.08E-03 |
| rs903959   | 8 | A | T | 0.4  | 0.012  | 7.10E-09 | -0.016 | 2.02E-19 | -0.01  | 2.47E-01 |
| rs3793577  | 9 | A | G | 0.47 | 0.001  | 8.00E-01 | -0.007 | 2.69E-05 | -0.019 | 1.98E-02 |

|            |    |   |   |      |        |           |        |          |        |          |
|------------|----|---|---|------|--------|-----------|--------|----------|--------|----------|
| rs7032155  | 9  | A | C | 0.61 | 0.008  | 1.90E-04  | -0.007 | 1.04E-04 | 0.033  | 6.34E-05 |
| rs4382592  | 9  | T | G | 0.31 | 0.01   | 1.90E-06  | -0.016 | 1.01E-18 | 0.014  | 9.50E-02 |
| rs12357321 | 10 | A | G | 0.32 | 0.019  | 3.10E-19  | -0.008 | 8.31E-06 | 0.001  | 8.75E-01 |
| rs1021363  | 10 | A | G | 0.37 | 0.003  | 2.10E-01  | -0.008 | 8.53E-06 | 0.024  | 2.97E-03 |
| rs761777   | 10 | A | G | 0.72 | -0.009 | 9.20E-05  | -0.008 | 3.66E-05 | -0.024 | 1.77E-02 |
| rs10837002 | 11 | C | G | 0.65 | -0.009 | 2.00E-05  | 0.008  | 2.04E-05 | -0.014 | 1.02E-01 |
| rs7942368  | 11 | T | C | 0.22 | -0.015 | 3.10E-10  | -0.013 | 1.63E-09 | -0.027 | 5.22E-03 |
| rs10789931 | 11 | T | C | 0.12 | 0.007  | 2.60E-02  | 0.01   | 8.86E-05 | 0.031  | 1.18E-02 |
| rs2734839  | 11 | T | C | 0.6  | -0.008 | 1.60E-04  | -0.007 | 2.28E-05 | -0.027 | 7.21E-04 |
| rs1479405  | 12 | T | C | 0.33 | 0.008  | 3.70E-04  | 0.009  | 1.94E-07 | -0.003 | 7.53E-01 |
| rs773109   | 12 | A | G | 0.32 | -0.014 | 2.50E-11  | -0.016 | 2.00E-19 | -0.003 | 7.64E-01 |
| rs324769   | 12 | T | C | 0.45 | -0.005 | 6.40E-03  | -0.011 | 1.35E-10 | -0.015 | 6.24E-02 |
| rs1716171  | 12 | T | C | 0.79 | 0.003  | 3.00E-01  | -0.021 | 6.50E-24 | 0.024  | 2.79E-02 |
| rs9542729  | 13 | C | G | 0.8  | 0.002  | 3.70E-01  | 0.012  | 1.59E-08 | 0.032  | 1.24E-03 |
| rs1334297  | 13 | A | G | 0.73 | -0.011 | 4.30E-07  | 0.024  | 3.06E-37 | -0.023 | 8.27E-03 |
| rs9540720  | 13 | A | G | 0.51 | -0.007 | 4.80E-04  | -0.007 | 9.85E-05 | -0.016 | 4.35E-02 |
| rs9517313  | 13 | C | G | 0.37 | 0.01   | 3.50E-07  | 0.01   | 3.55E-08 | 0.012  | 1.51E-01 |
| rs957345   | 14 | C | G | 0.46 | -0.006 | 2.30E-03  | -0.006 | 5.56E-04 | -0.026 | 9.35E-04 |
| rs17701934 | 14 | T | C | 0.57 | 0.005  | 6.20E-03  | -0.005 | 1.68E-03 | 0.015  | 6.03E-02 |
| rs942065   | 14 | A | G | 0.64 | 0.02   | 2.80E-23  | 0.007  | 5.62E-05 | 0.016  | 5.00E-02 |
| rs10133111 | 14 | A | G | 0.17 | 0.021  | 3.50E-15  | 0.007  | 2.43E-03 | 0.018  | 8.92E-02 |
| rs11645288 | 16 | A | G | 0.2  | 0.002  | 3.40E-01  | 0.011  | 3.85E-07 | 0.033  | 9.94E-04 |
| rs9940128  | 16 | A | G | 0.42 | 0.074  | 1.30E-305 | 0.003  | 1.14E-01 | 0.021  | 8.29E-03 |
| rs12598916 | 16 | C | G | 0.73 | 0.003  | 1.90E-01  | 0.007  | 4.29E-04 | 0.024  | 6.02E-03 |
| rs7206608  | 16 | C | G | 0.69 | -0.013 | 2.30E-10  | -0.007 | 2.39E-04 | -0.01  | 2.31E-01 |
| rs12453010 | 17 | T | C | 0.39 | 0.003  | 9.20E-02  | 0.006  | 4.02E-04 | 0.011  | 1.82E-01 |
| rs12967855 | 18 | A | G | 0.33 | -0.004 | 4.70E-02  | 0.019  | 1.07E-26 | 0.027  | 1.25E-03 |

|           |    |   |   |      |        |          |        |          |        |          |
|-----------|----|---|---|------|--------|----------|--------|----------|--------|----------|
| rs1431196 | 18 | A | G | 0.56 | -0.002 | 3.70E-01 | -0.013 | 4.76E-14 | -0.031 | 8.37E-05 |
| rs1942262 | 18 | A | G | 0.3  | 0.002  | 4.40E-01 | 0.007  | 2.44E-04 | 0.024  | 4.79E-03 |
| rs7241572 | 18 | A | G | 0.19 | 0.005  | 3.10E-02 | 0.012  | 6.60E-09 | 0.035  | 5.90E-04 |
| rs9636202 | 19 | A | G | 0.26 | -0.018 | 2.00E-15 | -0.006 | 1.66E-03 | -0.013 | 1.69E-01 |
| rs2023878 | 19 | T | C | 0.19 | -0.02  | 2.50E-15 | 0.001  | 6.00E-01 | -0.007 | 4.64E-01 |
| rs1883842 | 20 | T | G | 0.73 | -0.003 | 1.50E-01 | -0.009 | 1.00E-06 | -0.008 | 3.48E-01 |
| rs2834005 | 21 | T | C | 0.69 | -0.006 | 3.60E-03 | 0.01   | 1.46E-07 | -0.018 | 3.31E-02 |
| rs2183588 | 21 | A | G | 0.35 | -0.012 | 1.90E-08 | -0.013 | 1.46E-13 | 0.003  | 7.17E-01 |
| rs2838771 | 21 | C | G | 0.65 | -0.014 | 3.60E-12 | 0.007  | 2.11E-04 | -0.022 | 7.02E-03 |
| rs9615905 | 22 | T | C | 0.45 | 0.012  | 4.60E-09 | -0.007 | 1.45E-04 | 0.003  | 6.80E-01 |

**ST4. MTAG Barrett Esophagus GWAS findings and replication analysis in 23andMe cohort**

| Locus number | SNP        | CHR | BP        | E A | NE A | EA F | Mtag beta | mtag_z | mtag_pval | In Gharahkhani et al. 2016 | LD with GERD | 23andMe NEA/EA | 23andMe EAF | 23andMe pvalue | Rep | 23andMe BETA | 23andMe SE |
|--------------|------------|-----|-----------|-----|------|------|-----------|--------|-----------|----------------------------|--------------|----------------|-------------|----------------|-----|--------------|------------|
| 1            | rs3072     | 2   | 20878406  | T   | C    | 0.63 | 0.113     | -7.14  | 9.29E-13  | YES                        |              | C/T            | 0.62        | 6.95E-10       | YES | -0.061       | 0.010      |
| 1            | rs7255     | 2   | 20878820  | T   | C    | 0.45 | 0.107     | 6.95   | 3.75E-12  | x                          |              | C/T            | 0.47        | 2.16E-10       | YES | 0.061        | 0.010      |
| 1            | rs10199768 | 2   | 21244000  | G   | T    | 0.55 | 0.085     | 5.56   | 2.62E-08  | x                          |              | G/T            | 0.43        | 1.06E-04       | YES | -0.038       | 0.010      |
| 1            | rs520354   | 2   | 21259612  | A   | G    | 0.53 | 0.090     | -5.97  | 2.44E-09  | x                          |              | A/G            | 0.46        | 8.96E-04       | YES | 0.032        | 0.010      |
| 2            | rs17369434 | 2   | 56004396  | A   | G    | 0.92 | 0.178     | -6.16  | 7.34E-10  | NEW                        |              | A/G            | 0.07        | 8.53E-01       | NO  | 0.003        | 0.018      |
| 2            | rs10207635 | 2   | 56040035  | A   | T    | 0.87 | 0.136     | -6.18  | 6.34E-10  | x                          |              | A/T            | 0.13        | 1.45E-01       | NO  | 0.021        | 0.014      |
| 3            | rs2861695  | 2   | 67846727  | A   | G    | 0.19 | 0.110     | 5.81   | 6.23E-09  | NEW                        |              | A/G            | 0.80        | 8.90E-08       | YES | -0.064       | 0.012      |
| 4            | rs1868915  | 2   | 200015561 | C   | A    | 0.41 | 0.091     | -5.91  | 3.51E-09  | YES                        |              | A/C            | 0.43        | 2.31E-12       | YES | -0.068       | 0.010      |
| 5            | rs2597301  | 3   | 70909494  | C   | G    | 0.31 | 0.119     | 7.32   | 2.56E-13  | YES                        |              | C/G            | 0.68        | 1.59E-07       | YES | -0.054       | 0.010      |
| 5            | rs2077610  | 3   | 70911271  | T   | A    | 0.45 | 0.095     | 6.15   | 7.84E-10  | x                          |              | A/T            | 0.46        | 1.43E-06       | YES | 0.047        | 0.010      |
| 6            | rs10080150 | 5   | 593160    | A   | G    | 0.62 | 0.094     | -6.06  | 1.33E-09  | NEW                        |              | A/G            | 0.37        | 3.77E-09       | YES | 0.058        | 0.010      |
| 7            | rs10039754 | 5   | 28986950  | A   | G    | 0.45 | 0.085     | -5.65  | 1.63E-08  | NEW                        |              | A/G            | 0.54        | 6.70E-04       | YES | 0.033        | 0.010      |

|    |                |    |               |   |   |          |           |       |              |     |               |     |      |              |          |        |       |
|----|----------------|----|---------------|---|---|----------|-----------|-------|--------------|-----|---------------|-----|------|--------------|----------|--------|-------|
| 8  | rs93937<br>35  | 6  | 2658232<br>7  | A | G | 0.8<br>6 | 0.13<br>5 | 6.11  | 9.70E-<br>10 | x   |               | A/G | 0.12 | 9.35E-<br>01 | NO       | -0.001 | 0.015 |
| 8  | rs12215<br>773 | 6  | 2703923<br>3  | T | C | 0.7<br>7 | 0.10<br>3 | 5.67  | 1.45E-<br>08 | NEW | rs21453<br>18 | C/T | 0.81 | 1.11E-<br>02 | NO       | 0.031  | 0.012 |
| 8  | rs13219<br>181 | 6  | 2713622<br>5  | A | G | 0.8<br>1 | 0.10<br>7 | 5.44  | 5.23E-<br>08 | x   |               | A/G | 0.16 | 1.67E-<br>01 | NO       | -0.018 | 0.013 |
| 8  | rs13195<br>040 | 6  | 2741392<br>4  | A | G | 0.8<br>9 | 0.15<br>9 | 6.45  | 1.14E-<br>10 | x   |               | A/G | 0.08 | NA           | NO       | -0.031 | 0.065 |
| 8  | rs20096<br>8   | 6  | 2785956<br>8  | T | C | 0.8<br>0 | 0.11<br>1 | 5.71  | 1.14E-<br>08 | x   |               | C/T | 0.84 | 1.13E-<br>02 | NO       | 0.034  | 0.013 |
| 8  | rs77524<br>48  | 6  | 2830109<br>9  | A | G | 0.8<br>7 | 0.13<br>5 | 5.82  | 5.83E-<br>09 | x   |               | A/G | 0.10 | 7.01E-<br>01 | NO       | -0.006 | 0.016 |
| 9  | rs62221<br>7   | 6  | 1607667<br>70 | T | C | 0.5<br>2 | 0.09<br>3 | 6.17  | 6.94E-<br>10 | NEW |               | C/T | 0.50 | 3.28E-<br>04 | YES<br>S | 0.035  | 0.010 |
| 9  | rs25049<br>30  | 6  | 1608452<br>19 | T | C | 0.2<br>0 | 0.10<br>7 | -5.75 | 8.95E-<br>09 | x   |               | C/T | 0.21 | 2.71E-<br>01 | NO       | -0.013 | 0.012 |
| 10 | rs48412<br>11  | 8  | 9599512       | A | G | 0.2<br>6 | 0.09<br>6 | 5.55  | 2.83E-<br>08 | YES |               | A/G | 0.75 | 3.59E-<br>02 | NO       | -0.023 | 0.011 |
| 10 | rs10104<br>032 | 8  | 9616664       | C | A | 0.6<br>3 | 0.09<br>0 | -5.75 | 8.73E-<br>09 | x   |               | A/C | 0.63 | NA           | NO       | -0.030 | 0.010 |
| 11 | rs21271<br>28  | 8  | 1143492<br>9  | C | T | 0.3<br>3 | 0.08<br>8 | 5.49  | 4.07E-<br>08 | x   |               | C/T | 0.68 | 6.00E-<br>06 | YES<br>S | -0.046 | 0.010 |
| 11 | rs10108<br>511 | 8  | 1143551<br>6  | T | C | 0.4<br>7 | 0.08<br>7 | 5.77  | 8.08E-<br>09 | YES |               | C/T | 0.46 | 1.64E-<br>07 | YES<br>S | 0.050  | 0.010 |
| 12 | rs10982<br>622 | 9  | 1003045<br>31 | A | G | 0.5<br>4 | 0.08<br>8 | 5.76  | 8.59E-<br>09 | YES |               | A/G | 0.47 | 2.07E-<br>09 | YES<br>S | -0.058 | 0.010 |
| 13 | rs11792<br>928 | 9  | 1294015<br>50 | C | T | 0.7<br>1 | 0.09<br>8 | -5.89 | 3.85E-<br>09 | NEW |               | C/T | 0.29 | 9.28E-<br>04 | YES<br>S | 0.035  | 0.011 |
| 14 | rs12479<br>42  | 12 | 1146737<br>23 | G | C | 0.5<br>9 | 0.09<br>9 | 6.41  | 1.45E-<br>10 | YES |               | C/G | 0.60 | 4.13E-<br>07 | YES<br>S | 0.050  | 0.010 |
| 15 | rs44489<br>48  | 16 | 7256923<br>6  | A | T | 0.9<br>2 | 0.15<br>7 | 5.49  | 4.02E-<br>08 | x   |               | A/T | 0.06 | 2.44E-<br>01 | NO       | -0.023 | 0.020 |
| 15 | rs73941<br>4   | 16 | 7309795<br>6  | C | T | 0.2<br>6 | 0.10<br>3 | 5.82  | 5.77E-<br>09 | NEW |               | C/T | 0.74 | 1.93E-<br>05 | YES<br>S | -0.046 | 0.011 |

|    |                |    |              |   |   |          |           |      |              |     |               |     |      |              |         |        |       |
|----|----------------|----|--------------|---|---|----------|-----------|------|--------------|-----|---------------|-----|------|--------------|---------|--------|-------|
| 16 | rs71873<br>65  | 16 | 8651191<br>5 | T | C | 0.1<br>8 | 0.11<br>3 | 5.78 | 7.52E-<br>09 | NEW |               | C/T | 0.18 | 4.28E-<br>04 | YE<br>S | 0.044  | 0.012 |
| 17 | rs12985<br>909 | 19 | 1843938<br>3 | C | T | 0.4<br>5 | 0.08<br>6 | 5.61 | 2.03E-<br>08 | x   |               | C/T | 0.54 | 2.67E-<br>06 | YE<br>S | -0.046 | 0.010 |
| 17 | rs81020<br>46  | 19 | 1879557<br>8 | T | G | 0.4<br>4 | 0.09<br>6 | 6.30 | 2.97E-<br>10 | x   |               | G/T | 0.45 | NA           | NO      | 0.077  | 0.010 |
| 17 | rs72587<br>22  | 19 | 1880891<br>5 | T | A | 0.6<br>0 | 0.09<br>6 | 6.17 | 6.69E-<br>10 | YES | rs20238<br>78 | A/T | 0.60 | 7.68E-<br>11 | YE<br>S | 0.066  | 0.010 |

For the column "In Gharakhani et al. 2016", entries with "x" are ignored as the same loci have been tagged by another SNP in high LD from the same locues (see locus number).

### ST5. Comparison of MTAG BE loci effect sizes with and without depression and education attainment component in the multi-trait model

| MTAG BE+BMI+GERD only |     |         |    |     |       |         |      |        |       |       |          | MTAG BE+BMI+MDD+EDU+GERD |       |       |          |
|-----------------------|-----|---------|----|-----|-------|---------|------|--------|-------|-------|----------|--------------------------|-------|-------|----------|
| SNP                   | CHR | BP      | EA | NEA | Z     | N       | FRQ  | Beta   | SE    | Z     | Pval     | Beta                     | SE    | Z     | Pval     |
| rs1247942             | 12  | 1.1E+08 | G  | C   | 6.48  | 6331.32 | 0.59 | 0.099  | 0.015 | 6.41  | 1.45E-10 | 0.096                    | 0.015 | 6.26  | 3.81E-10 |
| rs4448948             | 16  | 7.3E+07 | A  | T   | 4.87  | 5816.35 | 0.92 | 0.157  | 0.029 | 5.49  | 4.02E-08 | 0.159                    | 0.029 | 5.57  | 2.53E-08 |
| rs739414              | 16  | 7.3E+07 | C  | T   | 5.02  | 5920.71 | 0.26 | 0.103  | 0.018 | 5.82  | 5.77E-09 | 0.101                    | 0.018 | 5.74  | 9.74E-09 |
| rs7187365             | 16  | 8.7E+07 | T  | C   | 5.11  | 6546.58 | 0.18 | 0.113  | 0.020 | 5.78  | 7.52E-09 | 0.111                    | 0.020 | 5.70  | 1.20E-08 |
| rs12985909            | 19  | 1.8E+07 | C  | T   | 3.99  | 6158.4  | 0.45 | 0.086  | 0.015 | 5.61  | 2.03E-08 | 0.087                    | 0.015 | 5.67  | 1.44E-08 |
| rs8102046             | 19  | 1.9E+07 | T  | G   | 4.89  | 6392.6  | 0.44 | 0.096  | 0.015 | 6.30  | 2.97E-10 | 0.092                    | 0.015 | 6.07  | 1.31E-09 |
| rs7258722             | 19  | 1.9E+07 | T  | A   | 4.20  | 6295.73 | 0.60 | 0.096  | 0.015 | 6.17  | 6.69E-10 | 0.092                    | 0.015 | 5.98  | 2.24E-09 |
| rs3072                | 2   | 2.1E+07 | T  | C   | -5.97 | 6217.95 | 0.63 | -0.113 | 0.016 | -7.14 | 9.29E-13 | -0.110                   | 0.016 | -7.01 | 2.31E-12 |
| rs7255                | 2   | 2.1E+07 | T  | C   | 5.99  | 6176.51 | 0.45 | 0.107  | 0.015 | 6.95  | 3.75E-12 | 0.105                    | 0.015 | 6.87  | 6.30E-12 |
| rs10199768            | 2   | 2.1E+07 | G  | T   | 4.13  | 6235.76 | 0.55 | 0.085  | 0.015 | 5.56  | 2.62E-08 | 0.083                    | 0.015 | 5.45  | 4.97E-08 |
| rs520354              | 2   | 2.1E+07 | A  | G   | -4.46 | 6336.37 | 0.53 | -0.090 | 0.015 | -5.97 | 2.44E-09 | -0.088                   | 0.015 | -5.80 | 6.71E-09 |
| rs17369434            | 2   | 5.6E+07 | A  | G   | -5.19 | 6167.13 | 0.92 | -0.178 | 0.029 | -6.16 | 7.34E-10 | -0.177                   | 0.029 | -6.14 | 8.06E-10 |
| rs10207635            | 2   | 5.6E+07 | A  | T   | -5.20 | 6401.44 | 0.87 | -0.136 | 0.022 | -6.18 | 6.34E-10 | -0.137                   | 0.022 | -6.21 | 5.19E-10 |
| rs2861695             | 2   | 6.8E+07 | A  | G   | 3.90  | 6550.76 | 0.19 | 0.110  | 0.019 | 5.81  | 6.23E-09 | 0.107                    | 0.019 | 5.69  | 1.28E-08 |
| rs1868915             | 2   | 2E+08   | C  | A   | -5.92 | 6293.51 | 0.41 | -0.091 | 0.015 | -5.91 | 3.51E-09 | -0.089                   | 0.015 | -5.82 | 5.86E-09 |
| rs2597301             | 3   | 7.1E+07 | C  | G   | 6.03  | 6458.9  | 0.31 | 0.119  | 0.016 | 7.32  | 2.56E-13 | 0.114                    | 0.016 | 7.04  | 1.92E-12 |
| rs2077610             | 3   | 7.1E+07 | T  | A   | 5.47  | 6101.71 | 0.45 | 0.095  | 0.015 | 6.15  | 7.84E-10 | 0.092                    | 0.015 | 5.99  | 2.07E-09 |
| rs10080150            | 5   | 593160  | A  | G   | -4.89 | 6358.02 | 0.62 | -0.094 | 0.016 | -6.06 | 1.33E-09 | -0.091                   | 0.016 | -5.88 | 4.00E-09 |
| rs10039754            | 5   | 2.9E+07 | A  | G   | -4.37 | 6448.7  | 0.45 | -0.085 | 0.015 | -5.65 | 1.63E-08 | -0.084                   | 0.015 | -5.57 | 2.59E-08 |
| rs9393735             | 6   | 2.7E+07 | A  | G   | 5.10  | 5945.45 | 0.86 | 0.135  | 0.022 | 6.11  | 9.70E-10 | 0.139                    | 0.022 | 6.32  | 2.69E-10 |

|            |   |         |   |   |       |         |      |        |       |       |          |  |        |       |       |          |
|------------|---|---------|---|---|-------|---------|------|--------|-------|-------|----------|--|--------|-------|-------|----------|
| rs12215773 | 6 | 2.7E+07 | T | C | 3.80  | 6052.84 | 0.77 | 0.103  | 0.018 | 5.67  | 1.45E-08 |  | 0.107  | 0.018 | 5.88  | 4.21E-09 |
| rs13219181 | 6 | 2.7E+07 | A | G | 4.03  | 6049.62 | 0.81 | 0.107  | 0.020 | 5.44  | 5.23E-08 |  | 0.109  | 0.020 | 5.58  | 2.47E-08 |
| rs13195040 | 6 | 2.7E+07 | A | G | 5.36  | 5621.96 | 0.89 | 0.159  | 0.025 | 6.45  | 1.14E-10 |  | 0.162  | 0.025 | 6.60  | 4.11E-11 |
| rs200968   | 6 | 2.8E+07 | T | C | 4.08  | 5930.44 | 0.80 | 0.111  | 0.019 | 5.71  | 1.14E-08 |  | 0.113  | 0.019 | 5.81  | 6.17E-09 |
| rs7752448  | 6 | 2.8E+07 | A | G | 4.49  | 5843.54 | 0.87 | 0.135  | 0.023 | 5.82  | 5.83E-09 |  | 0.136  | 0.023 | 5.89  | 3.86E-09 |
| rs622217   | 6 | 1.6E+08 | T | C | 5.81  | 6392.32 | 0.52 | 0.093  | 0.015 | 6.17  | 6.94E-10 |  | 0.091  | 0.015 | 6.06  | 1.37E-09 |
| rs2504930  | 6 | 1.6E+08 | T | C | -5.38 | 6397.77 | 0.20 | -0.107 | 0.019 | -5.75 | 8.95E-09 |  | -0.106 | 0.019 | -5.68 | 1.35E-08 |
| rs48412112 | 8 | 9599512 | A | G | 5.33  | 6445.13 | 0.26 | 0.096  | 0.017 | 5.55  | 2.83E-08 |  | 0.098  | 0.017 | 5.68  | 1.32E-08 |
| rs10104032 | 8 | 9616664 | C | A | -5.43 | 6371.05 | 0.63 | -0.090 | 0.016 | -5.75 | 8.73E-09 |  | -0.093 | 0.016 | -5.95 | 2.63E-09 |
| rs2127128  | 8 | 1.1E+07 | C | T | 5.89  | 6331.02 | 0.33 | 0.088  | 0.016 | 5.49  | 4.07E-08 |  | 0.088  | 0.016 | 5.47  | 4.49E-08 |
| rs10108511 | 8 | 1.1E+07 | T | C | 6.21  | 6407.11 | 0.47 | 0.087  | 0.015 | 5.77  | 8.08E-09 |  | 0.086  | 0.015 | 5.70  | 1.22E-08 |
| rs10982622 | 9 | 1E+08   | A | G | 6.12  | 6278.76 | 0.54 | 0.088  | 0.015 | 5.76  | 8.59E-09 |  | 0.085  | 0.015 | 5.63  | 1.76E-08 |
| rs11792928 | 9 | 1.3E+08 | C | T | -5.23 | 6261    | 0.71 | -0.098 | 0.017 | -5.89 | 3.85E-09 |  | -0.098 | 0.017 | -5.88 | 4.16E-09 |

**Important note for ST6-9**

Data from ST6,ST7,St8,ST9 are generated from the metaXcan and multiXcan software. It is important to review the software manuals prior to interpreting these results. Please refer to <https://github.com/hakyimlab/MetaXcan> for specific description of column headers.

**ST6(a). MTAG GERD metaXcan analysis using eQTL information from Gastro-esophageal junction tissue**

| Gene ID                | Gene name         | Z         | Effect size | Pval         | Var_g | pred_perf_r2 | pred_perf_pval | pred_perf_qval | n_snps_unsed | n_snps_in_cov | n_snps_in_model |
|------------------------|-------------------|-----------|-------------|--------------|-------|--------------|----------------|----------------|--------------|---------------|-----------------|
| ENSG0000000453<br>4.10 | RBM6              | -<br>9.78 | -0.08       | 1.33E-<br>22 | 0.16  | 0.33         | 8.24E-19       | NA             | 43           | 65            | 65              |
| ENSG0000016406<br>8.11 | RNF123            | 7.60      | 0.46        | 2.96E-<br>14 | 0.00  | 0.05         | 0.003753       | NA             | 3            | 22            | 22              |
| ENSG0000013953<br>1.8  | SUOX              | 7.35      | 0.18        | 2.04E-<br>13 | 0.02  | 0.16         | 1.57E-08       | NA             | 9            | 18            | 18              |
| ENSG0000019772<br>8.5  | RPS26             | -<br>6.90 | -0.06       | 5.35E-<br>12 | 0.16  | 0.69         | 9.22E-55       | NA             | 23           | 33            | 33              |
| ENSG0000022484<br>3.2  | LINC0024<br>0     | -<br>6.44 | -0.14       | 1.21E-<br>10 | 0.03  | 0.04         | 0.008003       | NA             | 6            | 8             | 8               |
| ENSG0000005182<br>5.10 | MPHOSP<br>H9      | -<br>6.14 | -0.10       | 8.06E-<br>10 | 0.05  | 0.13         | 2.61E-07       | NA             | 14           | 17            | 17              |
| ENSG0000011234<br>3.8  | TRIM38            | 5.96      | 0.14        | 2.56E-<br>09 | 0.02  | 0.13         | 4.55E-07       | NA             | 12           | 18            | 18              |
| ENSG0000016381<br>2.9  | ZDHHC3            | -<br>5.67 | -0.12       | 1.41E-<br>08 | 0.03  | 0.05         | 0.00218        | NA             | 8            | 13            | 13              |
| ENSG0000006506<br>0.12 | UHRF1BP<br>1      | 5.50      | 0.03        | 3.72E-<br>08 | 0.28  | 0.48         | 5.96E-30       | NA             | 65           | 75            | 75              |
| ENSG0000017354<br>0.8  | GMPPB             | 5.46      | 0.12        | 4.65E-<br>08 | 0.03  | 0.12         | 1.53E-06       | NA             | 13           | 19            | 19              |
| ENSG0000017814<br>9.12 | DALRD3            | -<br>5.28 | -0.16       | 1.31E-<br>07 | 0.01  | 0.08         | 0.000154       | NA             | 5            | 9             | 9               |
| ENSG0000018395<br>5.8  | SETD8             | -<br>5.27 | -0.13       | 1.38E-<br>07 | 0.02  | 0.04         | 0.004652       | NA             | 5            | 6             | 6               |
| ENSG0000011640<br>6.14 | EDEM3             | -<br>5.16 | -0.06       | 2.47E-<br>07 | 0.10  | 0.20         | 3.74E-11       | NA             | 14           | 17            | 17              |
| ENSG0000027287<br>1.1  | RP11-<br>408A13.4 | 5.10      | 0.09        | 3.35E-<br>07 | 0.04  | 0.06         | 0.000841       | NA             | 9            | 10            | 10              |
| ENSG0000014502<br>0.10 | AMT               | -<br>5.09 | -0.06       | 3.51E-<br>07 | 0.08  | 0.30         | 3.54E-16       | NA             | 25           | 32            | 32              |

|                        |                |           |       |              |      |      |          |    |    |    |    |
|------------------------|----------------|-----------|-------|--------------|------|------|----------|----|----|----|----|
| ENSG0000012396<br>5.12 | PMS2P5         | -<br>5.00 | -0.15 | 5.88E-<br>07 | 0.01 | 0.18 | 1.59E-09 | NA | 1  | 7  | 7  |
| ENSG0000020443<br>8.6  | GPANK1         | 4.94      | 0.25  | 7.91E-<br>07 | 0.00 | 0.12 | 2.00E-06 | NA | 3  | 46 | 46 |
| ENSG0000011132<br>8.2  | CDK2AP1        | 4.93      | 0.08  | 8.08E-<br>07 | 0.05 | 0.17 | 3.01E-09 | NA | 26 | 40 | 40 |
| ENSG0000020436<br>6.3  | ZBTB12         | 4.92      | 0.16  | 8.49E-<br>07 | 0.01 | 0.11 | 4.36E-06 | NA | 7  | 53 | 53 |
| ENSG0000015919<br>9.9  | ATP5G1         | 4.80      | 0.09  | 1.60E-<br>06 | 0.03 | 0.06 | 0.000595 | NA | 9  | 12 | 12 |
| ENSG0000015206<br>1.17 | RABGAP<br>1L   | -<br>4.76 | -0.05 | 1.93E-<br>06 | 0.13 | 0.29 | 1.59E-15 | NA | 25 | 29 | 29 |
| ENSG0000016708<br>1.12 | PBX3           | -<br>4.72 | -0.05 | 2.32E-<br>06 | 0.10 | 0.29 | 3.76E-16 | NA | 13 | 15 | 15 |
| ENSG0000007513<br>1.5  | TIPIN          | 4.72      | 0.04  | 2.34E-<br>06 | 0.15 | 0.22 | 6.09E-12 | NA | 56 | 63 | 63 |
| ENSG0000023185<br>2.2  | CYP21A2        | 4.69      | 0.11  | 2.78E-<br>06 | 0.02 | 0.03 | 0.01231  | NA | 6  | 32 | 32 |
| ENSG0000018647<br>0.9  | BTN3A2         | 4.68      | 0.03  | 2.90E-<br>06 | 0.29 | 0.50 | 1.06E-31 | NA | 28 | 31 | 31 |
| ENSG0000025453<br>1.1  | AP001816<br>.1 | -<br>4.66 | -0.04 | 3.20E-<br>06 | 0.14 | 0.19 | 4.71E-10 | NA | 60 | 68 | 68 |
| ENSG0000024829<br>0.1  | TNXA           | 4.52      | 1.98  | 6.16E-<br>06 | 0.00 | 0.03 | 0.012776 | NA | 1  | 6  | 6  |
| ENSG0000014145<br>2.5  | C18orf8        | -<br>4.44 | -0.06 | 9.00E-<br>06 | 0.06 | 0.07 | 0.000443 | NA | 26 | 30 | 30 |
| ENSG0000012538<br>8.15 | GRK4           | 4.41      | 0.04  | 1.03E-<br>05 | 0.15 | 0.28 | 9.08E-15 | NA | 25 | 28 | 28 |
| ENSG0000013877<br>8.7  | CENPE          | -<br>4.40 | -0.09 | 1.08E-<br>05 | 0.02 | 0.09 | 2.22E-05 | NA | 20 | 23 | 23 |
| ENSG0000014145<br>8.8  | NPC1           | -<br>4.40 | -0.06 | 1.10E-<br>05 | 0.06 | 0.15 | 1.31E-08 | NA | 11 | 14 | 14 |
| ENSG0000012335<br>3.5  | ORMDL2         | 4.37      | 0.07  | 1.24E-<br>05 | 0.04 | 0.04 | 0.006424 | NA | 14 | 19 | 19 |

|                        |                    |           |       |              |      |      |          |    |    |     |     |
|------------------------|--------------------|-----------|-------|--------------|------|------|----------|----|----|-----|-----|
| ENSG0000025141<br>7.1  | RP11-<br>1348G14.4 | -<br>4.32 | -0.07 | 1.60E-<br>05 | 0.04 | 0.15 | 1.22E-07 | NA | 10 | 13  | 13  |
| ENSG0000025998<br>2.1  | CDC37P1            | 4.30      | 0.04  | 1.71E-<br>05 | 0.11 | 0.20 | 1.25E-10 | NA | 23 | 31  | 31  |
| ENSG0000020435<br>1.7  | SKIV2L             | 4.29      | 0.27  | 1.82E-<br>05 | 0.00 | 0.47 | 2.78E-29 | NA | 11 | 50  | 50  |
| ENSG0000026094<br>7.1  | RP11-<br>384P7.7   | -<br>4.28 | -0.03 | 1.86E-<br>05 | 0.13 | 0.31 | 6.10E-17 | NA | 17 | 20  | 20  |
| ENSG0000024005<br>3.8  | LY6G5B             | -<br>4.27 | -0.15 | 1.96E-<br>05 | 0.01 | 0.21 | 2.84E-11 | NA | 5  | 53  | 53  |
| ENSG0000001025<br>6.6  | UQCRC1             | 4.25      | 0.14  | 2.10E-<br>05 | 0.01 | 0.03 | 0.032358 | NA | 5  | 7   | 7   |
| ENSG0000020433<br>8.4  | CYP21A1<br>P       | 4.20      | 0.10  | 2.71E-<br>05 | 0.02 | 0.26 | 5.59E-14 | NA | 8  | 74  | 74  |
| ENSG0000016082<br>8.13 | STAG3L2            | -<br>4.19 | -0.04 | 2.77E-<br>05 | 0.09 | 0.34 | 1.69E-18 | NA | 23 | 42  | 42  |
| ENSG0000016973<br>8.3  | DCXR               | 4.19      | 0.12  | 2.83E-<br>05 | 0.01 | 0.18 | 2.26E-09 | NA | 9  | 16  | 16  |
| ENSG0000019716<br>5.6  | SULT1A2            | 4.18      | 0.04  | 2.89E-<br>05 | 0.14 | 0.19 | 1.28E-09 | NA | 24 | 38  | 38  |
| ENSG0000012454<br>9.10 | BTN2A3P            | 4.15      | 0.03  | 3.33E-<br>05 | 0.22 | 0.25 | 3.59E-13 | NA | 99 | 123 | 123 |
| ENSG0000011739<br>4.15 | SLC2A1             | 4.14      | 0.15  | 3.41E-<br>05 | 0.01 | 0.04 | 0.009736 | NA | 4  | 5   | 5   |
| ENSG0000019727<br>9.3  | ZNF165             | 4.14      | 0.11  | 3.41E-<br>05 | 0.02 | 0.05 | 0.002956 | NA | 7  | 10  | 10  |
| ENSG0000017895<br>2.4  | TUFM               | 4.13      | 0.05  | 3.60E-<br>05 | 0.07 | 0.21 | 5.40E-11 | NA | 24 | 30  | 30  |
| ENSG0000026350<br>3.1  | RP11-<br>707O23.5  | -<br>4.06 | -0.24 | 4.81E-<br>05 | 0.00 | 0.43 | 7.25E-26 | NA | 5  | 51  | 51  |
| ENSG0000013644<br>8.7  | NMT1               | 4.06      | 0.06  | 4.81E-<br>05 | 0.06 | 0.20 | 2.04E-10 | NA | 8  | 9   | 9   |
| ENSG0000014929<br>2.12 | TTC12              | 4.06      | 0.02  | 4.86E-<br>05 | 0.51 | 0.60 | 5.22E-44 | NA | 55 | 69  | 69  |

|                        |                    |           |       |              |      |      |          |    |    |    |    |
|------------------------|--------------------|-----------|-------|--------------|------|------|----------|----|----|----|----|
| ENSG0000027042<br>4.1  | RP11-<br>1348G14.6 | 4.06      | 0.06  | 4.88E-<br>05 | 0.04 | 0.08 | 0.000147 | NA | 25 | 32 | 32 |
| ENSG0000019614<br>1.8  | SPATS2L            | 4.05      | 0.07  | 5.11E-<br>05 | 0.05 | 0.10 | 1.40E-05 | NA | 12 | 13 | 13 |
| ENSG0000016603<br>7.6  | CEP57              | -<br>4.03 | -0.07 | 5.58E-<br>05 | 0.04 | 0.10 | 1.01E-05 | NA | 64 | 66 | 66 |
| ENSG0000027162<br>3.1  | RP11-<br>435I10.5  | -<br>4.02 | -0.08 | 5.85E-<br>05 | 0.02 | 0.08 | 0.000216 | NA | 8  | 10 | 10 |
| ENSG0000010566<br>4.6  | COMP               | 4.01      | 0.06  | 6.06E-<br>05 | 0.05 | 0.07 | 0.000262 | NA | 17 | 19 | 19 |
| ENSG0000018889<br>5.7  | MSL1               | -<br>3.99 | -0.09 | 6.58E-<br>05 | 0.02 | 0.07 | 0.000542 | NA | 6  | 6  | 6  |
| ENSG0000004924<br>5.8  | VAMP3              | -<br>3.98 | -0.05 | 6.96E-<br>05 | 0.09 | 0.13 | 4.03E-07 | NA | 41 | 46 | 46 |
| ENSG0000017880<br>9.7  | TRIM73             | -<br>3.97 | -0.06 | 7.04E-<br>05 | 0.05 | 0.14 | 2.78E-07 | NA | 9  | 19 | 19 |
| ENSG0000024897<br>1.2  | KRT8P46            | 3.96      | 0.06  | 7.55E-<br>05 | 0.04 | 0.14 | 3.16E-07 | NA | 18 | 28 | 28 |
| ENSG0000023006<br>9.3  | LRRC37A<br>15P     | 3.92      | 0.05  | 9.00E-<br>05 | 0.06 | 0.12 | 2.44E-06 | NA | 36 | 39 | 39 |
| ENSG0000016262<br>3.11 | TYW3               | -<br>3.91 | -0.07 | 9.15E-<br>05 | 0.03 | 0.05 | 0.003321 | NA | 43 | 49 | 49 |
| ENSG0000021939<br>2.1  | RP1-<br>265C24.5   | 3.91      | 0.05  | 9.17E-<br>05 | 0.05 | 0.13 | 6.44E-07 | NA | 46 | 62 | 62 |
| ENSG0000014315<br>6.9  | NME7               | -<br>3.91 | -0.03 | 9.21E-<br>05 | 0.26 | 0.43 | 1.82E-25 | NA | 32 | 34 | 34 |
| ENSG0000020413<br>8.8  | PHACTR4            | -<br>3.90 | -0.04 | 9.79E-<br>05 | 0.16 | 0.21 | 4.19E-11 | NA | 56 | 75 | 75 |
| ENSG0000012894<br>4.9  | KNSTRN             | -<br>3.89 | -0.02 | 1.01E-<br>04 | 0.49 | 0.66 | 3.20E-53 | NA | 20 | 23 | 23 |
| ENSG0000023344<br>8.2  | PMS2P9             | -<br>3.88 | -0.07 | 1.03E-<br>04 | 0.03 | 0.19 | 2.78E-10 | NA | 34 | 54 | 54 |
| ENSG0000010449<br>7.9  | SNX16              | 3.88      | 0.02  | 1.04E-<br>04 | 0.34 | 0.51 | 5.49E-33 | NA | 56 | 60 | 60 |

|                        |                   |           |       |              |      |      |          |    |    |    |    |
|------------------------|-------------------|-----------|-------|--------------|------|------|----------|----|----|----|----|
| ENSG0000023682<br>9.5  | Z97634.3          | -<br>3.88 | -0.07 | 1.06E-<br>04 | 0.04 | 0.05 | 0.002091 | NA | 24 | 43 | 43 |
| ENSG0000020558<br>3.9  | STAG3L1           | -<br>3.87 | -0.05 | 1.08E-<br>04 | 0.08 | 0.34 | 1.37E-19 | NA | 15 | 26 | 26 |
| ENSG0000025836<br>5.1  | RP11-<br>1105G2.3 | -<br>3.86 | -0.05 | 1.12E-<br>04 | 0.06 | 0.05 | 0.003158 | NA | 31 | 34 | 34 |
| ENSG0000014502<br>9.7  | NICN1             | -<br>3.82 | -0.08 | 1.31E-<br>04 | 0.02 | 0.13 | 4.34E-07 | NA | 15 | 20 | 20 |
| ENSG0000017254<br>3.3  | CTSW              | -<br>3.81 | -0.05 | 1.39E-<br>04 | 0.06 | 0.31 | 1.64E-16 | NA | 8  | 12 | 12 |
| ENSG0000018333<br>6.7  | BOLA2             | -<br>3.80 | -0.31 | 1.42E-<br>04 | 0.00 | 0.04 | 0.007624 | NA | 4  | 6  | 6  |
| ENSG0000024261<br>2.2  | DECR2             | 3.80      | 0.02  | 1.43E-<br>04 | 0.29 | 0.47 | 4.01E-28 | NA | 10 | 22 | 22 |
| ENSG0000012900<br>7.10 | CALML4            | 3.79      | 0.07  | 1.54E-<br>04 | 0.03 | 0.09 | 3.28E-05 | NA | 8  | 9  | 9  |
| ENSG0000008909<br>4.12 | KDM2B             | 3.78      | 0.14  | 1.54E-<br>04 | 0.01 | 0.02 | 0.040223 | NA | 18 | 27 | 27 |
| ENSG0000010933<br>2.15 | UBE2D3            | 3.78      | 0.10  | 1.58E-<br>04 | 0.01 | 0.02 | 0.041363 | NA | 4  | 7  | 7  |
| ENSG0000016395<br>9.5  | SLC51A            | -<br>3.77 | -0.06 | 1.63E-<br>04 | 0.05 | 0.18 | 2.71E-09 | NA | 27 | 39 | 39 |
| ENSG0000020476<br>4.8  | RANBP17           | 3.76      | 0.19  | 1.69E-<br>04 | 0.01 | 0.03 | 0.030754 | NA | 4  | 5  | 5  |
| ENSG0000003380<br>0.9  | PIAS1             | 3.74      | 0.04  | 1.81E-<br>04 | 0.09 | 0.13 | 1.11E-06 | NA | 28 | 30 | 30 |
| ENSG0000011253<br>0.7  | PACRG             | -<br>3.72 | -0.03 | 1.96E-<br>04 | 0.19 | 0.30 | 4.12E-16 | NA | 28 | 28 | 28 |
| ENSG0000026181<br>9.1  | RP11-<br>680G24.4 | -<br>3.72 | -0.09 | 1.98E-<br>04 | 0.03 | 0.07 | 0.000314 | NA | 18 | 21 | 21 |
| ENSG0000016261<br>3.12 | FUBP1             | -<br>3.72 | -0.04 | 2.01E-<br>04 | 0.08 | 0.03 | 0.013216 | NA | 21 | 22 | 22 |
| ENSG0000011615<br>7.5  | GPX7              | -<br>3.70 | -0.03 | 2.16E-<br>04 | 0.22 | 0.34 | 2.57E-18 | NA | 17 | 18 | 18 |

|                        |                  |           |       |              |      |      |          |    |     |     |     |
|------------------------|------------------|-----------|-------|--------------|------|------|----------|----|-----|-----|-----|
| ENSG0000018279<br>6.8  | TMEM19<br>8B     | 3.70      | 0.05  | 2.18E-<br>04 | 0.06 | 0.07 | 0.000209 | NA | 24  | 29  | 29  |
| ENSG0000019650<br>2.7  | SULT1A1          | -<br>3.69 | -0.05 | 2.24E-<br>04 | 0.07 | 0.10 | 7.22E-06 | NA | 20  | 26  | 26  |
| ENSG0000000754<br>1.10 | PIGQ             | 3.69      | 0.12  | 2.29E-<br>04 | 0.01 | 0.02 | 0.035486 | NA | 9   | 14  | 14  |
| ENSG0000016999<br>4.14 | MYO7B            | 3.66      | 0.10  | 2.52E-<br>04 | 0.02 | 0.07 | 0.000248 | NA | 3   | 3   | 3   |
| ENSG0000016794<br>5.1  | PRR25            | 3.65      | 0.53  | 2.59E-<br>04 | 0.00 | 0.07 | 0.000224 | NA | 6   | 17  | 17  |
| ENSG0000017787<br>9.10 | AP3S1            | -<br>3.65 | -0.20 | 2.65E-<br>04 | 0.00 | 0.04 | 0.008016 | NA | 7   | 9   | 9   |
| ENSG0000019756<br>2.5  | RAB40C           | -<br>3.64 | -0.03 | 2.68E-<br>04 | 0.13 | 0.30 | 1.32E-17 | NA | 20  | 32  | 32  |
| ENSG0000024341<br>4.4  | TICAM2           | 3.64      | 0.15  | 2.78E-<br>04 | 0.01 | 0.05 | 0.002264 | NA | 4   | 4   | 4   |
| ENSG0000019890<br>9.3  | MAP3K3           | -<br>3.63 | -0.11 | 2.87E-<br>04 | 0.01 | 0.07 | 0.000436 | NA | 19  | 23  | 23  |
| ENSG0000016430<br>8.12 | ERAP2            | 3.62      | 0.02  | 3.00E-<br>04 | 0.55 | 0.68 | 7.62E-57 | NA | 27  | 30  | 30  |
| ENSG0000014908<br>4.7  | HSD17B1<br>2     | -<br>3.61 | -0.02 | 3.05E-<br>04 | 0.44 | 0.58 | 1.91E-39 | NA | 101 | 114 | 114 |
| ENSG0000027213<br>0.1  | RP11-<br>360I2.1 | -<br>3.60 | -0.25 | 3.24E-<br>04 | 0.00 | 0.25 | 3.70E-13 | NA | 7   | 12  | 12  |
| ENSG0000010790<br>2.9  | LHPP             | 3.57      | 0.03  | 3.56E-<br>04 | 0.20 | 0.09 | 2.51E-05 | NA | 80  | 104 | 104 |
| ENSG0000017009<br>2.10 | AC018720<br>.10  | 3.56      | 0.06  | 3.64E-<br>04 | 0.04 | 0.18 | 1.99E-09 | NA | 5   | 6   | 6   |

**ST6(b). MTAG GERD metaXcan analysis using eQTL information from Esophageal Mucosa tissue**

| gene                   | Gene name | z      | Effect size | Pval     | var_g | pred_perf_r2 | pred_perf_pval | pred_perf_qval | n_snps_used | n_snps_in_cov | n_snps_in_model |
|------------------------|-----------|--------|-------------|----------|-------|--------------|----------------|----------------|-------------|---------------|-----------------|
| ENSG0000000453<br>4.10 | RBM6      | -10.02 | -0.06       | 1.21E-23 | 0.29  | 0.51         | 1.05E-54       | NA             | 21          | 34            | 34              |
| ENSG0000018561<br>4.4  | FAM212A   | 9.71   | 0.39        | 2.71E-22 | 0.01  | 0.35         | 4.37E-31       | NA             | 7           | 32            | 32              |
| ENSG0000016407<br>8.8  | MST1R     | 9.65   | 0.21        | 5.01E-22 | 0.02  | 0.03         | 0.005033       | NA             | 15          | 24            | 24              |
| ENSG0000018217<br>9.6  | UBA7      | -9.02  | -0.08       | 1.86E-19 | 0.14  | 0.28         | 8.71E-25       | NA             | 10          | 20            | 20              |
| ENSG0000012454<br>9.10 | BTN2A3P   | 8.28   | 0.11        | 1.26E-16 | 0.07  | 0.12         | 1.22E-09       | NA             | 36          | 46            | 46              |
| ENSG0000000375<br>6.12 | RBM5      | -7.45  | -0.45       | 9.57E-14 | 0.00  | 0.02         | 0.006475       | NA             | 13          | 23            | 23              |
| ENSG0000011281<br>2.11 | PRSS16    | -7.13  | -0.32       | 1.04E-12 | 0.01  | 0.02         | 0.019411       | NA             | 9           | 10            | 10              |
| ENSG0000014502<br>9.7  | NICN1     | -6.76  | -0.13       | 1.42E-11 | 0.03  | 0.05         | 5.19E-05       | NA             | 23          | 32            | 32              |
| ENSG0000020478<br>9.3  | ZNF204P   | -6.68  | -0.23       | 2.44E-11 | 0.01  | 0.02         | 0.0071         | NA             | 10          | 13            | 13              |
| ENSG0000016406<br>8.11 | RNF123    | 6.65   | 0.23        | 2.93E-11 | 0.01  | 0.02         | 0.01176        | NA             | 27          | 53            | 53              |
| ENSG0000018864<br>1.8  | DPYD      | 6.34   | 0.12        | 2.32E-10 | 0.03  | 0.06         | 1.21E-05       | NA             | 21          | 23            | 23              |
| ENSG0000016406<br>2.8  | APEH      | -6.26  | -0.09       | 3.86E-10 | 0.06  | 0.12         | 4.85E-10       | NA             | 23          | 33            | 33              |
| ENSG0000011132<br>8.2  | CDK2AP1   | 6.08   | 0.05        | 1.18E-09 | 0.22  | 0.46         | 1.83E-46       | NA             | 32          | 43            | 43              |
| ENSG0000023474<br>5.5  | HLA-B     | 6.02   | 1.02        | 1.74E-09 | 0.00  | 0.19         | 7.08E-16       | NA             | 4           | 59            | 59              |

|                        |                   |       |       |              |      |      |          |    |    |    |    |
|------------------------|-------------------|-------|-------|--------------|------|------|----------|----|----|----|----|
| ENSG0000022631<br>4.3  | ZNF192P<br>1      | 5.95  | 0.24  | 2.63E-<br>09 | 0.01 | 0.05 | 0.000105 | NA | 23 | 52 | 52 |
| ENSG0000012341<br>1.10 | IKZF4             | -5.95 | -0.13 | 2.65E-<br>09 | 0.03 | 0.08 | 5.94E-07 | NA | 10 | 17 | 17 |
| ENSG0000018395<br>5.8  | SETD8             | -5.86 | -0.20 | 4.66E-<br>09 | 0.01 | 0.03 | 0.004232 | NA | 6  | 7  | 7  |
| ENSG0000019772<br>8.5  | RPS26             | -5.85 | -0.04 | 4.89E-<br>09 | 0.31 | 0.71 | 2.07E-98 | NA | 49 | 82 | 82 |
| ENSG0000015096<br>7.13 | ABCB9             | -5.82 | -0.15 | 5.81E-<br>09 | 0.02 | 0.02 | 0.009521 | NA | 13 | 20 | 20 |
| ENSG0000014502<br>0.10 | AMT               | -5.71 | -0.04 | 1.10E-<br>08 | 0.22 | 0.45 | 1.15E-44 | NA | 30 | 36 | 36 |
| ENSG0000006506<br>0.12 | UHRF1B<br>P1      | 5.51  | 0.05  | 3.58E-<br>08 | 0.17 | 0.30 | 1.08E-25 | NA | 31 | 34 | 34 |
| ENSG0000013092<br>1.3  | C12orf65          | 5.44  | 0.09  | 5.27E-<br>08 | 0.04 | 0.11 | 6.73E-09 | NA | 14 | 15 | 15 |
| ENSG0000012456<br>2.5  | SNRPC             | -5.38 | -0.07 | 7.38E-<br>08 | 0.07 | 0.16 | 1.92E-13 | NA | 39 | 47 | 47 |
| ENSG0000013953<br>1.8  | SUOX              | 5.35  | 0.37  | 8.68E-<br>08 | 0.00 | 0.04 | 0.001025 | NA | 3  | 6  | 6  |
| ENSG0000019850<br>2.5  | HLA-<br>DRB5      | -5.24 | -0.44 | 1.61E-<br>07 | 0.00 | 0.60 | 6.96E-71 | NA | 10 | 34 | 34 |
| ENSG0000013689<br>1.9  | TEX10             | 5.23  | 0.43  | 1.71E-<br>07 | 0.00 | 0.02 | 0.024762 | NA | 5  | 6  | 6  |
| ENSG0000016343<br>1.11 | LMOD1             | -5.16 | -0.07 | 2.41E-<br>07 | 0.07 | 0.09 | 4.27E-08 | NA | 22 | 28 | 28 |
| ENSG0000017353<br>1.11 | MST1              | -5.11 | -0.07 | 3.14E-<br>07 | 0.06 | 0.13 | 6.35E-11 | NA | 16 | 23 | 23 |
| ENSG0000017693<br>3.4  | TOB2P1            | -5.05 | -0.16 | 4.43E-<br>07 | 0.01 | 0.04 | 0.000602 | NA | 4  | 4  | 4  |
| ENSG0000019727<br>9.3  | ZNF165            | -5.03 | -0.10 | 4.90E-<br>07 | 0.02 | 0.07 | 2.13E-06 | NA | 11 | 17 | 17 |
| ENSG0000026181<br>9.1  | RP11-<br>680G24.4 | -4.95 | -0.07 | 7.29E-<br>07 | 0.06 | 0.07 | 1.31E-06 | NA | 16 | 21 | 21 |

|                        |                  |       |       |              |      |      |          |    |    |    |    |
|------------------------|------------------|-------|-------|--------------|------|------|----------|----|----|----|----|
| ENSG0000026178<br>6.1  | RP4-<br>555D20.2 | -4.93 | -0.08 | 8.39E-<br>07 | 0.05 | 0.11 | 5.88E-09 | NA | 10 | 11 | 11 |
| ENSG0000013594<br>5.5  | REV1             | 4.91  | 0.07  | 8.95E-<br>07 | 0.06 | 0.11 | 4.61E-09 | NA | 34 | 34 | 34 |
| ENSG0000007513<br>1.5  | TIPIN            | 4.90  | 0.06  | 9.80E-<br>07 | 0.09 | 0.12 | 4.90E-10 | NA | 55 | 64 | 64 |
| ENSG0000012538<br>8.15 | GRK4             | 4.89  | 0.03  | 9.84E-<br>07 | 0.27 | 0.36 | 8.95E-34 | NA | 21 | 25 | 25 |
| ENSG0000016082<br>8.13 | STAG3L2          | -4.89 | -0.04 | 1.00E-<br>06 | 0.19 | 0.44 | 9.67E-44 | NA | 24 | 45 | 45 |
| ENSG0000018219<br>6.9  | ARL6IP4          | 4.88  | 0.17  | 1.05E-<br>06 | 0.01 | 0.04 | 0.000264 | NA | 6  | 9  | 9  |
| ENSG0000011234<br>3.8  | TRIM38           | 4.84  | 0.05  | 1.30E-<br>06 | 0.09 | 0.17 | 8.58E-15 | NA | 39 | 46 | 46 |
| ENSG0000024005<br>3.8  | LY6G5B           | -4.79 | -0.19 | 1.66E-<br>06 | 0.01 | 0.24 | 1.13E-20 | NA | 4  | 63 | 63 |
| ENSG0000013322<br>6.12 | SRRM1            | 4.78  | 0.38  | 1.75E-<br>06 | 0.00 | 0.03 | 0.001721 | NA | 2  | 3  | 3  |
| ENSG0000016325<br>7.6  | DCAF16           | -4.74 | -0.08 | 2.17E-<br>06 | 0.04 | 0.09 | 7.80E-08 | NA | 8  | 8  | 8  |
| ENSG0000019706<br>2.7  | RP5-<br>874C20.3 | 4.73  | 0.16  | 2.30E-<br>06 | 0.01 | 0.13 | 7.28E-11 | NA | 12 | 42 | 42 |
| ENSG0000016863<br>1.7  | DPCR1            | -4.69 | -0.47 | 2.75E-<br>06 | 0.00 | 0.04 | 0.000651 | NA | 4  | 28 | 28 |
| ENSG0000017461<br>1.7  | KY               | -4.67 | -0.09 | 2.98E-<br>06 | 0.03 | 0.07 | 2.35E-06 | NA | 10 | 13 | 13 |
| ENSG0000025998<br>2.1  | CDC37P1          | 4.64  | 0.07  | 3.49E-<br>06 | 0.05 | 0.16 | 2.83E-13 | NA | 9  | 17 | 17 |
| ENSG0000014405<br>7.11 | ST6GAL2          | -4.62 | -0.06 | 3.92E-<br>06 | 0.07 | 0.10 | 1.48E-08 | NA | 21 | 23 | 23 |
| ENSG0000015755<br>4.14 | ERG              | -4.60 | -0.06 | 4.19E-<br>06 | 0.06 | 0.11 | 1.46E-09 | NA | 17 | 24 | 24 |
| ENSG0000018647<br>0.9  | BTN3A2           | 4.58  | 0.02  | 4.59E-<br>06 | 0.39 | 0.60 | 1.25E-71 | NA | 53 | 61 | 61 |

|                        |                |       |       |          |      |      |          |    |    |    |    |
|------------------------|----------------|-------|-------|----------|------|------|----------|----|----|----|----|
| ENSG0000014145<br>2.5  | C18orf8        | -4.56 | -0.26 | 5.10E-06 | 0.00 | 0.02 | 0.033187 | NA | 2  | 2  | 2  |
| ENSG0000018444<br>5.7  | KNTC1          | -4.56 | -0.13 | 5.21E-06 | 0.02 | 0.05 | 4.41E-05 | NA | 10 | 21 | 21 |
| ENSG0000014145<br>8.8  | NPC1           | -4.54 | -0.05 | 5.73E-06 | 0.11 | 0.18 | 8.31E-15 | NA | 19 | 33 | 33 |
| ENSG0000016058<br>4.11 | SIK3           | 4.53  | 0.16  | 5.98E-06 | 0.01 | 0.04 | 0.000949 | NA | 8  | 9  | 9  |
| ENSG0000024897<br>1.2  | KRT8P46        | 4.52  | 0.05  | 6.12E-06 | 0.08 | 0.18 | 9.20E-15 | NA | 15 | 18 | 18 |
| ENSG0000019716<br>5.6  | SULT1A2        | 4.51  | 0.08  | 6.56E-06 | 0.03 | 0.22 | 4.44E-18 | NA | 20 | 27 | 27 |
| ENSG0000015438<br>0.12 | ENAH           | -4.49 | -0.05 | 7.28E-06 | 0.09 | 0.07 | 1.25E-06 | NA | 26 | 29 | 29 |
| ENSG0000011640<br>6.14 | EDEM3          | -4.44 | -0.06 | 9.17E-06 | 0.06 | 0.10 | 1.12E-08 | NA | 15 | 17 | 17 |
| ENSG0000020433<br>8.4  | CYP21A1<br>P   | 4.43  | 0.08  | 9.64E-06 | 0.03 | 0.25 | 1.02E-21 | NA | 8  | 69 | 69 |
| ENSG0000017818<br>8.10 | SH2B1          | -4.42 | -0.10 | 9.81E-06 | 0.02 | 0.02 | 0.030996 | NA | 21 | 25 | 25 |
| ENSG0000016603<br>7.6  | CEP57          | -4.37 | -0.04 | 1.24E-05 | 0.19 | 0.30 | 8.84E-26 | NA | 53 | 53 | 53 |
| ENSG0000018889<br>5.7  | MSL1           | -4.37 | -0.06 | 1.24E-05 | 0.07 | 0.11 | 3.47E-09 | NA | 11 | 15 | 15 |
| ENSG0000013741<br>1.12 | VAR52          | -4.32 | -0.65 | 1.58E-05 | 0.00 | 0.26 | 1.35E-23 | NA | 1  | 49 | 49 |
| ENSG0000017895<br>2.4  | TUFM           | 4.29  | 0.05  | 1.79E-05 | 0.10 | 0.17 | 3.78E-14 | NA | 13 | 16 | 16 |
| ENSG0000012993<br>3.16 | MAU2           | -4.27 | -0.08 | 1.95E-05 | 0.03 | 0.03 | 0.001413 | NA | 28 | 34 | 34 |
| ENSG0000025688<br>5.1  | AP00187<br>7.1 | -4.26 | -0.07 | 2.09E-05 | 0.05 | 0.15 | 1.04E-12 | NA | 58 | 59 | 59 |
| ENSG0000010489<br>9.4  | AMH            | 4.26  | 0.04  | 2.09E-05 | 0.14 | 0.27 | 1.07E-23 | NA | 24 | 51 | 51 |

|                        |               |       |       |          |      |      |          |    |    |    |    |
|------------------------|---------------|-------|-------|----------|------|------|----------|----|----|----|----|
| ENSG0000023008<br>8.1  | KRT16P5       | -4.23 | -0.11 | 2.30E-05 | 0.02 | 0.10 | 1.38E-08 | NA | 22 | 39 | 39 |
| ENSG0000010933<br>2.15 | UBE2D3        | 4.23  | 0.08  | 2.31E-05 | 0.03 | 0.10 | 1.42E-08 | NA | 27 | 32 | 32 |
| ENSG0000016920<br>3.12 | RP11-231C14.4 | 4.22  | 0.08  | 2.43E-05 | 0.03 | 0.15 | 6.08E-12 | NA | 12 | 23 | 23 |
| ENSG0000017020<br>9.4  | ANKK1         | 4.22  | 0.11  | 2.50E-05 | 0.02 | 0.05 | 0.000108 | NA | 13 | 13 | 13 |
| ENSG0000019650<br>2.7  | SULT1A1       | -4.21 | -0.16 | 2.50E-05 | 0.01 | 0.12 | 1.28E-09 | NA | 8  | 22 | 22 |
| ENSG0000017149<br>7.4  | PPID          | 4.20  | 0.06  | 2.64E-05 | 0.06 | 0.14 | 6.57E-12 | NA | 5  | 5  | 5  |
| ENSG0000013527<br>2.5  | MDFIC         | -4.18 | -0.06 | 2.91E-05 | 0.07 | 0.06 | 3.02E-05 | NA | 35 | 41 | 41 |
| ENSG0000016765<br>3.4  | PSCA          | -4.16 | -0.03 | 3.15E-05 | 0.20 | 0.32 | 8.03E-28 | NA | 17 | 18 | 18 |
| ENSG0000013019<br>3.7  | THEM6         | -4.15 | -0.06 | 3.29E-05 | 0.05 | 0.12 | 3.70E-10 | NA | 21 | 23 | 23 |
| ENSG0000016088<br>6.9  | LY6K          | -4.13 | -0.03 | 3.70E-05 | 0.24 | 0.33 | 1.80E-29 | NA | 32 | 33 | 33 |
| ENSG0000001111<br>4.10 | BTBD7         | 4.12  | 0.11  | 3.71E-05 | 0.02 | 0.05 | 8.38E-05 | NA | 17 | 20 | 20 |
| ENSG0000019785<br>2.8  | FAM212B       | -4.11 | -0.11 | 3.92E-05 | 0.02 | 0.04 | 0.000242 | NA | 15 | 21 | 21 |
| ENSG0000019889<br>2.6  | SHISA4        | -4.10 | -0.12 | 4.13E-05 | 0.01 | 0.03 | 0.001294 | NA | 9  | 10 | 10 |
| ENSG0000011316<br>3.11 | COL4A3BP      | 4.09  | 0.07  | 4.30E-05 | 0.05 | 0.05 | 6.65E-05 | NA | 16 | 16 | 16 |
| ENSG0000015660<br>3.10 | MED19         | -4.07 | -0.05 | 4.80E-05 | 0.09 | 0.13 | 3.62E-11 | NA | 26 | 27 | 27 |
| ENSG0000017263<br>8.8  | EFEMP2        | 4.03  | 0.06  | 5.60E-05 | 0.06 | 0.10 | 2.76E-08 | NA | 23 | 35 | 35 |
| ENSG0000010024<br>2.11 | SUN2          | -4.02 | -0.05 | 5.84E-05 | 0.07 | 0.17 | 1.06E-13 | NA | 11 | 14 | 14 |

|                        |              |       |       |          |      |      |          |    |    |    |    |
|------------------------|--------------|-------|-------|----------|------|------|----------|----|----|----|----|
| ENSG0000011750<br>0.8  | TMED5        | -4.01 | -0.13 | 6.18E-05 | 0.01 | 0.04 | 0.000349 | NA | 6  | 7  | 7  |
| ENSG0000010589<br>4.7  | PTN          | -4.00 | -0.04 | 6.29E-05 | 0.14 | 0.29 | 2.00E-25 | NA | 13 | 14 | 14 |
| ENSG0000026094<br>7.1  | RP11-384P7.7 | -3.99 | -0.03 | 6.55E-05 | 0.17 | 0.28 | 3.11E-24 | NA | 39 | 42 | 42 |
| ENSG0000025974<br>7.1  | RP11-275I4.2 | -3.98 | -0.03 | 6.80E-05 | 0.19 | 0.31 | 8.62E-27 | NA | 42 | 45 | 45 |
| ENSG0000020476<br>4.8  | RANBP17      | 3.97  | 0.16  | 7.20E-05 | 0.01 | 0.04 | 0.000357 | NA | 44 | 47 | 47 |
| ENSG0000019665<br>3.7  | ZNF502       | -3.96 | -0.03 | 7.53E-05 | 0.20 | 0.25 | 3.64E-21 | NA | 29 | 34 | 34 |
| ENSG0000010449<br>7.9  | SNX16        | 3.95  | 0.03  | 7.73E-05 | 0.19 | 0.30 | 5.56E-26 | NA | 33 | 37 | 37 |
| ENSG0000024347<br>7.1  | NAT6         | 3.94  | 0.07  | 8.01E-05 | 0.04 | 0.06 | 1.99E-05 | NA | 11 | 20 | 20 |
| ENSG0000014315<br>6.9  | NME7         | -3.94 | -0.04 | 8.11E-05 | 0.13 | 0.27 | 2.07E-23 | NA | 31 | 34 | 34 |
| ENSG0000010488<br>6.5  | PLEKHJ1      | -3.93 | -6.02 | 8.41E-05 | 0.00 | 0.02 | 0.015701 | NA | 1  | 3  | 3  |
| ENSG0000011615<br>7.5  | GPX7         | -3.93 | -0.03 | 8.49E-05 | 0.18 | 0.27 | 2.94E-23 | NA | 49 | 54 | 54 |
| ENSG0000024261<br>2.2  | DECR2        | 3.92  | 0.02  | 8.86E-05 | 0.37 | 0.51 | 1.39E-53 | NA | 12 | 20 | 20 |
| ENSG0000015921<br>0.5  | SNF8         | 3.92  | 0.09  | 9.03E-05 | 0.02 | 0.03 | 0.001638 | NA | 12 | 14 | 14 |
| ENSG0000012894<br>4.9  | KNSTRN       | -3.90 | -0.02 | 9.65E-05 | 0.25 | 0.40 | 9.72E-39 | NA | 11 | 14 | 14 |
| ENSG0000017361<br>1.13 | SCAI         | 3.90  | 0.10  | 9.77E-05 | 0.02 | 0.05 | 4.94E-05 | NA | 9  | 9  | 9  |

**ST6(c). MTAG GERD metaXcan analysis using eQTL information from Esophageal Muscularis tissue**

| gene                   | Gene name    | Z     | Effect size | Pval     | var_g | pred_perf_r2 | pred_perf_pval | pred_perf_qval | n_snps_used | n_snps_in_cov | n_snps_in_model |
|------------------------|--------------|-------|-------------|----------|-------|--------------|----------------|----------------|-------------|---------------|-----------------|
| ENSG0000000453<br>4.10 | RBM6         | -9.67 | -0.07       | 3.98E-22 | 0.21  | 0.48         | 5.69E-46       | NA             | 19          | 24            | 24              |
| ENSG0000016406<br>8.11 | RNF123       | 9.62  | 0.32        | 6.62E-22 | 0.01  | 0.18         | 4.25E-14       | NA             | 23          | 54            | 54              |
| ENSG0000017354<br>0.8  | GMPPB        | 8.67  | 0.22        | 4.42E-18 | 0.02  | 0.16         | 1.83E-12       | NA             | 9           | 16            | 16              |
| ENSG0000020381<br>3.4  | HIST1H3H     | 7.97  | 0.24        | 1.58E-15 | 0.01  | 0.02         | 0.036367       | NA             | 39          | 58            | 58              |
| ENSG0000022800<br>8.1  | CTD-2330K9.3 | 7.65  | 0.20        | 1.96E-14 | 0.02  | 0.05         | 0.000147       | NA             | 8           | 13            | 13              |
| ENSG0000019772<br>8.5  | RPS26        | -6.70 | -0.05       | 2.07E-11 | 0.19  | 0.71         | 3.61E-94       | NA             | 6           | 13            | 13              |
| ENSG0000014502<br>9.7  | NICN1        | -6.55 | -0.08       | 5.82E-11 | 0.09  | 0.17         | 4.66E-14       | NA             | 35          | 51            | 51              |
| ENSG0000013953<br>1.8  | SUOX         | 6.46  | 0.09        | 1.03E-10 | 0.06  | 0.22         | 3.68E-17       | NA             | 6           | 9             | 9               |
| ENSG0000005182<br>5.10 | MPHOSPH9     | -6.36 | -0.07       | 2.07E-10 | 0.09  | 0.15         | 1.63E-11       | NA             | 14          | 23            | 23              |
| ENSG0000017805<br>7.10 | NDUFAB3      | -6.35 | -0.11       | 2.22E-10 | 0.03  | 0.03         | 0.002063       | NA             | 7           | 15            | 15              |
| ENSG0000012454<br>9.10 | BTN2A3P      | 6.28  | 0.06        | 3.34E-10 | 0.13  | 0.23         | 5.00E-18       | NA             | 35          | 41            | 41              |
| ENSG0000012456<br>2.5  | SNRPC        | -6.17 | -0.07       | 6.69E-10 | 0.08  | 0.15         | 2.20E-11       | NA             | 14          | 14            | 14              |
| ENSG0000011132<br>5.12 | OGFOD2       | -5.97 | -0.26       | 2.40E-09 | 0.01  | 0.03         | 0.001828       | NA             | 13          | 16            | 16              |
| ENSG0000013092<br>1.3  | C12orf65     | 5.88  | 0.14        | 4.11E-09 | 0.02  | 0.07         | 8.15E-06       | NA             | 8           | 11            | 11              |
| ENSG0000022720<br>7.2  | RPL31P12     | -5.85 | -0.06       | 4.83E-09 | 0.10  | 0.20         | 1.74E-15       | NA             | 21          | 26            | 26              |

|                        |               |       |       |          |      |      |          |    |    |     |     |
|------------------------|---------------|-------|-------|----------|------|------|----------|----|----|-----|-----|
| ENSG0000006874<br>5.10 | IP6K2         | 5.81  | 0.20  | 6.20E-09 | 0.01 | 0.09 | 1.08E-07 | NA | 12 | 15  | 15  |
| ENSG0000016325<br>7.6  | DCAF16        | -5.59 | -0.08 | 2.32E-08 | 0.05 | 0.10 | 7.78E-09 | NA | 15 | 16  | 16  |
| ENSG0000011132<br>8.2  | CDK2AP1       | 5.52  | 0.10  | 3.39E-08 | 0.04 | 0.10 | 2.57E-08 | NA | 18 | 25  | 25  |
| ENSG0000016082<br>8.13 | STAG3L2       | -5.50 | -0.07 | 3.72E-08 | 0.08 | 0.39 | 7.44E-34 | NA | 13 | 26  | 26  |
| ENSG0000019821<br>8.6  | QRICH1        | 5.50  | 0.13  | 3.73E-08 | 0.02 | 0.11 | 1.81E-08 | NA | 29 | 38  | 38  |
| ENSG0000023474<br>5.5  | HLA-B         | 5.50  | 0.49  | 3.84E-08 | 0.00 | 0.07 | 6.76E-06 | NA | 5  | 117 | 117 |
| ENSG0000014502<br>0.10 | AMT           | -5.38 | -0.04 | 7.31E-08 | 0.19 | 0.48 | 8.15E-46 | NA | 26 | 35  | 35  |
| ENSG0000021939<br>2.1  | RP1-265C24.5  | 5.27  | 0.05  | 1.34E-07 | 0.13 | 0.23 | 7.37E-19 | NA | 19 | 23  | 23  |
| ENSG0000013693<br>3.12 | RABEPK        | 5.25  | 0.07  | 1.52E-07 | 0.07 | 0.09 | 1.88E-07 | NA | 27 | 31  | 31  |
| ENSG0000014145<br>8.8  | NPC1          | -5.25 | -0.06 | 1.56E-07 | 0.08 | 0.14 | 6.47E-11 | NA | 19 | 22  | 22  |
| ENSG0000006506<br>0.12 | UHRF1BP1      | 5.17  | 0.03  | 2.40E-07 | 0.36 | 0.55 | 1.72E-56 | NA | 68 | 81  | 81  |
| ENSG0000011281<br>2.11 | PRSS16        | -5.14 | -0.05 | 2.74E-07 | 0.14 | 0.09 | 1.26E-07 | NA | 58 | 76  | 76  |
| ENSG0000024829<br>0.1  | TNXA          | 5.13  | 0.09  | 2.90E-07 | 0.04 | 0.22 | 5.23E-18 | NA | 10 | 30  | 30  |
| ENSG0000025453<br>1.1  | AP001816.1    | -5.09 | -0.08 | 3.63E-07 | 0.04 | 0.13 | 2.08E-10 | NA | 25 | 30  | 30  |
| ENSG0000011640<br>6.14 | EDEM3         | -5.04 | -0.06 | 4.69E-07 | 0.09 | 0.26 | 8.32E-21 | NA | 19 | 25  | 25  |
| ENSG0000022737<br>3.1  | RP11-160H22.5 | -5.00 | -0.16 | 5.80E-07 | 0.01 | 0.06 | 5.29E-05 | NA | 16 | 23  | 23  |
| ENSG0000014502<br>2.4  | TCTA          | -4.99 | -0.11 | 5.92E-07 | 0.03 | 0.05 | 0.00013  | NA | 37 | 48  | 48  |

|                        |                |       |       |          |      |      |          |    |    |    |    |
|------------------------|----------------|-------|-------|----------|------|------|----------|----|----|----|----|
| ENSG0000015919<br>9.9  | ATP5G1         | 4.99  | 0.06  | 6.16E-07 | 0.08 | 0.11 | 5.27E-09 | NA | 40 | 42 | 42 |
| ENSG0000018767<br>6.7  | B3GALTL        | -4.94 | -0.07 | 7.69E-07 | 0.05 | 0.13 | 6.41E-10 | NA | 18 | 21 | 21 |
| ENSG0000022484<br>3.2  | LINC00240      | -4.91 | -0.07 | 8.96E-07 | 0.04 | 0.11 | 6.26E-09 | NA | 17 | 24 | 24 |
| ENSG0000018647<br>0.9  | BTN3A2         | 4.91  | 0.02  | 8.99E-07 | 0.36 | 0.58 | 2.19E-61 | NA | 32 | 36 | 36 |
| ENSG0000022585<br>1.1  | HLA-S          | 4.90  | 0.47  | 9.47E-07 | 0.00 | 0.29 | 6.46E-24 | NA | 9  | 87 | 87 |
| ENSG0000011894<br>6.7  | PCDH17         | 4.83  | 0.13  | 1.36E-06 | 0.02 | 0.02 | 0.029622 | NA | 42 | 49 | 49 |
| ENSG0000012538<br>8.15 | GRK4           | 4.83  | 0.04  | 1.38E-06 | 0.16 | 0.27 | 5.52E-22 | NA | 20 | 21 | 21 |
| ENSG0000025141<br>7.1  | RP11-1348G14.4 | -4.82 | -0.05 | 1.41E-06 | 0.11 | 0.13 | 2.83E-10 | NA | 25 | 39 | 39 |
| ENSG0000017586<br>6.11 | BAIAP2         | 4.78  | 0.22  | 1.79E-06 | 0.01 | 0.01 | 0.049764 | NA | 10 | 14 | 14 |
| ENSG0000020446<br>3.8  | BAG6           | 4.72  | 0.24  | 2.31E-06 | 0.00 | 0.23 | 2.72E-18 | NA | 4  | 27 | 27 |
| ENSG0000019716<br>5.6  | SULT1A2        | 4.70  | 0.10  | 2.63E-06 | 0.02 | 0.26 | 6.14E-21 | NA | 24 | 33 | 33 |
| ENSG0000020448<br>2.6  | LST1           | 4.67  | 0.53  | 3.08E-06 | 0.00 | 0.04 | 0.000473 | NA | 2  | 28 | 28 |
| ENSG0000012396<br>5.12 | PMS2P5         | -4.65 | -0.09 | 3.32E-06 | 0.03 | 0.32 | 1.86E-26 | NA | 4  | 8  | 8  |
| ENSG0000014145<br>2.5  | C18orf8        | -4.63 | -0.05 | 3.59E-06 | 0.08 | 0.13 | 5.94E-10 | NA | 18 | 23 | 23 |
| ENSG0000017226<br>0.9  | NEGR1          | 4.63  | 0.10  | 3.65E-06 | 0.02 | 0.04 | 0.000896 | NA | 21 | 24 | 24 |
| ENSG0000010566<br>2.11 | CRTC1          | -4.61 | -0.18 | 4.00E-06 | 0.01 | 0.04 | 0.001527 | NA | 7  | 12 | 12 |
| ENSG0000007513<br>1.5  | TIPIN          | 4.61  | 0.04  | 4.09E-06 | 0.19 | 0.31 | 2.50E-25 | NA | 43 | 47 | 47 |

|                        |                   |       |       |          |      |      |          |    |    |    |    |
|------------------------|-------------------|-------|-------|----------|------|------|----------|----|----|----|----|
| ENSG0000014309<br>3.10 | STRIP1            | 4.54  | 0.10  | 5.76E-06 | 0.02 | 0.05 | 0.000122 | NA | 9  | 12 | 12 |
| ENSG0000001111<br>4.10 | BTBD7             | 4.47  | 0.07  | 7.74E-06 | 0.04 | 0.01 | 0.042427 | NA | 79 | 93 | 93 |
| ENSG0000015206<br>1.17 | RABGAP1<br>L      | -4.43 | -0.03 | 9.44E-06 | 0.23 | 0.41 | 4.52E-37 | NA | 29 | 32 | 32 |
| ENSG0000011153<br>0.8  | CAND1             | -4.42 | -0.10 | 9.73E-06 | 0.02 | 0.07 | 3.16E-06 | NA | 13 | 13 | 13 |
| ENSG0000007848<br>7.13 | ZCWPW1            | 4.42  | 0.21  | 9.90E-06 | 0.01 | 0.03 | 0.005818 | NA | 16 | 26 | 26 |
| ENSG0000017895<br>2.4  | TUFM              | 4.39  | 0.07  | 1.15E-05 | 0.05 | 0.16 | 5.20E-13 | NA | 28 | 41 | 41 |
| ENSG0000023006<br>9.3  | LRRC37A1<br>5P    | 4.37  | 0.07  | 1.23E-05 | 0.04 | 0.16 | 1.49E-12 | NA | 7  | 9  | 9  |
| ENSG0000018411<br>0.10 | EIF3C             | 4.36  | 0.13  | 1.28E-05 | 0.01 | 0.06 | 3.51E-05 | NA | 9  | 14 | 14 |
| ENSG0000013877<br>8.7  | CENPE             | -4.36 | -0.05 | 1.29E-05 | 0.10 | 0.10 | 9.75E-08 | NA | 43 | 47 | 47 |
| ENSG0000005279<br>5.8  | FNIP2             | -4.35 | -0.08 | 1.33E-05 | 0.04 | 0.03 | 0.006003 | NA | 61 | 71 | 71 |
| ENSG0000015921<br>0.5  | SNF8              | 4.34  | 0.09  | 1.42E-05 | 0.02 | 0.06 | 2.72E-05 | NA | 11 | 12 | 12 |
| ENSG0000016920<br>3.12 | RP11-<br>231C14.4 | 4.33  | 0.14  | 1.51E-05 | 0.01 | 0.05 | 0.000163 | NA | 12 | 27 | 27 |
| ENSG0000017818<br>8.10 | SH2B1             | -4.33 | -0.26 | 1.52E-05 | 0.00 | 0.05 | 0.000132 | NA | 21 | 27 | 27 |
| ENSG0000016708<br>1.12 | PBX3              | -4.32 | -0.04 | 1.53E-05 | 0.13 | 0.21 | 3.40E-17 | NA | 27 | 32 | 32 |
| ENSG0000014929<br>5.9  | DRD2              | 4.32  | 0.07  | 1.58E-05 | 0.05 | 0.12 | 7.75E-10 | NA | 13 | 15 | 15 |
| ENSG0000017693<br>3.4  | TOB2P1            | -4.29 | -0.14 | 1.82E-05 | 0.01 | 0.02 | 0.011221 | NA | 3  | 3  | 3  |
| ENSG0000012091<br>0.10 | PPP3CC            | 4.28  | 0.08  | 1.91E-05 | 0.03 | 0.05 | 5.51E-05 | NA | 24 | 32 | 32 |

|                        |               |       |       |          |      |      |          |    |    |    |    |
|------------------------|---------------|-------|-------|----------|------|------|----------|----|----|----|----|
| ENSG0000018913<br>4.3  | NKAPL         | 4.25  | 0.17  | 2.17E-05 | 0.01 | 0.03 | 0.002042 | NA | 5  | 6  | 6  |
| ENSG0000006470<br>3.7  | DDX20         | 4.23  | 0.09  | 2.29E-05 | 0.03 | 0.09 | 3.55E-07 | NA | 6  | 7  | 7  |
| ENSG0000020425<br>6.8  | BRD2          | 4.21  | 0.45  | 2.53E-05 | 0.00 | 0.08 | 2.15E-06 | NA | 5  | 15 | 15 |
| ENSG0000017020<br>9.4  | ANKK1         | -4.21 | -0.05 | 2.60E-05 | 0.07 | 0.13 | 6.35E-10 | NA | 20 | 22 | 22 |
| ENSG0000016537<br>9.9  | LRFN5         | 4.19  | 0.06  | 2.74E-05 | 0.06 | 0.11 | 1.92E-08 | NA | 28 | 32 | 32 |
| ENSG0000025688<br>5.1  | AP001877.1    | -4.18 | -0.03 | 2.86E-05 | 0.18 | 0.28 | 4.86E-23 | NA | 59 | 61 | 61 |
| ENSG0000014624<br>3.9  | IRAK1BP1      | 4.16  | 0.04  | 3.15E-05 | 0.14 | 0.30 | 2.56E-24 | NA | 22 | 27 | 27 |
| ENSG0000019699<br>3.4  | NPIP9         | -4.16 | -0.10 | 3.20E-05 | 0.02 | 0.09 | 1.21E-07 | NA | 6  | 8  | 8  |
| ENSG0000011941<br>4.7  | PPP6C         | 4.16  | 0.10  | 3.20E-05 | 0.02 | 0.02 | 0.019087 | NA | 13 | 18 | 18 |
| ENSG0000027044<br>1.1  | RP11-694I15.7 | -4.15 | -0.20 | 3.37E-05 | 0.01 | 0.02 | 0.023651 | NA | 21 | 30 | 30 |
| ENSG0000010449<br>7.9  | SNX16         | 4.13  | 0.02  | 3.58E-05 | 0.33 | 0.51 | 9.11E-51 | NA | 52 | 57 | 57 |
| ENSG0000019665<br>3.7  | ZNF502        | -4.13 | -0.06 | 3.60E-05 | 0.06 | 0.13 | 2.63E-10 | NA | 3  | 4  | 4  |
| ENSG0000018131<br>5.6  | ZNF322        | -4.13 | -0.07 | 3.69E-05 | 0.05 | 0.08 | 1.73E-06 | NA | 34 | 45 | 45 |
| ENSG0000010489<br>9.4  | AMH           | 4.12  | 0.03  | 3.72E-05 | 0.17 | 0.49 | 4.26E-48 | NA | 4  | 7  | 7  |
| ENSG0000013693<br>5.9  | GOLGA1        | -4.12 | -0.06 | 3.72E-05 | 0.05 | 0.06 | 1.87E-05 | NA | 13 | 15 | 15 |
| ENSG0000011234<br>3.8  | TRIM38        | 4.12  | 0.07  | 3.76E-05 | 0.04 | 0.12 | 1.60E-09 | NA | 11 | 12 | 12 |
| ENSG0000016870<br>2.12 | LRP1B         | 4.11  | 0.05  | 3.94E-05 | 0.09 | 0.17 | 2.31E-13 | NA | 36 | 39 | 39 |

|                       |         |       |       |              |      |      |          |    |    |    |    |
|-----------------------|---------|-------|-------|--------------|------|------|----------|----|----|----|----|
| ENSG0000018904<br>5.9 | ANKDD1B | 4.11  | 0.06  | 3.94E<br>-05 | 0.06 | 0.04 | 0.000577 | NA | 36 | 48 | 48 |
| ENSG0000005427<br>7.8 | OPN3    | 4.10  | 0.13  | 4.08E<br>-05 | 0.01 | 0.10 | 8.88E-08 | NA | 5  | 7  | 7  |
| ENSG0000014535<br>4.5 | CISD2   | 4.08  | 0.06  | 4.53E<br>-05 | 0.06 | 0.10 | 1.06E-07 | NA | 19 | 19 | 19 |
| ENSG0000020478<br>9.3 | ZNF204P | -4.07 | -0.07 | 4.64E<br>-05 | 0.04 | 0.04 | 0.000776 | NA | 28 | 33 | 33 |

## ST7. MultiXcan top associated genes with GERD susceptibility

| gene               | gene_name    | pvalue   | n  | n_ind<br>ep | p_i_b<br>est | t_i_best                             | p_i_wor<br>st | t_i_worst                         | eigen_m<br>ax | eigen<br>_min | eigen_mi<br>n_kept | z_<br>min | z_ma<br>x | z_me<br>an | z_s<br>d | tmi |
|--------------------|--------------|----------|----|-------------|--------------|--------------------------------------|---------------|-----------------------------------|---------------|---------------|--------------------|-----------|-----------|------------|----------|-----|
| ENSG00000164068.11 | RNF123       | 7.00E-29 | 26 | 9           | 1.34E-23     | Thyroid                              | 0.893822      | Uterus                            | 13.62         | 0.01          | 0.60               | 0.13      | 10.01     | 7.79       | 2.68     | 9   |
| ENSG00000182179.6  | UBA7         | 1.43E-27 | 13 | 7           | 8.26E-23     | Whole_Blood                          | 2.81E-05      | Artery_Aorta                      | 7.52          | 0.00          | 0.28               | -9.83     | 6.97      | -7.04      | 4.54     | 7   |
| ENSG00000003756.12 | RBM5         | 2.99E-27 | 2  | 2           | 1.42E-18     | Nerve_Tibial                         | 9.57E-14      | Esophagus_Mucosa                  | 1.09          | 0.91          | 0.91               | -8.80     | -7.45     | -8.12      | 0.95     | 2   |
| ENSG00000164078.8  | MST1R        | 1.40E-25 | 20 | 10          | 3.86E-24     | Cells_Transformed_fibroblasts        | 0.066639      | Brain_Frontal_Cortex_BA9          | 10.61         | 0.01          | 0.37               | -1.95     | 10.14     | 6.72       | 3.32     | 10  |
| ENSG00000185614.4  | FAM212A      | 1.52E-25 | 9  | 4           | 1.34E-24     | Muscle_Skeletal                      | 0.161564      | Testis                            | 5.82          | 0.00          | 0.22               | -9.42     | 10.24     | 1.83       | 8.59     | 4   |
| ENSG00000185909.10 | KLHDC8B      | 3.84E-24 | 11 | 6           | 2.74E-22     | Brain_Anterior_cingulate_cortex_BA24 | 0.926759      | Esophagus_Muscularis              | 6.93          | 0.01          | 0.28               | -9.71     | 7.02      | 2.81       | 4.72     | 6   |
| ENSG00000114378.12 | HYAL1        | 2.49E-23 | 16 | 9           | 5.65E-16     | Cells_Transformed_fibroblasts        | 0.533411      | Esophagus_Muscularis              | 7.72          | 0.02          | 0.26               | -8.10     | 6.39      | -1.72      | 3.61     | 9   |
| ENSG00000176095.7  | IP6K1        | 4.49E-23 | 6  | 6           | 2.13E-23     | Thyroid                              | 0.45251       | Esophagus_Muscularis              | 2.20          | 0.23          | 0.23               | -9.95     | 9.97      | 1.54       | 6.48     | 6   |
| ENSG00000004534.10 | RBM6         | 6.80E-23 | 39 | 1           | 7.15E-25     | Adrenal_Gland                        | 5.72E-12      | Cells_EBV-transformed_lymphocytes | 36.33         | 0.00          | 36.33              | -10.30    | -6.89     | -9.49      | 0.67     | 1   |
| ENSG00000196126.6  | HLA-DRB1     | 2.88E-22 | 32 | 23          | 8.97E-07     | Brain_Hippocampus                    | 0.985056      | Testis                            | 5.23          | 0.00          | 0.18               | -4.91     | 2.14      | -2.22      | 2.12     | 23  |
| ENSG00000228008.1  | CTD-2330K9.3 | 3.18E-22 | 6  | 4           | 4.56E-23     | Breast_Mammary_Tissue                | 2.39E-07      | Stomach                           | 3.95          | 0.03          | 0.43               | 5.17      | 9.89      | 7.93       | 1.83     | 4   |
| ENSG00000234667.1  | ACTBP13      | 1.07E-21 | 2  | 2           | 1.59E-22     | Colon_Transverse                     | 9.04E-19      | Stomach                           | 1.85          | 0.15          | 0.15               | -9.77     | -8.85     | -9.31      | 0.65     | 2   |

|                   |          |          |    |    |          |                          |          |                               |       |      |      |       |      |       |      |    |
|-------------------|----------|----------|----|----|----------|--------------------------|----------|-------------------------------|-------|------|------|-------|------|-------|------|----|
| ENSG0000164076.12 | CAMKV    | 1.21E-21 | 3  | 3  | 2.20E-22 | Testis                   | 1.84E-16 | Stomach                       | 2.52  | 0.19 | 0.19 | 8.23  | 9.73 | 8.89  | 0.77 | 3  |
| ENSG0000229391.3  | HLA-DRB6 | 1.47E-21 | 36 | 28 | 9.03E-07 | Minor_Salivary_Gland     | 0.96292  | Esophagus_Muscularis          | 4.41  | 0.10 | 0.18 | -1.43 | 4.91 | 2.38  | 1.87 | 28 |
| ENSG0000233276.2  | GPX1     | 1.53E-21 | 13 | 7  | 8.03E-18 | Brain_Frontal_Cortex_BA9 | 0.780015 | Esophagus_Mucosa              | 6.12  | 0.01 | 0.30 | -7.69 | 8.60 | 2.53  | 5.21 | 7  |
| ENSG0000173531.11 | MST1     | 2.38E-21 | 25 | 11 | 3.24E-15 | Brain_Hypothalamus       | 0.981955 | Muscle_Skeletal               | 10.39 | 0.01 | 0.45 | -7.88 | 2.76 | -2.30 | 3.02 | 11 |
| ENSG0000173540.8  | GMPPB    | 7.45E-21 | 16 | 7  | 1.46E-21 | Stomach                  | 1.04E-05 | Heart_Left_Ventricle          | 9.48  | 0.00 | 0.36 | 4.41  | 9.54 | 6.98  | 1.79 | 7  |
| ENSG0000164062.8  | APEH     | 1.06E-20 | 9  | 6  | 8.92E-17 | Nerve_Tibial             | 0.60914  | Esophagus_Muscularis          | 5.70  | 0.04 | 0.28 | -8.32 | 7.56 | -4.13 | 5.11 | 6  |
| ENSG0000145029.7  | NICN1    | 6.44E-20 | 20 | 5  | 2.60E-13 | Heart_Left_Ventricle     | 0.501645 | Brain_Cerebellum              | 14.91 | 0.00 | 0.63 | -7.31 | 4.54 | -5.03 | 2.87 | 5  |
| ENSG0000001617.7  | SEMA3F   | 4.05E-19 | 12 | 7  | 1.55E-20 | Adipose_Subcutaneous     | 0.00321  | Prostate                      | 7.03  | 0.04 | 0.30 | -9.29 | 8.45 | -4.94 | 4.72 | 7  |
| ENSG0000164077.9  | MON1A    | 2.09E-17 | 3  | 3  | 1.88E-16 | Thyroid                  | 0.508416 | Nerve_Tibial                  | 1.42  | 0.70 | 0.70 | -5.01 | 8.23 | 0.85  | 6.75 | 3  |
| ENSG0000188315.3  | C3orf62  | 3.18E-17 | 5  | 5  | 4.46E-09 | Colon_Sigmoid            | 0.7919   | Cells_Transformed_fibroblasts | 2.60  | 0.19 | 0.19 | -5.87 | 2.17 | -1.80 | 3.50 | 5  |
| ENSG0000173421.12 | CCDC36   | 1.14E-16 | 23 | 5  | 1.08E-07 | Heart_Left_Ventricle     | 0.94407  | Muscle_Skeletal               | 17.15 | 0.00 | 0.62 | -5.31 | 4.31 | -1.87 | 2.26 | 5  |
| ENSG0000232629.4  | HLA-DQB2 | 2.86E-16 | 38 | 25 | 0.00011  | Spleen                   | 0.998246 | Brain_Hypothalamus            | 7.40  | 0.00 | 0.28 | -3.87 | 3.83 | -0.09 | 2.05 | 25 |
| ENSG0000243477.1  | NAT6     | 3.36E-16 | 16 | 6  | 1.18E-13 | Spleen                   | 0.062974 | Lung                          | 11.11 | 0.00 | 0.40 | -1.86 | 7.42 | 4.32  | 2.25 | 6  |
| ENSG0000214706.6  | IFRD2    | 1.26E-15 | 7  | 6  | 1.43E-12 | Brain_Cerebellum         | 0.116671 | Adipose_Visceral_Omentum      | 3.44  | 0.09 | 0.21 | -7.08 | 7.02 | 0.23  | 5.15 | 6  |
| ENSG0000182952.4  | HMGN4    | 2.26E-15 | 18 | 6  | 4.64E-11 | Heart_Atrial_Appendage   | 0.690565 | Cells_Transformed_fibroblasts | 11.87 | 0.01 | 0.44 | 0.40  | 6.58 | 4.19  | 1.93 | 6  |

|                    |               |          |    |    |          |                               |          |                                      |       |      |      |       |       |       |      |    |
|--------------------|---------------|----------|----|----|----------|-------------------------------|----------|--------------------------------------|-------|------|------|-------|-------|-------|------|----|
| ENSG00000114388.8  | NPRL2         | 3.03E-15 | 3  | 3  | 3.05E-12 | Artery_Aorta                  | 0.017983 | Testis                               | 1.42  | 0.67 | 0.67 | -3.46 | 6.98  | 1.96  | 5.23 | 3  |
| ENSG00000203813.4  | HIST1H3H      | 3.14E-15 | 2  | 2  | 1.58E-15 | Esophagus_Muscularis          | 0.760032 | Stomach                              | 1.18  | 0.82 | 0.82 | -0.31 | 7.97  | 3.83  | 5.85 | 2  |
| ENSG00000225399.3  | RP11-3B7.1    | 4.00E-15 | 15 | 3  | 2.22E-11 | Heart_Left_Ventricle          | 0.777637 | Colon_Sigmoid                        | 12.73 | 0.00 | 0.45 | -6.69 | -0.28 | -2.76 | 1.57 | 3  |
| ENSG00000173402.7  | DAG1          | 5.72E-15 | 3  | 3  | 1.23E-10 | Heart_Left_Ventricle          | 0.000106 | Esophagus_Mucosa                     | 1.48  | 0.43 | 0.43 | -6.44 | -3.88 | -5.07 | 1.29 | 3  |
| ENSG00000111801.11 | BTN3A3        | 6.40E-15 | 14 | 10 | 1.24E-13 | Nerve_Tibial                  | 0.940965 | Adipose_Visceral_Omentum             | 6.49  | 0.09 | 0.23 | -7.14 | 7.41  | 0.12  | 4.04 | 10 |
| ENSG00000270441.1  | RP11-694I15.7 | 1.26E-14 | 6  | 5  | 8.79E-14 | Brain_Cerebellum              | 0.531948 | Lung                                 | 3.74  | 0.09 | 0.23 | -7.46 | -0.63 | -4.72 | 2.33 | 5  |
| ENSG00000004838.9  | ZMYND10       | 1.62E-14 | 3  | 3  | 1.05E-14 | Brain_Hypothalamus            | 0.288881 | Brain_Cerebellum                     | 1.47  | 0.59 | 0.59 | -7.73 | 2.25  | -1.48 | 5.45 | 3  |
| ENSG00000137185.7  | ZSCAN9        | 3.43E-14 | 16 | 12 | 1.57E-12 | Thyroid                       | 0.442919 | Cells_Transformed_fibroblasts        | 4.99  | 0.05 | 0.18 | -7.07 | 1.22  | -2.53 | 2.56 | 12 |
| ENSG00000261584.1  | RP11-457M11.5 | 7.56E-14 | 40 | 2  | 0.00015  | Adipose_Subcutaneous          | 0.970844 | Brain_Cortex                         | 33.74 | 0.00 | 1.18 | -1.79 | 3.79  | 1.30  | 1.47 | 2  |
| ENSG00000197062.7  | RP5-874C20.3  | 9.15E-14 | 34 | 8  | 1.40E-08 | Artery_Aorta                  | 0.755602 | Uterus                               | 20.84 | 0.00 | 0.71 | -0.89 | 5.67  | 3.38  | 1.65 | 8  |
| ENSG00000096654.11 | ZNF184        | 1.74E-13 | 5  | 5  | 6.99E-14 | Brain_Hypothalamus            | 0.265427 | Colon_Sigmoid                        | 1.86  | 0.37 | 0.37 | -7.49 | 3.80  | -0.73 | 4.52 | 5  |
| ENSG00000204709.4  | C6orf100      | 3.05E-13 | 10 | 9  | 8.56E-09 | Adipose_Visceral_Omentum      | 0.742705 | Adipose_Subcutaneous                 | 2.98  | 0.10 | 0.22 | -5.76 | 4.49  | -1.34 | 3.11 | 9  |
| ENSG00000111540.11 | RAB5B         | 5.13E-13 | 2  | 2  | 5.41E-14 | Muscle_Skeletal               | 0.829043 | Artery_Aorta                         | 1.01  | 0.99 | 0.99 | -0.22 | 7.52  | 3.65  | 5.47 | 2  |
| ENSG00000068745.10 | IP6K2         | 6.19E-13 | 24 | 9  | 1.51E-09 | Cells_Transformed_fibroblasts | 0.82008  | Brain_Anterior_cingulate_cortex_BA24 | 13.26 | 0.00 | 0.47 | -1.62 | 6.04  | 2.84  | 2.09 | 9  |
| ENSG00000197153.3  | HIST1H3J      | 7.23E-13 | 1  | 1  | 7.23E-13 | Testis                        | 7.23E-13 | Testis                               | 1.00  | 1.00 | 1.00 | -7.18 | -7.18 | NA    | 1    |    |

|                    |                   |          |    |    |          |                               |          |                                      |       |      |      |       |      |       |      |    |
|--------------------|-------------------|----------|----|----|----------|-------------------------------|----------|--------------------------------------|-------|------|------|-------|------|-------|------|----|
| ENSG00000228223.1  | HCG11             | 1.06E-12 | 6  | 6  | 1.67E-11 | Cells_Transformed_fibroblasts | 0.343292 | Whole_Blood                          | 2.28  | 0.23 | 0.23 | -6.73 | 3.96 | 0.18  | 4.37 | 6  |
| ENSG00000067560.6  | RHOA              | 1.21E-12 | 1  | 1  | 1.21E-12 | Muscle_Skeletal               | 1.21E-12 | Muscle_Skeletal                      | 1.00  | 1.00 | 1.00 | 7.10  | 7.10 | 7.10  | NA   | 1  |
| ENSG00000137338.4  | PGBD1             | 1.30E-12 | 12 | 9  | 4.87E-06 | Brain_Cerebellar_Hemisphere   | 0.942405 | Brain_Amygdala                       | 3.63  | 0.04 | 0.22 | -4.57 | 4.49 | 0.38  | 2.81 | 9  |
| ENSG00000213722.4  | DDAH2             | 1.32E-12 | 10 | 9  | 1.43E-07 | Whole_Blood                   | 0.555632 | Cells_Transformed_fibroblasts        | 3.13  | 0.01 | 0.11 | -5.26 | 2.02 | -0.69 | 2.09 | 9  |
| ENSG00000124508.12 | BTN2A2            | 1.71E-12 | 30 | 8  | 2.64E-13 | Testis                        | 0.905741 | Brain_Anterior_cingulate_cortex_BA24 | 16.46 | 0.00 | 0.66 | -7.31 | 5.95 | 1.52  | 2.68 | 8  |
| ENSG00000130517.9  | PGPEP1            | 2.68E-12 | 24 | 6  | 4.79E-08 | Cells_Transformed_fibroblasts | 0.585967 | Ovary                                | 16.82 | 0.00 | 0.69 | -4.57 | 5.46 | 2.67  | 2.34 | 6  |
| ENSG00000197903.6  | HIST1H2BK         | 3.16E-12 | 7  | 7  | 7.25E-14 | Adipose_Visceral_Omentum      | 0.585771 | Colon_Transverse                     | 2.99  | 0.20 | 0.20 | -7.48 | 3.97 | -2.42 | 4.67 | 7  |
| ENSG00000158691.10 | ZSCAN12           | 4.71E-12 | 7  | 6  | 3.17E-08 | Liver                         | 0.831079 | Esophagus_Gastroesophageal_Junction  | 3.93  | 0.07 | 0.16 | -0.21 | 5.53 | 2.88  | 2.24 | 6  |
| ENSG00000178057.10 | NDUFAF3           | 5.13E-12 | 6  | 5  | 2.22E-10 | Esophagus_Muscularis          | 0.016807 | Lung                                 | 4.08  | 0.04 | 0.15 | -6.35 | 3.29 | -2.75 | 3.33 | 5  |
| ENSG00000129933.16 | MAU2              | 5.33E-12 | 10 | 8  | 5.86E-06 | Spleen                        | 0.793771 | Colon_Sigmoid                        | 4.41  | 0.07 | 0.23 | -4.27 | 4.53 | -1.60 | 2.51 | 8  |
| ENSG00000124549.10 | BTN2A3P           | 5.35E-12 | 21 | 5  | 1.26E-16 | Esophagus_Mucosa              | 0.021722 | Prostate                             | 15.41 | 0.00 | 0.64 | -2.72 | 8.28 | 5.29  | 2.33 | 5  |
| ENSG00000216901.1  | AL022393.7        | 5.42E-12 | 38 | 7  | 1.02E-06 | Prostate                      | 0.959538 | Adipose_Visceral_Omentum             | 22.12 | 0.00 | 0.81 | -4.84 | 4.89 | -1.23 | 2.49 | 7  |
| ENSG00000272221.1  | XXbac-BPG181B23.7 | 5.67E-12 | 30 | 20 | 2.14E-08 | Prostate                      | 0.669322 | Stomach                              | 8.04  | 0.00 | 0.27 | -5.60 | 2.60 | -0.87 | 2.09 | 20 |

|                    |                  |          |    |    |          |                                      |          |                               |       |      |       |       |       |       |      |    |
|--------------------|------------------|----------|----|----|----------|--------------------------------------|----------|-------------------------------|-------|------|-------|-------|-------|-------|------|----|
| ENSG00000197279.3  | ZNF165           | 6.64E-12 | 15 | 8  | 2.37E-09 | Heart_Left_Ventricle                 | 0.956743 | Esophagus_Muscularis          | 8.18  | 0.03 | 0.36  | -5.03 | 5.97  | 2.45  | 2.92 | 8  |
| ENSG00000197728.5  | RPS26            | 6.99E-12 | 40 | 1  | 3.07E-13 | Brain_Anterior_cingulate_cortex_BA24 | 4.89E-09 | Esophagus_Mucosa              | 38.57 | 0.00 | 38.57 | -7.29 | -5.85 | -6.73 | 0.29 | 1  |
| ENSG00000178149.12 | DALRD3           | 7.45E-12 | 15 | 5  | 3.61E-09 | Muscle_Skeletal                      | 0.925733 | Prostate                      | 11.22 | 0.01 | 0.44  | -5.90 | -0.09 | -2.67 | 1.60 | 5  |
| ENSG00000196735.7  | HLA-DQA1         | 1.03E-11 | 25 | 24 | 3.41E-06 | Brain_Frontal_Cortex_BA9             | 0.991063 | Colon_Transverse              | 2.66  | 0.12 | 0.12  | -4.64 | 2.83  | -0.66 | 2.09 | 24 |
| ENSG00000183763.4  | TRAIP            | 1.35E-11 | 2  | 2  | 3.97E-11 | Brain_Amygdala                       | 0.000165 | Testis                        | 1.19  | 0.81 | 0.81  | 3.77  | 6.61  | 5.19  | 2.01 | 2  |
| ENSG00000204789.3  | ZNF204P          | 1.40E-11 | 21 | 10 | 2.44E-11 | Esophagus_Mucosa                     | 0.625389 | Cells_Transformed_fibroblasts | 8.17  | 0.01 | 0.31  | -6.68 | 4.44  | -2.49 | 2.94 | 10 |
| ENSG00000130520.6  | LSM4             | 1.84E-11 | 5  | 5  | 5.78E-10 | Nerve_Tibial                         | 0.661873 | Adipose_Visceral_Omentum      | 3.05  | 0.20 | 0.20  | -1.49 | 6.20  | 2.41  | 3.12 | 5  |
| ENSG00000139531.8  | SUOX             | 2.42E-11 | 34 | 4  | 1.21E-13 | Whole_Blood                          | 0.483526 | Artery_Coronary               | 24.18 | 0.00 | 0.91  | -0.70 | 7.42  | 5.64  | 1.80 | 4  |
| ENSG00000135945.5  | REV1             | 4.11E-11 | 10 | 6  | 3.17E-09 | Testis                               | 0.21114  | Brain_Hypothalamus            | 5.96  | 0.03 | 0.26  | -4.90 | 5.92  | -1.01 | 4.10 | 6  |
| ENSG00000271755.1  | RP1-153G14.4     | 4.58E-11 | 11 | 9  | 3.47E-12 | Muscle_Skeletal                      | 0.906613 | Heart_Atrial_Appendage        | 4.82  | 0.04 | 0.24  | -1.43 | 6.96  | 1.66  | 2.42 | 9  |
| ENSG00000219891.2  | ZSCAN12P1        | 6.76E-11 | 13 | 8  | 1.39E-05 | Whole_Blood                          | 0.999513 | Adipose_Visceral_Omentum      | 7.37  | 0.02 | 0.28  | -4.35 | 4.16  | 0.48  | 2.37 | 8  |
| ENSG00000198502.5  | HLA-DRB5         | 6.93E-11 | 34 | 22 | 1.61E-07 | Esophagus_Mucosa                     | 0.993227 | Brain_Frontal_Cortex_BA9      | 6.93  | 0.00 | 0.25  | -5.24 | 3.50  | -0.92 | 1.98 | 22 |
| ENSG00000225595.2  | XXbac-BPG308K3.6 | 7.62E-11 | 1  | 1  | 7.62E-11 | Testis                               | 7.62E-11 | Testis                        | 1.00  | 1.00 | 1.00  | -6.51 | -6.51 | -6.51 | NA   | 1  |
| ENSG00000224843.2  | LINC00240        | 8.65E-11 | 17 | 9  | 1.21E-10 | Esophagus_Gastroesophageal           | 0.424697 | Liver                         | 8.53  | 0.03 | 0.35  | -6.44 | -0.80 | -4.35 | 1.53 | 9  |

|                    |            |          |    |    |          |                                       |          |                        |       |      |      |       |       |       |      |    |
|--------------------|------------|----------|----|----|----------|---------------------------------------|----------|------------------------|-------|------|------|-------|-------|-------|------|----|
|                    |            |          |    |    |          | phageal_Junction                      |          |                        |       |      |      |       |       |       |      |    |
| ENSG00000137404.10 | NRM        | 1.24E-10 | 9  | 9  | 2.94E-06 | Prostate                              | 0.972561 | Heart_Left_Ventricle   | 1.99  | 0.21 | 0.21 | -2.94 | 4.67  | 0.46  | 2.66 | 9  |
| ENSG00000234745.5  | HLA-B      | 1.27E-10 | 21 | 17 | 1.74E-09 | Esophagus_Mucosa                      | 0.97177  | Brain_Cerebellum       | 5.58  | 0.00 | 0.22 | -2.33 | 6.02  | 2.59  | 2.44 | 17 |
| ENSG00000137411.12 | VAR2       | 1.32E-10 | 27 | 17 | 6.88E-06 | Brain_Cerebellum                      | 0.913511 | Artery_Aorta           | 6.24  | 0.00 | 0.23 | -4.32 | 4.50  | 1.03  | 2.44 | 17 |
| ENSG00000204257.10 | HLA-DMA    | 1.44E-10 | 21 | 20 | 8.00E-07 | Cells_Transformed_fibroblasts         | 0.948938 | Brain_Amygdala         | 3.13  | 0.09 | 0.24 | -4.94 | 3.60  | -0.43 | 2.14 | 20 |
| ENSG00000146109.3  | ABT1       | 1.47E-10 | 14 | 8  | 6.99E-10 | Testis                                | 0.489976 | Whole_Blood            | 7.05  | 0.07 | 0.32 | -0.74 | 6.17  | 3.01  | 2.08 | 8  |
| ENSG00000114316.8  | USP4       | 1.86E-10 | 4  | 4  | 3.90E-11 | Brain_Cerebellum                      | 0.192779 | Colon_Sigmoid          | 1.80  | 0.28 | 0.28 | -3.59 | 6.61  | 2.44  | 4.62 | 4  |
| ENSG00000225851.1  | HLA-S      | 1.92E-10 | 21 | 16 | 3.10E-08 | Breast_Mammary_Tissue                 | 0.853304 | Spleen                 | 6.91  | 0.01 | 0.27 | -2.25 | 5.54  | 2.87  | 1.87 | 16 |
| ENSG00000026950.12 | BTN3A1     | 3.97E-10 | 28 | 3  | 7.62E-14 | Testis                                | 0.671405 | Liver                  | 22.32 | 0.00 | 0.98 | -7.48 | 1.05  | -2.64 | 1.58 | 3  |
| ENSG00000228022.1  | HCG20      | 4.45E-10 | 13 | 13 | 2.06E-06 | Adrenal_Gland                         | 0.847419 | Artery_Coronary        | 2.91  | 0.14 | 0.14 | -4.75 | 4.62  | -0.59 | 2.52 | 13 |
| ENSG00000088538.12 | DOCK3      | 4.74E-10 | 13 | 7  | 3.42E-07 | Artery_Coronary                       | 0.606212 | Artery_Aorta           | 7.76  | 0.00 | 0.29 | -3.45 | 5.10  | 1.02  | 2.27 | 7  |
| ENSG00000115539.9  | PDCL3      | 4.81E-10 | 9  | 8  | 4.54E-10 | Cells_EBV-transformed_lymphocytes     | 0.261975 | Heart_Atrial_Appendage | 2.72  | 0.06 | 0.32 | -6.23 | 3.21  | -1.27 | 3.61 | 8  |
| ENSG00000176933.4  | TOB2P1     | 5.49E-10 | 14 | 7  | 4.43E-07 | Esophagus_Mucosa                      | 0.800448 | Colon_Sigmoid          | 8.36  | 0.01 | 0.35 | -5.05 | 4.47  | -1.46 | 3.04 | 7  |
| ENSG00000230598.1  | OR2H4P     | 6.24E-10 | 1  | 1  | 6.24E-10 | Testis                                | 6.24E-10 | Testis                 | 1.00  | 1.00 | 1.00 | -6.18 | -6.18 | N/A   | 1    |    |
| ENSG00000176349.7  | AC110781.3 | 8.05E-10 | 3  | 3  | 1.97E-10 | Brain_Nucleus_accumbens_basal_ganglia | 0.879466 | Testis                 | 1.57  | 0.36 | 0.36 | 0.15  | 6.36  | 2.75  | 3.23 | 3  |

|                    |            |          |    |    |          |                                      |          |                          |       |      |      |       |       |       |      |    |
|--------------------|------------|----------|----|----|----------|--------------------------------------|----------|--------------------------|-------|------|------|-------|-------|-------|------|----|
| ENSG00000204469.8  | PRRC2A     | 8.39E-10 | 5  | 5  | 0.000113 | Lung                                 | 0.073173 | Esophagus_Muscularis     | 1.30  | 0.64 | 0.64 | -3.48 | 3.86  | 1.18  | 3.54 | 5  |
| ENSG00000227403.1  | AC009299.3 | 8.41E-10 | 20 | 3  | 5.82E-09 | Adrenal_Gland                        | 0.420087 | Lung                     | 16.49 | 0.00 | 0.74 | -5.82 | -0.81 | -4.24 | 1.66 | 3  |
| ENSG00000115526.6  | CHST10     | 8.43E-10 | 14 | 9  | 1.17E-10 | Brain_Anterior_cingulate_cortex_BA24 | 0.686858 | Testis                   | 7.32  | 0.01 | 0.26 | -6.44 | 5.75  | -1.81 | 4.45 | 9  |
| ENSG00000204525.10 | HLA-C      | 9.74E-10 | 28 | 20 | 2.06E-08 | Uterus                               | 0.900292 | Nerve_Tibial             | 5.32  | 0.00 | 0.20 | -5.61 | 5.53  | -0.48 | 2.57 | 20 |
| ENSG00000181315.6  | ZNF322     | 1.04E-09 | 19 | 7  | 2.21E-10 | Nerve_Tibial                         | 0.379392 | Artery_Aorta             | 12.71 | 0.00 | 0.43 | -6.35 | 3.42  | -3.65 | 2.37 | 7  |
| ENSG00000187837.2  | HIST1H1C   | 1.06E-09 | 9  | 8  | 2.35E-10 | Brain_Frontal_Cortex_BA9             | 0.15278  | Whole_Blood              | 4.45  | 0.06 | 0.18 | -6.34 | 1.75  | -3.58 | 2.62 | 8  |
| ENSG00000204713.6  | TRIM27     | 1.09E-09 | 13 | 10 | 2.18E-10 | Spleen                               | 0.841977 | Whole_Blood              | 4.04  | 0.00 | 0.21 | -1.03 | 6.35  | 2.65  | 2.48 | 10 |
| ENSG00000197935.6  | ZNF311     | 1.17E-09 | 7  | 7  | 3.18E-07 | Pancreas                             | 0.613465 | Esophagus_Muscularis     | 1.54  | 0.54 | 0.54 | -2.91 | 5.11  | 0.83  | 2.78 | 7  |
| ENSG00000254901.3  | MEF2BNB    | 1.26E-09 | 21 | 6  | 3.90E-06 | Lung                                 | 0.984699 | Testis                   | 14.01 | 0.00 | 0.54 | -4.62 | 3.32  | 0.09  | 1.80 | 6  |
| ENSG00000235109.3  | ZSCAN31    | 1.28E-09 | 30 | 7  | 4.60E-07 | Brain_Amygdala                       | 0.95262  | Nerve_Tibial             | 18.37 | 0.00 | 0.72 | -5.04 | 2.00  | -1.32 | 1.99 | 7  |
| ENSG00000088543.10 | C3orf18    | 1.30E-09 | 10 | 5  | 3.94E-06 | Thyroid                              | 0.946445 | Brain_Cortex             | 6.52  | 0.01 | 0.34 | -4.61 | 4.10  | 0.42  | 2.24 | 5  |
| ENSG00000170500.8  | LONRF2     | 1.47E-09 | 10 | 9  | 8.62E-10 | Thyroid                              | 0.904141 | Artery_Coronary          | 3.47  | 0.06 | 0.22 | -6.13 | 0.12  | -2.39 | 2.14 | 9  |
| ENSG00000112763.11 | BTN2A1     | 1.55E-09 | 15 | 9  | 4.62E-06 | Testis                               | 0.95587  | Stomach                  | 8.11  | 0.02 | 0.32 | -4.58 | 1.95  | -0.03 | 1.96 | 9  |
| ENSG00000158406.2  | HIST1H4H   | 1.72E-09 | 5  | 5  | 2.19E-08 | Whole_Blood                          | 0.072494 | Brain_Frontal_Cortex_BA9 | 2.19  | 0.12 | 0.12 | 1.80  | 5.60  | 3.79  | 1.49 | 5  |
| ENSG00000188641.8  | DPYD       | 1.82E-09 | 11 | 10 | 2.32E-10 | Esophagus_Mucosa                     | 0.928352 | Artery_Aorta             | 4.52  | 0.13 | 0.23 | -1.89 | 6.34  | -0.23 | 2.33 | 10 |
| ENSG00000140718.14 | FTO        | 1.99E-09 | 9  | 6  | 1.15E-09 | Muscle_Skeletal                      | 0.366709 | Whole_Blood              | 5.53  | 0.04 | 0.21 | -3.44 | 6.09  | -1.26 | 3.05 | 6  |

|                    |               |          |    |    |          |                                   |          |                                       |       |      |       |       |       |       |      |    |
|--------------------|---------------|----------|----|----|----------|-----------------------------------|----------|---------------------------------------|-------|------|-------|-------|-------|-------|------|----|
| ENSG0000226314.3   | ZNF192P1      | 1.99E-09 | 23 | 8  | 2.63E-09 | Esophagus_Mucosa                  | 0.716865 | Nerve_Tibial                          | 11.39 | 0.00 | 0.45  | -5.25 | 5.95  | 1.06  | 4.30 | 8  |
| ENSG00000204314.6  | PRRT1         | 2.29E-09 | 11 | 11 | 3.14E-06 | Adipose_Visceral_Omentum          | 0.781551 | Prostate                              | 2.79  | 0.27 | 0.27  | -4.66 | 3.43  | 0.87  | 2.46 | 11 |
| ENSG00000105662.11 | CRTC1         | 2.90E-09 | 6  | 6  | 3.57E-06 | Brain_Cerebellum                  | 0.348574 | Colon_Transverse                      | 1.91  | 0.41 | 0.41  | -4.61 | 4.64  | -0.38 | 3.23 | 6  |
| ENSG00000144214.5  | LYG1          | 3.14E-09 | 29 | 5  | 9.95E-05 | Artery_Coronary                   | 0.802478 | Stomach                               | 20.37 | 0.01 | 0.71  | -3.75 | 3.89  | 1.07  | 1.74 | 5  |
| ENSG00000228666.1  | KRT18P1       | 3.20E-09 | 1  | 1  | 3.20E-09 | Testis                            | 3.20E-09 | Testis                                | 1.00  | 1.00 | 1.00  | 5.92  | 5.92  | 5.92  | NA   | 1  |
| ENSG00000145020.10 | AMT           | 3.48E-09 | 34 | 1  | 8.73E-23 | Brain_Hypothalamus                | 0.004271 | Brain_Cerebellar_Hemispheres          | 30.34 | 0.00 | 30.34 | -9.83 | -2.86 | -5.58 | 1.33 | 1  |
| ENSG00000227207.2  | RPL31P12      | 3.49E-09 | 5  | 2  | 4.83E-09 | Esophagus_Muscularis              | 1.77E-05 | Brain_Cerebellar_Hemispheres          | 4.72  | 0.00 | 0.20  | -5.85 | -4.29 | -4.93 | 0.78 | 2  |
| ENSG00000090975.8  | PITPNM2       | 3.66E-09 | 4  | 4  | 2.02E-10 | Thyroid                           | 0.163882 | Brain_Nucleus_accumbens_basal_ganglia | 2.59  | 0.09 | 0.09  | -6.36 | 4.43  | 0.90  | 5.03 | 4  |
| ENSG00000123411.10 | IKZF4         | 4.12E-09 | 6  | 5  | 4.44E-11 | Adipose_Subcutaneous              | 0.93144  | Pancreas                              | 2.82  | 0.05 | 0.27  | -6.59 | 2.58  | -2.00 | 3.58 | 5  |
| ENSG00000206344.6  | HCG27         | 4.46E-09 | 30 | 17 | 0.000147 | Cells_EBV-transformed_lymphocytes | 0.959348 | Brain_Hypothalamus                    | 8.46  | 0.00 | 0.29  | -2.22 | 3.80  | 1.23  | 1.77 | 17 |
| ENSG00000111328.2  | CDK2AP1       | 8.19E-09 | 23 | 3  | 1.28E-10 | Lung                              | 0.000259 | Nerve_Tibial                          | 18.82 | 0.00 | 0.67  | 3.65  | 6.43  | 5.70  | 0.75 | 3  |
| ENSG00000198218.6  | QRICH1        | 8.54E-09 | 20 | 3  | 1.94E-11 | Whole_Blood                       | 0.718757 | Brain_Cerebellar_Hemispheres          | 16.27 | 0.00 | 0.72  | 0.36  | 6.71  | 3.99  | 1.52 | 3  |
| ENSG00000237154.1  | MCFD2P1       | 1.07E-08 | 5  | 5  | 2.77E-09 | Testis                            | 0.880983 | Brain_Cortex                          | 1.86  | 0.26 | 0.26  | -5.94 | 3.09  | 0.32  | 3.68 | 5  |
| ENSG00000243904.1  | RP11-600F24.1 | 1.31E-08 | 2  | 2  | 1.74E-09 | Stomach                           | 0.969426 | Muscle_Skeletal                       | 1.04  | 0.96 | 0.96  | -6.02 | 0.04  | -2.99 | 4.28 | 2  |

|                    |               |          |    |    |          |                          |          |                               |       |      |       |       |       |       |      |    |
|--------------------|---------------|----------|----|----|----------|--------------------------|----------|-------------------------------|-------|------|-------|-------|-------|-------|------|----|
| ENSG00000175866.11 | BAIAP2        | 1.37E-08 | 8  | 7  | 1.79E-06 | Esophagus_Muscularis     | 0.975923 | Spleen                        | 3.89  | 0.09 | 0.13  | -1.10 | 4.78  | 0.85  | 1.95 | 7  |
| ENSG00000204516.5  | MICB          | 1.62E-08 | 34 | 4  | 1.81E-08 | Muscle_Skeletal          | 0.564913 | Brain_Frontal_Cortex_BA9      | 23.63 | 0.00 | 1.66  | -5.63 | 2.12  | -2.27 | 1.62 | 4  |
| ENSG00000144218.14 | AFF3          | 1.62E-08 | 14 | 9  | 6.28E-11 | Brain_Cerebellum         | 0.834543 | Lung                          | 6.67  | 0.01 | 0.26  | -6.54 | 2.26  | -3.50 | 2.73 | 9  |
| ENSG00000197914.2  | HIST1H4K      | 1.72E-08 | 11 | 7  | 1.28E-09 | Artery_Aorta             | 0.025149 | Brain_Frontal_Cortex_BA9      | 7.13  | 0.01 | 0.24  | 2.24  | 6.07  | 3.93  | 1.32 | 7  |
| ENSG00000102572.10 | STK24         | 1.82E-08 | 7  | 7  | 1.79E-11 | Adipose_Visceral_Omentum | 0.792301 | Nerve_Tibial                  | 3.78  | 0.20 | 0.20  | -6.72 | 4.89  | -1.29 | 4.77 | 7  |
| ENSG00000052795.8  | FNIP2         | 1.89E-08 | 4  | 4  | 1.81E-08 | Thyroid                  | 0.077944 | Adrenal_Gland                 | 2.12  | 0.20 | 0.20  | -5.63 | -1.76 | -3.93 | 1.61 | 4  |
| ENSG00000114349.5  | GNAT1         | 2.04E-08 | 2  | 2  | 1.05E-08 | Adipose_Visceral_Omentum | 5.00E-05 | Lung                          | 1.45  | 0.55 | 0.55  | -5.72 | -4.06 | -4.89 | 1.18 | 2  |
| ENSG00000272312.1  | RP11-239L20.6 | 2.11E-08 | 1  | 1  | 2.11E-08 | Brain_Hippocampus        | 2.11E-08 | Brain_Hippocampus             | 1.00  | 1.00 | 1.00  | 5.60  | 5.60  | 5.60  | NA   | 1  |
| ENSG00000051825.10 | MPHOSP H9     | 2.38E-08 | 11 | 5  | 3.36E-12 | Heart_Left_Ventricle     | 0.31231  | Spleen                        | 7.34  | 0.05 | 0.27  | -6.96 | -1.01 | -4.75 | 2.01 | 5  |
| ENSG00000204560.5  | DHX16         | 2.48E-08 | 9  | 9  | 4.58E-08 | Lung                     | 0.457506 | Brain_Hypothalamus            | 2.67  | 0.23 | 0.23  | -5.47 | 2.60  | -0.87 | 2.57 | 9  |
| ENSG00000248290.1  | TNXA          | 2.68E-08 | 25 | 10 | 2.90E-07 | Esophagus_Muscularis     | 0.929793 | Lung                          | 9.07  | 0.01 | 0.42  | -3.45 | 5.13  | 1.04  | 2.01 | 10 |
| ENSG00000272065.1  | U91328.20     | 2.85E-08 | 7  | 7  | 4.46E-05 | Lung                     | 0.812417 | Brain_Cortex                  | 2.89  | 0.20 | 0.20  | -4.08 | 0.72  | -2.10 | 1.84 | 7  |
| ENSG00000065060.12 | UHRF1BP1      | 3.10E-08 | 39 | 1  | 1.62E-09 | Spleen                   | 0.007642 | Brain_Substantia_nigra        | 33.71 | 0.00 | 33.71 | 2.67  | 6.03  | 5.10  | 0.81 | 1  |
| ENSG00000248458.2  | AL139147.1    | 3.27E-08 | 6  | 6  | 1.56E-05 | Artery_Coronary          | 0.882682 | Cells_Transformed_fibroblasts | 1.72  | 0.47 | 0.47  | -3.71 | 4.32  | -0.16 | 2.72 | 6  |

|                    |          |          |    |    |          |                                     |          |                                |       |      |      |       |       |       |      |    |
|--------------------|----------|----------|----|----|----------|-------------------------------------|----------|--------------------------------|-------|------|------|-------|-------|-------|------|----|
| ENSG0000178467.13  | P4HTM    | 3.34E-08 | 18 | 4  | 1.45E-10 | Whole_Blood                         | 0.415753 | Breast_Mammary_Tissue          | 13.50 | 0.00 | 0.68 | -6.41 | 0.81  | -3.24 | 1.72 | 4  |
| ENSG0000164053.13  | ATRIP    | 3.56E-08 | 14 | 8  | 2.76E-06 | Stomach                             | 0.870066 | Colon_Transverse               | 7.41  | 0.00 | 0.31 | -4.01 | 4.69  | -0.83 | 2.05 | 8  |
| ENSG0000204344.10  | STK19    | 3.57E-08 | 20 | 18 | 2.87E-05 | Brain_Cortex                        | 0.963306 | Adipose_Visceral_Omentum       | 3.55  | 0.03 | 0.12 | -4.18 | 2.78  | -0.85 | 1.94 | 18 |
| ENSG0000167487.7   | KLHL26   | 3.62E-08 | 8  | 7  | 1.87E-06 | Brain_Cerebellar_Hemisphere         | 0.583692 | Spleen                         | 2.79  | 0.09 | 0.31 | -2.65 | 4.77  | 1.39  | 2.55 | 7  |
| ENSG00001015701.11 | FKBP8    | 3.71E-08 | 2  | 2  | 2.30E-08 | Heart_Left_Ventricle                | 0.087437 | Spleen                         | 1.00  | 1.00 | 1.00 | -5.59 | -1.71 | -3.65 | 2.74 | 2  |
| ENSG0000204396.6   | VWA7     | 5.00E-08 | 6  | 6  | 0.00012  | Heart_Left_Ventricle                | 0.180606 | Thyroid                        | 1.94  | 0.27 | 0.27 | -2.80 | 3.85  | 1.10  | 2.66 | 6  |
| ENSG0000187323.7   | DCC      | 6.74E-08 | 3  | 3  | 6.77E-08 | Adrenal_Gland                       | 0.023108 | Nerve_Tibial                   | 2.03  | 0.35 | 0.35 | -3.72 | 5.40  | -0.20 | 4.90 | 3  |
| ENSG0000205363.4   | C15orf59 | 6.76E-08 | 10 | 10 | 1.37E-05 | Lung                                | 0.854706 | Thyroid                        | 3.21  | 0.11 | 0.11 | -1.58 | 4.35  | 1.10  | 2.09 | 10 |
| ENSG0000204348.5   | DXO      | 6.89E-08 | 14 | 7  | 5.05E-05 | Cells_Transformed_fibroblasts       | 0.870475 | Adipose_Subcutaneous           | 7.63  | 0.00 | 0.63 | -4.05 | 3.47  | -0.99 | 2.03 | 7  |
| ENSG0000150967.13  | ABCB9    | 7.16E-08 | 16 | 5  | 1.43E-09 | Colon_Sigmoid                       | 0.938425 | Ovary                          | 10.44 | 0.00 | 0.51 | -6.05 | 5.65  | -3.86 | 3.05 | 5  |
| ENSG0000135272.5   | MDFIC    | 7.72E-08 | 11 | 10 | 3.64E-06 | Muscle_Skeletal                     | 0.557423 | Small_Intestine_Terminal_Ileum | 5.24  | 0.08 | 0.23 | -4.63 | 1.23  | -2.25 | 1.80 | 10 |
| ENSG0000178342.4   | KCNG2    | 8.03E-08 | 7  | 7  | 1.99E-08 | Spleen                              | 0.762763 | Thyroid                        | 2.17  | 0.25 | 0.25 | -3.18 | 5.61  | 0.62  | 2.94 | 7  |
| ENSG0000163812.9   | ZDHHC3   | 8.78E-08 | 5  | 5  | 1.41E-08 | Esophagus_Gastroesophageal_Junction | 0.64262  | Prostate                       | 1.59  | 0.45 | 0.45 | -5.67 | 2.44  | -0.99 | 3.12 | 5  |
| ENSG00001013449.7  | SALL1    | 9.23E-08 | 4  | 4  | 3.00E-07 | Testis                              | 0.75246  | Cells_Transformed_fibroblasts  | 1.57  | 0.53 | 0.53 | -2.45 | 5.12  | 1.02  | 3.22 | 4  |
| ENSG0000234816.2   | U91328.2 | 1.00E-07 | 1  | 1  | 1.00E-07 | Testis                              | 1.00E-07 | Testis                         | 1.00  | 1.00 | 1.00 | -5.33 | -5.33 | -5.33 | NA   | 1  |

|                    |               |          |    |    |          |                                                  |          |                                                 |       |      |       |       |       |       |      |    |
|--------------------|---------------|----------|----|----|----------|--------------------------------------------------|----------|-------------------------------------------------|-------|------|-------|-------|-------|-------|------|----|
| ENSG00000204531.11 | POU5F1        | 1.11E-07 | 30 | 14 | 2.81E-08 | Liver                                            | 0.980456 | Prostate                                        | 11.66 | 0.00 | 0.39  | -1.84 | 5.55  | 0.80  | 1.58 | 14 |
| ENSG00000112893.5  | MAN2A1        | 1.16E-07 | 4  | 4  | 1.40E-06 | Whole_Bl<br>ood                                  | 0.928219 | Testis                                          | 1.44  | 0.31 | 0.31  | -0.09 | 4.82  | 2.89  | 2.25 | 4  |
| ENSG00000103245.9  | NARFL         | 1.17E-07 | 37 | 17 | 0.000255 | Brain_Ant<br>erior_cing<br>ulate_corte<br>x_BA24 | 0.967253 | Brain_Fro<br>ntal_Corte<br>x_BA9                | 14.57 | 0.00 | 0.49  | -3.38 | 3.66  | -0.45 | 1.68 | 17 |
| ENSG00000164818.11 | HEATR2        | 1.21E-07 | 28 | 14 | 6.39E-07 | Pancreas                                         | 0.947663 | Brain_Cer<br>ebellar_He<br>misphere             | 11.81 | 0.00 | 0.42  | -0.91 | 4.98  | 1.78  | 1.31 | 14 |
| ENSG00000187626.7  | ZKSCAN4       | 1.26E-07 | 3  | 3  | 2.33E-07 | Testis                                           | 0.099587 | Spleen                                          | 1.68  | 0.44 | 0.44  | -5.17 | -1.65 | -3.25 | 1.78 | 3  |
| ENSG00000118058.16 | KMT2A         | 1.36E-07 | 4  | 4  | 2.19E-05 | Adipose_S<br>ubcutaneo<br>us                     | 0.12396  | Brain_Cer<br>ebellum                            | 1.46  | 0.70 | 0.70  | -4.25 | 2.86  | -0.13 | 3.38 | 4  |
| ENSG00000204427.7  | ABHD16A       | 1.51E-07 | 5  | 5  | 2.16E-07 | Lung                                             | 0.230466 | Liver                                           | 2.14  | 0.16 | 0.16  | 1.20  | 5.19  | 3.04  | 1.53 | 5  |
| ENSG00000160563.9  | MED27         | 1.54E-07 | 2  | 2  | 6.66E-08 | Whole_Bl<br>ood                                  | 0.210312 | Colon_Tra<br>nsverse                            | 1.04  | 0.96 | 0.96  | -1.25 | 5.40  | 2.07  | 4.70 | 2  |
| ENSG00000162706.8  | CADM3         | 1.56E-07 | 5  | 5  | 1.23E-06 | Brain_Hip<br>pocampus                            | 0.661445 | Cells_Tra<br>nsformed_fi<br>broblasts           | 1.44  | 0.52 | 0.52  | 0.44  | 4.85  | 2.36  | 1.90 | 5  |
| ENSG00000225099.1  | ATP6V1E1P1    | 1.60E-07 | 1  | 1  | 1.60E-07 | Brain_Cer<br>ebellum                             | 1.60E-07 | Brain_Cer<br>ebellum                            | 1.00  | 1.00 | 1.00  | 5.24  | 5.24  | 5.24  | NA   | 1  |
| ENSG00000219392.1  | RP1-265C24.5  | 1.62E-07 | 32 | 1  | 6.37E-11 | Adipose_S<br>ubcutaneo<br>us                     | 9.17E-05 | Esophagus<br>_Gastroeso<br>phageal_Ju<br>nction | 28.02 | 0.00 | 28.02 | 3.91  | 6.53  | 4.91  | 0.64 | 1  |
| ENSG00000124562.5  | SNRPC         | 1.63E-07 | 26 | 4  | 6.69E-10 | Esophagus<br>_Musculari<br>s                     | 0.017974 | Spleen                                          | 20.32 | 0.00 | 0.71  | -6.17 | -2.37 | -5.03 | 0.92 | 4  |
| ENSG00000164061.4  | BSN           | 1.66E-07 | 2  | 2  | 5.67E-08 | Brain_Cort<br>ex                                 | 0.032939 | Liver                                           | 1.15  | 0.85 | 0.85  | -2.13 | 5.43  | 1.65  | 5.35 | 2  |
| ENSG00000182477.5  | OR2B8P        | 1.87E-07 | 12 | 1  | 1.03E-10 | Adrenal_G<br>land                                | 0.00057  | Nerve_Tib<br>ial                                | 10.96 | 0.01 | 10.96 | -6.46 | -3.45 | -4.98 | 0.82 | 1  |
| ENSG00000262223.2  | RP11-1055B8.3 | 1.90E-07 | 7  | 6  | 5.91E-08 | Brain_Hip<br>pocampus                            | 0.774562 | Brain_Cer<br>ebellum                            | 2.26  | 0.00 | 0.42  | -5.42 | 2.05  | -1.75 | 2.38 | 6  |

|                    |               |          |    |    |          |                                   |          |                                     |       |      |      |       |       |       |      |    |
|--------------------|---------------|----------|----|----|----------|-----------------------------------|----------|-------------------------------------|-------|------|------|-------|-------|-------|------|----|
| ENSG0000204410.10  | MSH5          | 1.94E-07 | 4  | 4  | 1.71E-07 | Thyroid                           | 0.917968 | Liver                               | 1.60  | 0.48 | 0.48 | -0.10 | 5.23  | 2.82  | 2.61 | 4  |
| ENSG00000267325.1  | RP11-397A16.2 | 2.21E-07 | 7  | 7  | 0.001258 | Cells_Transformed_fibroblasts     | 0.910962 | Esophagus_Gastroesophageal_Junction | 3.05  | 0.27 | 0.27 | -3.23 | 2.25  | -0.60 | 1.98 | 7  |
| ENSG00000137312.10 | FLOT1         | 2.33E-07 | 14 | 14 | 0.000324 | Stomach                           | 0.911693 | Thyroid                             | 2.53  | 0.15 | 0.15 | -3.60 | 3.00  | -0.82 | 2.05 | 14 |
| ENSG00000189134.3  | NKAPL         | 2.40E-07 | 6  | 5  | 2.17E-05 | Esophagus_Muscularis              | 0.321492 | Cells_Transformed_fibroblasts       | 2.91  | 0.06 | 0.17 | -1.09 | 4.25  | 1.58  | 2.37 | 5  |
| ENSG00000159202.13 | UBE2Z         | 2.43E-07 | 8  | 3  | 7.57E-08 | Cells_EBV-transformed_lymphocytes | 6.23E-06 | Cells_Transformed_fibroblasts       | 6.66  | 0.00 | 0.38 | -5.38 | 5.31  | -2.54 | 4.63 | 3  |
| ENSG00000137310.7  | TCF19         | 2.51E-07 | 27 | 10 | 2.44E-06 | Cells_EBV-transformed_lymphocytes | 0.958171 | Lung                                | 12.56 | 0.00 | 0.50 | -2.22 | 4.71  | 0.85  | 1.82 | 10 |
| ENSG00000174953.9  | DHX36         | 2.54E-07 | 22 | 5  | 8.72E-08 | Muscle_Skeletal                   | 0.885006 | Brain_Cortex                        | 16.39 | 0.00 | 0.59 | -5.35 | -0.14 | -2.44 | 1.11 | 5  |
| ENSG00000183955.8  | SETD8         | 2.58E-07 | 12 | 7  | 6.53E-10 | Muscle_Skeletal                   | 0.991608 | Thyroid                             | 6.92  | 0.01 | 0.29 | -6.18 | 4.81  | -1.76 | 3.93 | 7  |
| ENSG00000084463.3  | WBP11         | 2.75E-07 | 12 | 8  | 3.66E-09 | Brain_Amygdala                    | 0.99826  | Adipose_Visceral_Omentum            | 7.35  | 0.00 | 0.25 | -1.79 | 5.90  | 0.28  | 1.98 | 8  |
| ENSG00000232112.3  | TMA7          | 2.88E-07 | 21 | 5  | 5.24E-07 | Uterus                            | 0.930443 | Thyroid                             | 14.89 | 0.00 | 0.77 | -1.95 | 5.02  | 0.73  | 1.62 | 5  |
| ENSG00000158373.7  | HIST1H2BD     | 2.90E-07 | 5  | 5  | 6.67E-07 | Whole_Blood                       | 0.477683 | Stomach                             | 2.75  | 0.25 | 0.25 | 0.71  | 4.97  | 3.56  | 1.74 | 5  |
| ENSG00000124635.7  | HIST1H2BJ     | 3.09E-07 | 2  | 2  | 5.16E-08 | Adipose_Subcutaneous              | 0.854031 | Cells_Transformed_fibroblasts       | 1.14  | 0.86 | 0.86 | -5.45 | 0.18  | -2.63 | 3.98 | 2  |
| ENSG00000163257.6  | DCAF16        | 3.18E-07 | 19 | 4  | 2.32E-08 | Esophagus_Muscularis              | 0.240582 | Brain_Hippocampus                   | 14.20 | 0.01 | 0.60 | -5.59 | -1.17 | -4.06 | 1.12 | 4  |

|                    |                    |          |    |    |          |                                     |          |                                       |       |      |       |       |       |       |      |    |
|--------------------|--------------------|----------|----|----|----------|-------------------------------------|----------|---------------------------------------|-------|------|-------|-------|-------|-------|------|----|
| ENSG00000271581.1  | XXbac-BPG248L24.12 | 3.26E-07 | 23 | 18 | 1.90E-08 | Colon_Sigmoid                       | 0.843517 | Nerve_Tibial                          | 6.18  | 0.01 | 0.22  | -3.88 | 5.62  | 1.34  | 2.29 | 18 |
| ENSG00000149115.9  | TNKS1BP1           | 3.48E-07 | 10 | 10 | 1.02E-07 | Adrenal_Gland                       | 0.736473 | Cells_Transformed_fibroblasts         | 3.35  | 0.19 | 0.19  | -3.86 | 5.32  | 1.04  | 2.63 | 10 |
| ENSG00000166741.3  | NNMT               | 3.51E-07 | 4  | 4  | 3.54E-07 | Adrenal_Gland                       | 0.809311 | Stomach                               | 1.31  | 0.65 | 0.65  | -0.24 | 5.09  | 2.07  | 2.38 | 4  |
| ENSG00000196090.8  | PTPRT              | 3.60E-07 | 2  | 2  | 5.30E-08 | Pancreas                            | 0.975885 | Small_Intestine_Terminal_Ileum        | 1.04  | 0.96 | 0.96  | -5.44 | -0.03 | -2.74 | 3.83 | 2  |
| ENSG00000130921.3  | C12orf65           | 3.74E-07 | 11 | 4  | 1.01E-09 | Adipose_Visceral_Omentum            | 0.602392 | Whole_Blood                           | 8.20  | 0.01 | 0.32  | 0.52  | 6.11  | 4.67  | 1.77 | 4  |
| ENSG00000075131.5  | TIPIN              | 4.03E-07 | 36 | 1  | 1.80E-08 | Stomach                             | 0.011229 | Cells_Transformed_fibroblasts         | 32.43 | 0.00 | 32.43 | 2.54  | 5.63  | 4.79  | 0.62 | 1  |
| ENSG00000131323.10 | TRAF3              | 4.27E-07 | 5  | 5  | 2.87E-09 | Brain_Cortex                        | 0.150955 | Esophagus_Gastroesophageal_Junction   | 2.14  | 0.26 | 0.26  | 1.44  | 5.94  | 3.45  | 1.63 | 5  |
| ENSG00000112343.8  | TRIM38             | 4.33E-07 | 11 | 7  | 2.56E-09 | Esophagus_Gastroesophageal_Junction | 0.105844 | Brain_Nucleus_accumbens_basal_ganglia | 5.88  | 0.03 | 0.24  | -4.92 | 5.96  | 2.83  | 2.90 | 7  |
| ENSG00000112812.11 | PRSS16             | 4.42E-07 | 15 | 6  | 1.04E-12 | Esophagus_Mucosa                    | 0.868919 | Ovary                                 | 9.52  | 0.01 | 0.48  | -7.13 | -0.17 | -4.44 | 1.95 | 6  |
| ENSG00000170703.11 | TTLL6              | 4.49E-07 | 22 | 8  | 1.50E-07 | Adipose_Visceral_Omentum            | 0.836054 | Brain_Cerebellar_Hemisphere           | 12.96 | 0.01 | 0.44  | -5.25 | 0.90  | -2.84 | 1.56 | 8  |
| ENSG00000020256.15 | ZFP64              | 4.51E-07 | 8  | 8  | 1.52E-05 | Cells_Transformed_fibroblasts       | 0.444318 | Brain_Nucleus_accumbens_basal_ganglia | 3.15  | 0.15 | 0.15  | -0.84 | 4.33  | 2.10  | 1.70 | 8  |
| ENSG00000187492.4  | CDHR4              | 4.52E-07 | 3  | 3  | 5.69E-05 | Testis                              | 0.000532 | Muscle_Skeletal                       | 1.61  | 0.40 | 0.40  | 3.46  | 4.03  | 3.84  | 0.32 | 3  |
| ENSG00000216915.2  | RP1-97D16.1        | 4.70E-07 | 2  | 2  | 9.97E-08 | Testis                              | 0.00044  | Brain_Nucleus_accu                    | 1.77  | 0.23 | 0.23  | 3.51  | 5.33  | 4.42  | 1.28 | 2  |

|                    |               |          |    |    |          |                       |          |                                       |       |      |      |       |       |       |      |    |
|--------------------|---------------|----------|----|----|----------|-----------------------|----------|---------------------------------------|-------|------|------|-------|-------|-------|------|----|
|                    |               |          |    |    |          |                       |          | mbens_basal_ganglia                   |       |      |      |       |       |       |      |    |
| ENSG00000187763.3  | OR2B7P        | 4.93E-07 | 3  | 2  | 8.81E-08 | Nerve_Tibial          | 4.51E-06 | Testis                                | 2.66  | 0.08 | 0.26 | -5.35 | -4.59 | -5.06 | 0.41 | 2  |
| ENSG00000249476.1  | CTD-2587M2.1  | 4.94E-07 | 32 | 2  | 0.00125  | Uterus                | 0.923005 | Stomach                               | 28.35 | 0.00 | 1.10 | -3.23 | 2.21  | -1.16 | 1.06 | 2  |
| ENSG00000197238.3  | HIST1H4J      | 5.06E-07 | 2  | 2  | 6.74E-07 | Breast_Mammary_Tissue | 1.08E-06 | Stomach                               | 1.67  | 0.33 | 0.33 | 4.88  | 4.97  | 4.92  | 0.07 | 2  |
| ENSG00000197177.11 | GPR123        | 5.19E-07 | 4  | 4  | 1.20E-05 | Brain_Cerebellum      | 0.462411 | Nerve_Tibial                          | 1.88  | 0.45 | 0.45 | 0.73  | 4.38  | 3.10  | 1.63 | 4  |
| ENSG00000169981.6  | ZNF35         | 5.29E-07 | 4  | 4  | 1.05E-08 | Breast_Mammary_Tissue | 0.414108 | Small_Intestine_Terminal_Ileum        | 1.33  | 0.64 | 0.64 | -5.72 | 0.82  | -2.16 | 2.70 | 4  |
| ENSG00000114302.11 | PRKAR2A       | 5.31E-07 | 3  | 3  | 5.82E-05 | Adipose_Subcutaneous  | 0.830766 | Breast_Mammary_Tissue                 | 1.81  | 0.30 | 0.30 | 0.21  | 4.02  | 2.73  | 2.18 | 3  |
| ENSG00000119682.12 | AREL1         | 5.35E-07 | 3  | 3  | 2.68E-07 | Testis                | 0.535359 | Brain_Nucleus_accumbens_basal_ganglia | 2.32  | 0.12 | 0.12 | -3.67 | 5.14  | 0.29  | 4.48 | 3  |
| ENSG00000220721.1  | OR1F12        | 5.56E-07 | 5  | 4  | 3.12E-07 | Nerve_Tibial          | 6.97E-05 | Thyroid                               | 3.64  | 0.12 | 0.22 | -5.12 | -3.98 | -4.71 | 0.45 | 4  |
| ENSG00000119630.9  | PGF           | 5.75E-07 | 4  | 4  | 2.13E-07 | Heart_Left_Ventricle  | 0.951511 | Liver                                 | 1.96  | 0.25 | 0.25 | -5.19 | 0.83  | -0.98 | 2.83 | 4  |
| ENSG00000250535.1  | STK19P        | 6.04E-07 | 32 | 19 | 5.32E-08 | Brain_Hippocampus     | 0.665615 | Whole_Blood                           | 9.54  | 0.01 | 0.37 | -1.40 | 5.44  | 2.27  | 1.79 | 19 |
| ENSG00000161996.13 | WDR90         | 6.07E-07 | 29 | 7  | 8.87E-06 | Spleen                | 0.805058 | Ovary                                 | 19.03 | 0.00 | 0.64 | -4.44 | 3.22  | -2.22 | 1.38 | 7  |
| ENSG00000204482.6  | LST1          | 6.50E-07 | 8  | 8  | 3.08E-06 | Esophagus_Muscularis  | 0.583233 | Muscle_Skeletal                       | 2.13  | 0.21 | 0.21 | -3.13 | 4.67  | 2.09  | 2.67 | 8  |
| ENSG00000124557.8  | BTN1A1        | 6.63E-07 | 2  | 2  | 0.000338 | Testis                | 0.000879 | Nerve_Tibial                          | 1.16  | 0.84 | 0.84 | -3.58 | 3.33  | -0.13 | 4.89 | 2  |
| ENSG00000119689.10 | DLST          | 6.72E-07 | 5  | 5  | 3.83E-06 | Muscle_Skeletal       | 0.759209 | Nerve_Tibial                          | 2.12  | 0.41 | 0.41 | -4.62 | 0.61  | -1.84 | 2.09 | 5  |
| ENSG00000254634.3  | RP11-231C14.3 | 7.79E-07 | 16 | 6  | 2.82E-05 | Muscle_Skeletal       | 0.456796 | Lung                                  | 10.50 | 0.01 | 0.54 | -4.19 | 2.46  | -2.42 | 1.60 | 6  |

|                    |          |          |    |   |          |                                       |          |                                      |       |      |      |       |       |       |      |   |
|--------------------|----------|----------|----|---|----------|---------------------------------------|----------|--------------------------------------|-------|------|------|-------|-------|-------|------|---|
| ENSG0000010704.14  | HFE      | 7.81E-07 | 12 | 7 | 4.37E-06 | Lung                                  | 0.581673 | Small_Intestine_Terminal_Ileum       | 7.61  | 0.03 | 0.27 | -0.55 | 4.59  | 2.37  | 1.42 | 7 |
| ENSG00000065621.10 | GSTO2    | 8.01E-07 | 26 | 7 | 5.91E-06 | Minor_Salivary_Gland                  | 0.964452 | Colon_Sigmoid                        | 17.82 | 0.00 | 0.70 | -2.96 | 4.53  | 1.48  | 2.06 | 7 |
| ENSG00000217539.2  | IQCB2P   | 8.41E-07 | 1  | 1 | 8.41E-07 | Testis                                | 8.41E-07 | Testis                               | 1.00  | 1.00 | 1.00 | -4.93 | -4.93 | -4.93 | NA   | 1 |
| ENSG00000204366.3  | ZBTB12   | 8.49E-07 | 1  | 1 | 8.49E-07 | Esophagus_Gastroesophageal_Junction   | 8.49E-07 | Esophagus_Gastroesophageal_Junction  | 1.00  | 1.00 | 1.00 | 4.92  | 4.92  | 4.92  | NA   | 1 |
| ENSG00000177352.9  | CCDC71   | 8.67E-07 | 11 | 4 | 2.43E-07 | Brain_Hippocampus                     | 0.991314 | Cells_EBV-transformed_lymphocytes    | 7.86  | 0.01 | 0.44 | -0.01 | 5.16  | 2.80  | 1.74 | 4 |
| ENSG00000204421.2  | LY6G6C   | 8.67E-07 | 3  | 3 | 4.72E-07 | Brain_Nucleus_accumbens_basal_ganglia | 0.690044 | Esophagus_Mucosa                     | 1.69  | 0.50 | 0.50 | -5.04 | 1.26  | -1.39 | 3.27 | 3 |
| ENSG00000159199.9  | ATP5G1   | 8.78E-07 | 13 | 3 | 1.03E-08 | Stomach                               | 0.00883  | Brain_Cerebellum                     | 10.22 | 0.01 | 0.51 | 2.62  | 5.73  | 4.43  | 0.95 | 3 |
| ENSG00000237541.3  | HLA-DQA2 | 8.99E-07 | 39 | 9 | 2.84E-06 | Heart_Left_Ventricle                  | 0.699871 | Brain_Cerebellum                     | 20.58 | 0.00 | 0.78 | -1.61 | 4.68  | 2.99  | 1.41 | 9 |
| ENSG00000196275.9  | GTF2IRD2 | 9.23E-07 | 23 | 7 | 2.71E-08 | Brain_Cortex                          | 0.479192 | Brain_Anterior_cingulate_cortex_BA24 | 14.35 | 0.00 | 0.48 | 0.71  | 5.56  | 4.17  | 1.32 | 7 |
| ENSG00000158417.6  | EIF5B    | 1.02E-06 | 3  | 3 | 3.94E-05 | Adrenal_Gland                         | 0.00125  | Brain_Hippocampus                    | 1.39  | 0.63 | 0.63 | -4.11 | 3.23  | -1.51 | 4.11 | 3 |
| ENSG00000164855.11 | TMEM184A | 1.05E-06 | 19 | 7 | 1.21E-06 | Muscle_Skeletal                       | 0.978492 | Adipose_Subcutaneous                 | 11.46 | 0.00 | 0.44 | -3.69 | 4.85  | 0.19  | 1.75 | 7 |
| ENSG00000176422.10 | SPRYD4   | 1.09E-06 | 12 | 7 | 6.15E-09 | Thyroid                               | 0.873777 | Adrenal_Gland                        | 6.81  | 0.00 | 0.47 | -5.81 | 1.23  | -1.59 | 1.65 | 7 |

|                    |              |          |    |   |          |                                     |          |                                |       |      |      |       |       |       |      |   |
|--------------------|--------------|----------|----|---|----------|-------------------------------------|----------|--------------------------------|-------|------|------|-------|-------|-------|------|---|
| ENSG00000160828.13 | STAG3L2      | 1.15E-06 | 40 | 2 | 1.56E-08 | Breast_Mammary_Tissue               | 0.129504 | Small_Intestine_Terminal_Ileum | 31.97 | 0.00 | 1.14 | -5.65 | -1.52 | -4.57 | 0.84 | 2 |
| ENSG00000141458.8  | NPC1         | 1.17E-06 | 26 | 2 | 1.56E-07 | Esophagus_Muscularis                | 0.006132 | Small_Intestine_Terminal_Ileum | 20.71 | 0.00 | 1.38 | -5.25 | -2.74 | -4.37 | 0.61 | 2 |
| ENSG00000204438.6  | GPANK1       | 1.26E-06 | 9  | 8 | 7.91E-07 | Esophagus_Gastroesophageal_Junction | 0.471296 | Adipose_Visceral_Omentum       | 3.12  | 0.02 | 0.19 | -0.72 | 4.94  | 1.95  | 1.65 | 8 |
| ENSG00000254562.1  | RP11-64I17.1 | 1.31E-06 | 1  | 1 | 1.31E-06 | Testis                              | 1.31E-06 | Testis                         | 1.00  | 1.00 | 1.00 | -4.84 | -4.84 | NA    | 1    |   |
| ENSG00000172409.5  | CLP1         | 1.32E-06 | 6  | 6 | 6.51E-07 | Whole_Blood                         | 0.61533  | Testis                         | 1.83  | 0.27 | 0.27 | -3.14 | 4.98  | 1.04  | 2.90 | 6 |
| ENSG00000182196.9  | ARL6IP4      | 1.35E-06 | 10 | 3 | 9.63E-08 | Adipose_Visceral_Omentum            | 0.000568 | Stomach                        | 8.61  | 0.01 | 0.31 | 3.45  | 5.33  | 4.63  | 0.54 | 3 |
| ENSG00000187664.8  | HAPLN4       | 1.36E-06 | 16 | 5 | 5.71E-07 | Lung                                | 0.976319 | Nerve_Tibial                   | 11.98 | 0.01 | 0.42 | -5.00 | 1.21  | -0.61 | 1.75 | 5 |

**ST8(a). MTAG GERD metaXcan analysis using eQTL information from the Gastro-esophageal junction tissue**

| gene               | Gene name  | Z     | Effect size | Pval     | var_g | pred_perf_r2 | pred_perf_pval | pred_perf_qual | n_snps_unsed | n_snps_in_cov | n_snps_in_model |
|--------------------|------------|-------|-------------|----------|-------|--------------|----------------|----------------|--------------|---------------|-----------------|
| ENSG00000186470.9  | BTN3A2     | 5.55  | 0.10        | 2.93E-08 | 0.29  | 0.50         | 1.06E-31       | NA             | 28           | 31            | 31              |
| ENSG00000268885.1  | AC026740.1 | -5.14 | -0.41       | 2.73E-07 | 0.02  | 0.03         | 0.014816       | NA             | 7            | 7             | 7               |
| ENSG00000254527.1  | ENPP7P12   | 4.85  | 0.34        | 1.21E-06 | 0.02  | 0.11         | 6.73E-06       | NA             | 9            | 12            | 12              |
| ENSG00000118961.10 | C2orf43    | -4.79 | -0.13       | 1.63E-06 | 0.17  | 0.35         | 5.61E-19       | NA             | 9            | 9             | 9               |
| ENSG00000224843.2  | LINC00240  | -4.55 | -0.30       | 5.37E-06 | 0.03  | 0.04         | 0.008003       | NA             | 6            | 8             | 8               |
| ENSG00000125965.4  | GDF5       | -4.54 | -0.25       | 5.50E-06 | 0.04  | 0.12         | 1.95E-06       | NA             | 19           | 26            | 26              |
| ENSG00000163320.6  | CGGBP1     | 4.44  | 0.33        | 8.98E-06 | 0.02  | 0.44         | 1.18E-26       | NA             | 37           | 42            | 42              |
| ENSG00000112877.6  | CEP72      | -4.36 | -0.17       | 1.33E-05 | 0.08  | 0.16         | 1.77E-08       | NA             | 25           | 27            | 27              |
| ENSG00000139531.8  | SUOX       | 4.32  | 0.34        | 1.55E-05 | 0.02  | 0.16         | 1.57E-08       | NA             | 9            | 18            | 18              |
| ENSG00000084674.9  | APOB       | 4.28  | 0.31        | 1.84E-05 | 0.02  | 0.03         | 0.015102       | NA             | 9            | 10            | 10              |
| ENSG00000065060.12 | UHRF1BP1   | 4.26  | 0.08        | 2.00E-05 | 0.28  | 0.48         | 5.96E-30       | NA             | 65           | 75            | 75              |
| ENSG00000004534.10 | RBM6       | -4.21 | -0.11       | 2.60E-05 | 0.16  | 0.33         | 8.24E-19       | NA             | 43           | 65            | 65              |

**ST8(b). MTAG GERD metaXcan analysis using eQTL information from the Esophageal Muscularis tissue**

| gene                   | Gene name     | Z     | Effect size | Pval     | var_g | pred_perf_r2 | pred_perf_pval | pred_perf_qval | n_snps_unsed | n_snps_in_cov | n_snps_in_model |
|------------------------|---------------|-------|-------------|----------|-------|--------------|----------------|----------------|--------------|---------------|-----------------|
| ENSG0000020381<br>3.4  | HIST1H3H      | 6.49  | 0.60        | 8.31E-11 | 0.010 | 0.016        | 0.036367       | NA             | 39           | 58            | 58              |
| ENSG0000011896<br>1.10 | C2orf43       | -6.03 | -0.12       | 1.62E-09 | 0.274 | 0.366        | 1.98E-31       | NA             | 19           | 28            | 28              |
| ENSG0000018647<br>0.9  | BTN3A2        | 5.68  | 0.09        | 1.38E-08 | 0.359 | 0.580        | 2.19E-61       | NA             | 32           | 36            | 36              |
| ENSG0000007437<br>0.13 | ATP2A3        | 5.31  | 0.50        | 1.12E-07 | 0.014 | 0.054        | 8.61E-05       | NA             | 7            | 7             | 7               |
| ENSG0000011281<br>2.11 | PRSS16        | -5.17 | -0.15       | 2.40E-07 | 0.136 | 0.093        | 1.26E-07       | NA             | 58           | 76            | 76              |
| ENSG0000026838<br>8.1  | FENDRR        | 5.15  | 0.41        | 2.63E-07 | 0.017 | 0.036        | 0.001188       | NA             | 12           | 13            | 13              |
| ENSG0000010566<br>2.11 | CRTC1         | -5.10 | -0.62       | 3.38E-07 | 0.009 | 0.035        | 0.001527       | NA             | 7            | 12            | 12              |
| ENSG0000027015<br>4.1  | RP11-419I17.1 | 5.02  | 0.39        | 5.27E-07 | 0.018 | 0.062        | 2.38E-05       | NA             | 5            | 5             | 5               |
| ENSG0000018913<br>4.3  | NKAPL         | 4.97  | 0.62        | 6.61E-07 | 0.006 | 0.034        | 0.002042       | NA             | 5            | 6             | 6               |
| ENSG0000011287<br>7.6  | CEP72         | -4.82 | -0.19       | 1.46E-06 | 0.066 | 0.108        | 4.97E-09       | NA             | 13           | 15            | 15              |
| ENSG0000012456<br>2.5  | SNRPC         | -4.71 | -0.17       | 2.42E-06 | 0.081 | 0.145        | 2.20E-11       | NA             | 14           | 14            | 14              |
| ENSG0000017105<br>5.10 | FEZ2          | 4.64  | 0.33        | 3.49E-06 | 0.024 | 0.074        | 2.82E-06       | NA             | 6            | 6             | 6               |
| ENSG0000017461<br>1.7  | KY            | -4.62 | -0.28       | 3.85E-06 | 0.031 | 0.027        | 0.00537        | NA             | 24           | 27            | 27              |
| ENSG0000023973<br>2.2  | TLR9          | 4.54  | 0.41        | 5.54E-06 | 0.014 | 0.033        | 0.002018       | NA             | 12           | 12            | 12              |

**ST8(c). MTAG BE metaXcan analysis using eQTL information from the Esophageal Mucosa tissue**

| gene               | Gene name    | Z     | Effect size | Pval     | var_g | pred_perf_r2 | pred_perf_pval | pred_perf_qval | n_snps_used | n_snps_in_cov | n_snps_in_model |
|--------------------|--------------|-------|-------------|----------|-------|--------------|----------------|----------------|-------------|---------------|-----------------|
| ENSG00000186470.9  | BTN3A2       | 6.16  | 0.09        | 7.15E-10 | 0.39  | 0.60         | 1.25E-71       | NA             | 53          | 61            | 61              |
| ENSG00000112812.11 | PRSS16       | -6.00 | -0.83       | 1.93E-09 | 0.01  | 0.02         | 0.019411       | NA             | 9           | 10            | 10              |
| ENSG00000204789.3  | ZNF204P      | -5.90 | -0.64       | 3.53E-09 | 0.01  | 0.02         | 0.0071         | NA             | 10          | 13            | 13              |
| ENSG00000197062.7  | RP5-874C20.3 | 5.55  | 0.57        | 2.93E-08 | 0.01  | 0.13         | 7.28E-11       | NA             | 12          | 42            | 42              |
| ENSG00000226314.3  | ZNF192P1     | 5.33  | 0.67        | 9.68E-08 | 0.01  | 0.05         | 0.000105       | NA             | 23          | 52            | 52              |
| ENSG00000101019.17 | UQCC1        | 5.03  | 0.24        | 4.98E-07 | 0.05  | 0.16         | 7.13E-14       | NA             | 8           | 11            | 11              |
| ENSG00000118961.10 | C2orf43      | -4.82 | -0.10       | 1.44E-06 | 0.29  | 0.40         | 1.47E-38       | NA             | 40          | 43            | 43              |
| ENSG00000197279.3  | ZNF165       | -4.64 | -0.30       | 3.56E-06 | 0.02  | 0.07         | 2.13E-06       | NA             | 11          | 17            | 17              |
| ENSG00000154319.10 | FAM167A      | 4.63  | 0.16        | 3.63E-06 | 0.09  | 0.08         | 5.91E-07       | NA             | 40          | 46            | 46              |
| ENSG00000173295.3  | FAM86B3P     | 4.51  | 0.11        | 6.36E-06 | 0.20  | 0.46         | 6.42E-46       | NA             | 28          | 31            | 31              |
| ENSG00000188242.4  | CTD-2228K2.5 | 4.48  | 0.25        | 7.36E-06 | 0.04  | 0.07         | 4.32E-06       | NA             | 18          | 29            | 29              |
| ENSG00000004534.10 | RBM6         | -4.44 | -0.09       | 9.09E-06 | 0.29  | 0.51         | 1.05E-54       | NA             | 21          | 34            | 34              |
| ENSG00000242607.1  | RPS3AP34     | 4.41  | 0.47        | 1.04E-05 | 0.01  | 0.04         | 0.000463       | NA             | 4           | 7             | 7               |

**ST9. MultiXcan top associated genes with BE susceptibility**

| Gene ID            | Gene name        | Pval     | n  | n_i<br>nde<br>p | p_i<br>be<br>st | t_i<br>best                 | p_i<br>wor<br>st | t_i<br>worst                    | eigen_<br>max | eigen_<br>min | eigen_<br>min<br>_kept | z_mi<br>n | z_ma<br>x | z_<br>me<br>an | z_<br>sd | t<br>m<br>i | stat<br>us |
|--------------------|------------------|----------|----|-----------------|-----------------|-----------------------------|------------------|---------------------------------|---------------|---------------|------------------------|-----------|-----------|----------------|----------|-------------|------------|
| ENSG00000137185.7  | ZSCAN9           | 1.87E-11 | 19 | 13              | 4.02E-11        | Thyroid                     | 7.39E-01         | Skin_Not_Sun_Exposed_Suprapubic | 6.14          | 0.03          | 0.21                   | -6.60     | 1.58      | -2.57          | 2.44     | 13          | 0          |
| ENSG00000197062.7  | RP5-874C20.3     | 2.38E-10 | 40 | 7               | 1.17E-08        | Brain_Putamen_basal_ganglia | 8.91E-01         | Brain_Cortex                    | 25.18         | 0.00          | 0.98                   | 0.14      | 5.70      | 3.60           | 1.43     | 7           | 0          |
| ENSG00000196735.7  | HLA-DQA1         | 3.38E-10 | 29 | 28              | 0.003269        | Liver                       | 8.90E-01         | Prostate                        | 2.72          | 0.12          | 0.12                   | -2.89     | 2.94      | -0.26          | 1.63     | 28          | 0          |
| ENSG00000203813.4  | HIST1H3H         | 4.34E-10 | 2  | 2               | 8.31E-11        | Esophagus_Muscularis        | 8.02E-01         | Stomach                         | 1.18          | 0.82          | 0.82                   | 0.25      | 6.49      | 3.37           | 4.42     | 2           | 0          |
| ENSG00000225595.2  | XXbac-BPG308K3.6 | 4.48E-10 | 1  | 1               | 4.48E-10        | Testis                      | 4.48E-10         | Testis                          | 1.00          | 1.00          | 1.00                   | -6.24     | -6.24     | -6.24          | NA       | 1           | 0          |
| ENSG00000260396.1  | AC012065.7       | 4.69E-10 | 15 | 11              | 4.65E-12        | Adipose_Subcutaneous        | 9.04E-01         | Spleen                          | 5.65          | 0.07          | 0.24                   | -6.92     | 0.80      | -2.55          | 2.23     | 11          | 0          |
| ENSG00000096654.11 | ZNF184           | 7.95E-10 | 5  | 5               | 2.83E-12        | Brain_Hypothalamus          | 8.52E-01         | Small_Intestine_Terminal_Ileum  | 1.86          | 0.37          | 0.37                   | -6.99     | 1.36      | -1.52          | 3.23     | 5           | 0          |
| ENSG00000129933.16 | MAU2             | 3.01E-09 | 11 | 9               | 1.64E-05        | Spleen                      | 9.01E-01         | Colon_Sigmoid                   | 4.51          | 0.07          | 0.23                   | -3.63     | 4.31      | -1.08          | 2.11     | 9           | 0          |
| ENSG00000228666.1  | KRT18P1          | 3.80E-09 | 1  | 1               | 3.80E-09        | Testis                      | 3.80E-09         | Testis                          | 1.00          | 1.00          | 1.00                   | 5.89      | 5.89      | 5.89           | NA       | 1           | 0          |
| ENSG00000186470.9  | BTN3A2           | 6.05E-09 | 48 | 1               | 6.75E-10        | Brain_Hippocampus           | 4.19E-05         | Brain_Caudate_basal_ganglia     | 43.45         | 0.00          | 43.45                  | 4.10      | 6.17      | 5.53           | 0.41     | 1           | 0          |
| ENSG00000271755.1  | RP1-153G14.4     | 6.15E-09 | 13 | 9               | 2.78E-08        | Muscle_Skeletal             | 9.67E-01         | Brain_Anterior_cing             | 6.45          | 0.03          | 0.26                   | -1.02     | 5.55      | 0.80           | 1.99     | 9           | 0          |

|                    |           |          |    |    |          |                                       |          |                                 |       |      |      |       |       |       |      |    |   |
|--------------------|-----------|----------|----|----|----------|---------------------------------------|----------|---------------------------------|-------|------|------|-------|-------|-------|------|----|---|
|                    |           |          |    |    |          |                                       |          | ulate_cortex_BA24               |       |      |      |       |       |       |      |    |   |
| ENSG00000230598.1  | OR2H4P    | 7.32E-09 | 1  | 1  | 7.32E-09 | Testis                                | 7.32E-09 | Testis                          | 1.00  | 1.00 | 1.00 | -5.78 | -5.78 | -5.78 | N A  | 1  | 0 |
| ENSG00000229391.3  | HLA-DRB6  | 1.22E-08 | 43 | 33 | 0.000597 | Brain_Nucleus_accumbens_basal_ganglia | 9.77E-01 | Heart_Atrial_Appendage          | 4.99  | 0.07 | 0.17 | -3.43 | 3.21  | 0.49  | 1.60 | 33 | 0 |
| ENSG00000197903.6  | HIST1H2BK | 1.35E-08 | 7  | 7  | 1.81E-11 | Adipose_Visceral_Omentum              | 3.20E-01 | Pancreas                        | 2.99  | 0.20 | 0.20 | -6.72 | 2.45  | -2.58 | 3.51 | 7  | 0 |
| ENSG00000105662.11 | CRTC1     | 1.95E-08 | 7  | 7  | 3.38E-07 | Esophagus_Muscularis                  | 4.49E-01 | Esophagus_Mucosa                | 2.12  | 0.37 | 0.37 | -5.10 | 4.81  | 0.08  | 3.72 | 7  | 0 |
| ENSG00000105649.5  | RAB3A     | 2.34E-08 | 7  | 6  | 9.34E-08 | Colon_Sigmoid                         | 6.57E-01 | Artery_Tibial                   | 3.36  | 0.07 | 0.16 | -5.34 | 3.53  | -0.36 | 2.91 | 6  | 0 |
| ENSG00000124508.12 | BTN2A2    | 2.76E-08 | 37 | 8  | 1.26E-09 | Pancreas                              | 8.80E-01 | Heart_Left_Ventricle            | 19.88 | 0.00 | 0.73 | -3.72 | 6.07  | 2.55  | 1.60 | 8  | 0 |
| ENSG00000197153.3  | HIST1H3J  | 3.00E-08 | 2  | 2  | 6.98E-09 | Testis                                | 4.24E-01 | Skin_Not_Sun_Exposed_Suprapubic | 1.04  | 0.96 | 0.96 | -5.79 | -0.80 | -3.30 | 3.53 | 2  | 0 |
| ENSG00000158691.10 | ZSCAN12   | 5.09E-08 | 9  | 5  | 5.32E-07 | Skin_Sun_Exposed_Lower_Leg            | 7.78E-01 | Nerve_Tibial                    | 5.15  | 0.02 | 0.31 | -1.35 | 5.01  | 1.93  | 1.93 | 5  | 0 |
| ENSG00000219891.2  | ZSCAN12P1 | 5.23E-08 | 15 | 8  | 1.35E-06 | Skin_Sun_Exposed_Lower_Leg            | 9.06E-01 | Nerve_Tibial                    | 8.12  | 0.02 | 0.29 | -4.83 | 4.05  | -0.26 | 2.43 | 8  | 0 |
| ENSG00000204789.3  | ZNF204P   | 5.56E-08 | 25 | 11 | 3.53E-09 | Esophagus_Mucosa                      | 9.56E-01 | Brain_Caudate_basal_ganglia     | 9.28  | 0.01 | 0.40 | -5.90 | 1.46  | -2.18 | 2.07 | 11 | 0 |
| ENSG00000146477.4  | SLC22A3   | 5.89E-08 | 24 | 8  | 6.18E-08 | Liver                                 | 7.62E-01 | Pancreas                        | 13.82 | 0.00 | 0.49 | -5.41 | 5.25  | 1.99  | 2.64 | 8  | 0 |

|                    |               |          |    |    |          |                                       |          |                                      |       |      |      |       |       |       |      |    |   |
|--------------------|---------------|----------|----|----|----------|---------------------------------------|----------|--------------------------------------|-------|------|------|-------|-------|-------|------|----|---|
| ENSG00000167487.7  | KLHL26        | 6.54E-08 | 9  | 8  | 9.76E-09 | Brain_Cerebellar_Hemisphere           | 8.41E-01 | Muscle_Skeletal                      | 2.81  | 0.09 | 0.31 | -0.20 | 5.73  | 2.42  | 2.03 | 8  | 0 |
| ENSG00000115380.14 | EFEMP1        | 8.58E-08 | 11 | 9  | 1.33E-07 | Skin_Not_Sun_Exposed_Suprapubic       | 8.07E-01 | Artery_Coronary                      | 4.04  | 0.03 | 0.28 | -5.27 | 3.65  | -1.58 | 2.36 | 9  | 0 |
| ENSG00000204709.4  | C6orf100      | 9.48E-08 | 12 | 10 | 7.90E-10 | Adipose_Visceral_Omentum              | 8.95E-01 | Lung                                 | 3.03  | 0.08 | 0.22 | -6.15 | 2.76  | -0.46 | 2.65 | 10 | 0 |
| ENSG00000130517.9  | PGPEP1        | 1.27E-07 | 32 | 7  | 2.84E-07 | Cells_Transformed_fibroblasts         | 8.37E-01 | Ovary                                | 21.55 | 0.00 | 0.73 | -2.29 | 5.13  | 2.97  | 1.79 | 7  | 0 |
| ENSG00000271035.1  | CTD-2269E23.3 | 1.62E-07 | 1  | 1  | 1.62E-07 | Testis                                | 1.62E-07 | Testis                               | 1.00  | 1.00 | 1.00 | -5.24 | -5.24 | -5.24 | NA   | 1  | 0 |
| ENSG00000170983.3  | LINC00208     | 1.83E-07 | 1  | 1  | 1.83E-07 | Testis                                | 1.83E-07 | Testis                               | 1.00  | 1.00 | 1.00 | -5.22 | -5.22 | -5.22 | NA   | 1  | 0 |
| ENSG00000136944.13 | LMX1B         | 2.16E-07 | 4  | 4  | 3.40E-09 | Adipose_Subcutaneous                  | 7.66E-01 | Colon_Transverse                     | 1.73  | 0.26 | 0.26 | -5.91 | 0.30  | -2.47 | 2.77 | 4  | 0 |
| ENSG00000026950.12 | BTN3A1        | 2.27E-07 | 33 | 3  | 0.00061  | Cells_EBV-transformed_lymphocytes     | 9.54E-01 | Lung                                 | 26.52 | 0.00 | 1.06 | -3.26 | 3.43  | 1.36  | 1.48 | 3  | 0 |
| ENSG00000162685.5  | LSP1P3        | 2.36E-07 | 8  | 1  | 1.16E-07 | Testis                                | 1.77E-06 | Brain_Anterior_cingulate_cortex_BA24 | 7.80  | 0.00 | 7.80 | -5.25 | 5.30  | -3.78 | 3.67 | 1  | 0 |
| ENSG00000224843.2  | LINC00240     | 2.47E-07 | 20 | 9  | 6.32E-09 | Heart_Atrial_Appendage                | 1.82E-01 | Liver                                | 9.96  | 0.02 | 0.42 | -5.81 | -1.34 | -3.58 | 1.31 | 9  | 0 |
| ENSG00000171368.10 | TPPP          | 2.57E-07 | 17 | 10 | 4.65E-09 | Brain_Nucleus_accumbens_basal_ganglia | 7.74E-01 | Thyroid                              | 8.75  | 0.02 | 0.31 | -5.24 | 5.86  | 2.48  | 2.92 | 10 | 0 |
| ENSG00000105701.11 | FKBP8         | 3.25E-07 | 2  | 2  | 1.24E-06 | Heart_Left_Ventricle                  | 1.22E-02 | Spleen                               | 1.00  | 1.00 | 1.00 | -4.85 | -2.51 | -3.68 | 1.66 | 2  | 0 |

|                    |            |          |    |    |          |                                       |          |                                 |       |      |       |       |       |       |      |    |   |
|--------------------|------------|----------|----|----|----------|---------------------------------------|----------|---------------------------------|-------|------|-------|-------|-------|-------|------|----|---|
| ENSG00000118961.10 | C2orf43    | 4.52E-07 | 44 | 1  | 3.52E-10 | Vagina                                | 2.97E-03 | Spleen                          | 39.76 | 0.00 | 39.76 | -6.27 | -2.97 | -4.78 | 0.76 | 1  | 0 |
| ENSG00000227799.1  | AC012358.4 | 5.88E-07 | 4  | 4  | 3.32E-08 | Spleen                                | 9.08E-01 | Esophagus_Muscularis            | 1.33  | 0.72 | 0.72  | -0.12 | 5.52  | 2.44  | 2.36 | 4  | 0 |
| ENSG00000197279.3  | ZNF165     | 5.90E-07 | 18 | 8  | 6.22E-07 | Heart_Left_Ventricle                  | 8.76E-01 | Pituitary                       | 8.79  | 0.03 | 0.38  | -4.64 | 4.98  | 1.94  | 2.34 | 8  | 0 |
| ENSG00000204421.2  | LY6G6C     | 5.97E-07 | 3  | 3  | 0.000251 | Brain_Nucleus_accumbens_basal_ganglia | 4.80E-01 | Uterus                          | 1.69  | 0.50 | 0.50  | -3.66 | 1.71  | -0.88 | 2.69 | 3  | 0 |
| ENSG00000130520.6  | LSM4       | 6.69E-07 | 7  | 7  | 0.000138 | Nerve_Tibial                          | 6.50E-01 | Esophagus_Muscularis            | 3.35  | 0.19 | 0.19  | -2.72 | 3.81  | 0.72  | 2.51 | 7  | 0 |
| ENSG00000100417.7  | PMM1       | 6.98E-07 | 17 | 6  | 0.001017 | Brain_Cerebellum                      | 9.13E-01 | Skin_Not_Sun_Exposed_Suprapubic | 11.76 | 0.00 | 0.42  | -2.12 | 3.29  | 0.07  | 1.65 | 6  | 0 |
| ENSG00000136842.9  | TMOD1      | 7.15E-07 | 5  | 4  | 1.53E-08 | Ovary                                 | 7.74E-01 | Uterus                          | 2.10  | 0.06 | 0.83  | -0.40 | 5.66  | 1.52  | 2.40 | 4  | 0 |
| ENSG00000143869.5  | GDF7       | 8.81E-07 | 8  | 7  | 0.00018  | Artery_Tibial                         | 6.39E-01 | Skin_Sun_Exposed_Lower_leg      | 3.06  | 0.09 | 0.22  | -3.75 | 1.07  | -1.10 | 1.73 | 7  | 0 |
| ENSG00000235109.3  | ZSCAN31    | 9.21E-07 | 37 | 7  | 4.48E-06 | Brain_Spinal_cord_cervical_c-1        | 8.48E-01 | Brain_Cerebellar_Hemispheres    | 22.18 | 0.00 | 0.86  | -4.59 | 2.29  | -1.60 | 1.55 | 7  | 0 |
| ENSG00000213071.6  | LPAL2      | 1.22E-06 | 2  | 2  | 2.56E-06 | Testis                                | 2.69E-04 | Cells_Transformed_fibroblasts   | 1.32  | 0.68 | 0.68  | -3.64 | 4.70  | 0.53  | 5.90 | 2  | 0 |
| ENSG00000204713.6  | TRIM27     | 1.26E-06 | 15 | 11 | 1.37E-09 | Spleen                                | 8.33E-01 | Testis                          | 4.34  | 0.00 | 0.25  | -0.21 | 6.06  | 2.52  | 2.02 | 11 | 0 |
| ENSG00000171056.6  | SOX7       | 1.26E-06 | 7  | 7  | 1.97E-06 | Adipose_Subcutaneous                  | 3.54E-01 | Adipose_Visceral_Omentum        | 2.32  | 0.37 | 0.37  | -1.62 | 4.76  | 2.12  | 2.78 | 7  | 0 |

|                    |               |          |    |   |          |                 |          |                      |       |      |      |       |       |       |      |   |   |
|--------------------|---------------|----------|----|---|----------|-----------------|----------|----------------------|-------|------|------|-------|-------|-------|------|---|---|
| ENSG00000112812.11 | PRSS16        | 1.32E-06 | 19 | 7 | 4.74E-10 | Muscle_Skeletal | 7.81E-01 | Ovary                | 12.21 | 0.00 | 0.51 | -6.23 | -0.28 | -4.63 | 1.63 | 7 | 0 |
| ENSG00000237154.1  | MCFD2P1       | 1.35E-06 | 5  | 5 | 2.99E-06 | Testis          | 6.42E-01 | Muscle_Skeletal      | 1.86  | 0.26 | 0.26 | -4.67 | 3.37  | 0.66  | 3.19 | 5 | 0 |
| ENSG00000268885.1  | AC026740.1    | 1.37E-06 | 21 | 4 | 1.63E-08 | Vagina          | 7.10E-01 | Artery_Aorta         | 14.66 | 0.01 | 0.56 | -5.65 | 0.96  | -3.51 | 1.58 | 4 | 0 |
| ENSG00000261584.1  | RP11-457M11.5 | 1.58E-06 | 48 | 2 | 0.008364 | Ovary           | 9.90E-01 | Esophagus_Muscularis | 40.40 | 0.00 | 1.42 | -2.64 | 2.38  | 0.34  | 1.07 | 2 | 0 |

**ST10. Selected candidate genome-wide GERD loci stratified into obesity-driven and depression-driven GERD genetic subgroups.**

| Subgroup               | SNP        | CHR | BP        | Genes<br>(based on<br>eQTL and<br>proximity) | EA | NEA | MTAG<br>GERD<br>beta | Z   | MTAG<br>Pvalue | 23andMe<br>Pvalue | PheWAS findings (best<br>3)                                                                                |
|------------------------|------------|-----|-----------|----------------------------------------------|----|-----|----------------------|-----|----------------|-------------------|------------------------------------------------------------------------------------------------------------|
| obesity-driven<br>GERD | rs1510719  | 4   | 140938116 | MAML3                                        | T  | C   | 0.039                | 7.9 | 3.84E-15       | 6.89E-05          | Leg fat percentage, Body fat percentage, Maternal smoking around birth, Number of self-reported operations |
| obesity-driven<br>GERD | rs13107325 | 4   | 103188709 | SLC39A8                                      | C  | T   | -0.07                | 7.6 | 2.20E-14       | 6.45E-17          | BMI, Haemoglobin concentration, Cognitive performance                                                      |
| obesity-driven<br>GERD | rs9372625  | 6   | 98344031  |                                              | G  | A   | 0.038                | 7.6 | 2.62E-14       | 2.33E-08          | University qualifications, intelligence, Leg fat percentage, time spent outdoors in summer                 |
| obesity-driven<br>GERD | rs773109   | 12  | 56374695  | CDK2, SUOX,<br>ERBB3, RAB5B                  | G  | A   | 0.038                | 7.5 | 8.71E-14       | 1.10E-04          | Eosinophil percentage, Allergic disease (asthma, hayfever or eczema)                                       |
| obesity-driven<br>GERD | rs9940128  | 16  | 53800754  | FTO                                          | G  | A   | -0.033               | 6.8 | 8.06E-12       | 2.06E-05          | Whole body water mass, Body fat percentage, BMI                                                            |
| obesity-driven<br>GERD | rs3863241  | 8   | 73890335  | TERF1                                        | C  | T   | -0.032               | 6.7 | 1.49E-11       | 1.68E-04          | Sleep duration, Neuroticism, Frequency of tiredness in last 2 weeks, Fractures                             |
| obesity-driven<br>GERD | rs2396766  | 7   | 114318071 | FOXP2                                        | G  | A   | -0.032               | 6.7 | 2.33E-11       | 1.70E-04          | BMI, High blood pressure, Sleep duration, Hypertension                                                     |
| obesity-driven<br>GERD | rs215614   | 7   | 32347335  | PDE1C                                        | G  | A   | 0.033                | 6.6 | 4.08E-11       | 2.17E-06          | Leg fat percentage, BMI, Intelligence, waist circumference                                                 |
| obesity-driven<br>GERD | rs1937450  | 1   | 66478840  | PDE4B                                        | T  | G   | -0.032               | 6.5 | 7.07E-11       | 8.71E-05          | Whole body fat mass, Waist circumference, BMI, Body fat percentage                                         |
| obesity-driven<br>GERD | rs1596747  | 2   | 193802478 |                                              | A  | G   | -0.031               | 6.5 | 1.00E-10       | 1.71E-08          | Leg fat percentage, university qualifications, BMI                                                         |
| obesity-driven<br>GERD | rs2815749  | 1   | 72814783  | NEGR1                                        | A  | G   | -0.039               | 6.5 | 1.07E-10       | 7.40E-12          | Leg fat percentage, BMI, Whole body fat mass,                                                              |

|                        |            |    |           |                                       |   |   |        |     |          |          |                                                                                                     |
|------------------------|------------|----|-----------|---------------------------------------|---|---|--------|-----|----------|----------|-----------------------------------------------------------------------------------------------------|
| obesity-driven GERD    | rs2106353  | 7  | 126506598 | GRM8                                  | G | T | -0.037 | 6.4 | 1.37E-10 | 1.33E-06 | Sensitivity/hurt feelings, Neuroticism, University qualifications                                   |
| obesity-driven GERD    | rs205262   | 6  | 34563164  | UHRF1BP1                              | A | G | -0.035 | 6.4 | 1.38E-10 | 1.36E-09 | BMI, whole body fat mass, basal metabolic rate                                                      |
| obesity-driven GERD    | rs9636202  | 19 | 18449238  | PGPEP1                                | G | A | 0.035  | 6.4 | 1.51E-10 | 1.04E-14 | Arm fat percentage, BMI, Coronary artery disease                                                    |
| obesity-driven GERD    | rs761777   | 10 | 134938075 | KNDC1                                 | A | G | -0.035 | 6.2 | 4.71E-10 | 4.01E-09 | University qualifications, body fat percentage                                                      |
|                        |            |    |           |                                       |   |   |        |     |          |          |                                                                                                     |
| depression-driven GERD | rs2145318  | 6  | 26496603  | HMGN4, BTN2A1, BTN2A2, BTN1A1, BTN3A3 | T | A | -0.035 | 7.3 | 2.03E-13 | 3.31E-08 | Mean corpuscular hemoglobin concentration, disorders of mineral metabolism                          |
| depression-driven GERD | rs12967855 | 18 | 35138245  | CELF4                                 | A | G | 0.037  | 7.1 | 1.09E-12 | 1.36E-13 | University qualifications, Neuroticism score, Fed-up feelings, Forced expiratory volume in 1-second |
| depression-driven GERD | rs1431196  | 18 | 50832102  | DCC                                   | A | G | -0.032 | 6.7 | 2.65E-11 | 1.18E-06 | Sitting height, intelligence, Frequency of unenthusiasm, Mood swings                                |
| depression-driven GERD | rs1716171  | 12 | 123716376 | MPHOSPH9, C12orf65                    | C | T | -0.038 | 6.5 | 7.82E-11 | 1.78E-05 | Height, Lymphocyte percentage, Platelet crit                                                        |
| depression-driven GERD | rs7600261  | 2  | 212622818 | ERBB4                                 | C | T | -0.034 | 6.5 | 9.47E-11 | 5.64E-07 | University qualifications, average total household income before tax, salt added to food, depressed |
| depression-driven GERD | rs1021363  | 10 | 106610839 | SORCS3                                | A | G | 0.031  | 6.2 | 5.10E-10 | 3.34E-06 | Seen doctor for nerves, anxiety or depression                                                       |
| depression-driven GERD | rs7241572  | 18 | 77580712  | KCNG2                                 | G | A | -0.037 | 6.1 | 9.49E-10 | 1.72E-04 | Age first had sexual intercourse, wheeze or whistling in the chest in last year, Neutrophil count   |
| depression-driven GERD | rs957345   | 14 | 75276079  | YLPM1, PROX2, EIF2B2                  | C | G | -0.029 | -6  | 1.72E-09 | 1.43E-06 | Number of treatment/medications taken, Neuroticism score, Leg fat percentage, Nervous feelings      |

|                        |            |    |           |              |   |   |        |     |          |          |                                                                                                   |
|------------------------|------------|----|-----------|--------------|---|---|--------|-----|----------|----------|---------------------------------------------------------------------------------------------------|
| depression-driven GERD | rs9373363  | 6  | 143150043 | HIVEP2       | A | G | 0.033  | 5.9 | 4.13E-09 | 5.42E-10 | Leg fat percentage, usual walking pace, time spent watching TV                                    |
| depression-driven GERD | rs2734839  | 11 | 113286490 | TTC12, ANKK1 | C | T | 0.028  | 5.8 | 8.79E-09 | 1.68E-05 | Neuroticism, Plays computer games, Guilty feelings                                                |
| depression-driven GERD | rs2043539  | 7  | 12253880  | TMEM106B     | G | A | -0.027 | -   | 2.24E-08 | 3.87E-05 | Seen doctor for anxiety (nerves/anxiety/ depression), depression, Neuroticism score               |
| depression-driven GERD | rs3793577  | 9  | 23737627  | ELAVL2       | A | G | -0.027 | -   | 2.49E-08 | 1.00E-05 | Neuroticism, Frequency of depressed mood in last 2 weeks, Guilty feelings, depression             |
| depression-driven GERD | rs9540720  | 13 | 66922705  | PCDH9        | A | G | -0.027 | -   | 3.01E-08 | 3.32E-07 | Heartburn medication, breastfed as a baby                                                         |
| depression-driven GERD | rs324769   | 12 | 83969240  |              | C | T | 0.027  | 5.5 | 3.05E-08 | 3.75E-07 | University qualifications, Forced vital capacity, age first had sexual intercourse, sleeplessness |
| depression-driven GERD | rs11953061 | 5  | 120144025 |              | C | T | -0.028 | -   | 3.10E-08 | 3.72E-06 | Ibuprofen medication, Long-standing illness/disability                                            |

The complete list of genome-wide loci including more detailed SNP-summary information can be found in Supplementary Table ST2. SNPs reported here were selected based on availability of gene eQTL information and evidence of replication at bonferroni correction of  $P=0.05/88$  in the 23andMe cohort. We preferentially report the top PheWAS associations based on p-value of association and only one per trait category (i.e. highly correlated phenotypes are not presented). Only traits with a trait-association P-value  $< 1 \times 10^{-6}$  were reported.

**ST11. Queried obesity-driven GERD gene in FUMA (gene2func)**

| ensg            | entrezID | symbol  | hgnc_symbol | OMIM   | uniprotID | DrugBank |
|-----------------|----------|---------|-------------|--------|-----------|----------|
| ENSG00000084636 | 1307     | COL16A1 | COL16A1     | 120326 | Q07092    | NA       |
| ENSG00000184588 | 5142     | PDE4B   | PDE4B       | 600127 | Q07343    | NA       |
| ENSG00000172260 | 257194   | NEGR1   | NEGR1       | 613173 | Q7Z3B1    | NA       |
| ENSG00000188641 | 1806     | DPYD    | DPYD        | 612779 | Q12882    | NA       |
| ENSG00000116406 | 80267    | EDEM3   | EDEM3       | 610214 | Q9BZQ6    | NA       |
| ENSG00000134369 | 89796    | NAV1    | NAV1        | 611628 | Q8NEY1    | NA       |
| ENSG00000198700 | 55705    | IPO9    | IPO9        | NA     | Q96P70    | NA       |
| ENSG00000163431 | 25802    | LMOD1   | LMOD1       | 602715 | P29536    | NA       |
| ENSG00000078114 | 10529    | NEBL    | NEBL        | 605491 | O76041    | NA       |
| ENSG00000171798 | 85442    | KNDC1   | KNDC1       | 616237 | Q76NI1    | NA       |
| ENSG00000182704 | 25987    | TSKU    | TSKU        | 608015 | Q8WUA8    | NA       |
| ENSG00000134533 | 85004    | RERG    | RERG        | 612664 | Q96A58    | NA       |
| ENSG00000123374 | 1017     | CDK2    | CDK2        | 116953 | P24941    | NA       |
| ENSG00000111540 | 5869     | RAB5B   | RAB5B       | 179514 | P61020    | NA       |
| ENSG00000139531 | 6821     | SUOX    | SUOX        | 606887 | P51687    | NA       |
| ENSG00000065361 | 2065     | ERBB3   | ERBB3       | 190151 | P21860    | NA       |
| ENSG00000118946 | 27253    | PCDH17  | PCDH17      | 611760 | O14917    | NA       |
| ENSG00000152767 | 10160    | FARP1   | FARP1       | 602654 | Q9Y4F1    | NA       |
| ENSG00000102572 | 8428     | STK24   | STK24       | 604984 | Q9Y6E0    | NA       |
| ENSG00000133958 | 57578    | UNC79   | UNC79       | 616884 | Q9P2D8    | NA       |
| ENSG00000187581 | 341947   | COX8C   | COX8C       | 616855 | Q7Z4L0    | NA       |
| ENSG00000131323 | 7187     | TRAF3   | TRAF3       | 601896 | Q13114    | NA       |
| ENSG00000166126 | 81693    | AMN     | AMN         | 605799 | Q9BXJ7    | NA       |
| ENSG00000140718 | 79068    | FTO     | FTO         | 610966 | Q9C0B1    | NA       |
| ENSG00000140945 | 1012     | CDH13   | CDH13       | 601364 | P55290    | NA       |
| ENSG00000130517 | 54858    | PGPEP1  | PGPEP1      | 610694 | Q9NXJ5    | NA       |

|                 |       |            |          |        |        |    |
|-----------------|-------|------------|----------|--------|--------|----|
| ENSG0000006015  | 55049 | C19orf60   | C19orf60 | NA     | Q96EN9 | NA |
| ENSG00000105662 | 23373 | CRTC1      | CRTC1    | 607536 | Q6UUV9 | NA |
| ENSG00000119866 | 53335 | BCL11A     | BCL11A   | 606557 | Q9H165 | NA |
| ENSG00000182240 | 25825 | BACE2      | BACE2    | 605668 | Q9Y5Z0 | NA |
| ENSG00000197381 | 104   | ADARB1     | ADARB1   | 601218 | P78563 | NA |
| ENSG00000219438 | 25817 | FAM19A5    | FAM19A5  | 617499 | Q7Z5A7 | NA |
| ENSG00000172995 | 10777 | ARPP21     | ARPP21   | 605488 | Q9UBL0 | NA |
| ENSG00000145020 | 275   | AMT        | AMT      | 238310 | P48728 | NA |
| ENSG0000004534  | 10180 | RBM6       | RBM6     | 606886 | P78332 | NA |
| ENSG0000003756  | 10181 | RBM5       | RBM5     | 606884 | P52756 | NA |
| ENSG00000170017 | 214   | ALCAM      | ALCAM    | 601662 | Q13740 | NA |
| ENSG00000254531 | 90024 | AP001816.1 | FLJ20021 | NA     | NA     | NA |
| ENSG00000138821 | 64116 | SLC39A8    | SLC39A8  | 608732 | Q9C0K1 | NA |
| ENSG00000196782 | 55534 | MAML3      | MAML3    | 608991 | Q96JK9 | NA |
| ENSG00000043143 | 23338 | JADE2      | JADE2    | 610515 | Q9NQC1 | NA |
| ENSG00000065060 | 54887 | UHRF1BP1   | UHRF1BP1 | NA     | Q6BDS2 | NA |
| ENSG00000002822 | 8379  | MAD1L1     | MAD1L1   | 602686 | Q9Y6D9 | NA |
| ENSG00000122687 | 29960 | FTSJ2      | FTSJ2    | 606906 | Q9UI43 | NA |
| ENSG00000154678 | 5137  | PDE1C      | PDE1C    | 602987 | Q14123 | NA |
| ENSG00000128573 | 93986 | FOXP2      | FOXP2    | 605317 | O15409 | NA |
| ENSG00000147601 | 7013  | TERF1      | TERF1    | 600951 | P54274 | NA |
| ENSG00000160563 | 9442  | MED27      | MED27    | 605044 | Q6P2C8 | NA |

**ST12. Queried depression-driven GERD gene in FUMA (gene2func)**

| ensg            | entrezID | symbol  | hgnc_symbol | OMIM   | uniprotID | DrugBank |
|-----------------|----------|---------|-------------|--------|-----------|----------|
| ENSG00000130766 | 83667    | SESN2   | SESN2       | 607767 | P58004    | NA       |
| ENSG00000198492 | 51441    | YTHDF2  | YTHDF2      | 610640 | Q9Y5A9    | NA       |
| ENSG00000116329 | 4985     | OPRD1   | OPRD1       | 165195 | P41143    | NA       |
| ENSG00000156395 | 22986    | SORCS3  | SORCS3      | 606285 | Q9UPU3    | NA       |
| ENSG00000149292 | 54970    | TTC12   | TTC12       | 610732 | Q9H892    | NA       |
| ENSG00000170209 | 255239   | ANKK1   | ANKK1       | 608774 | Q8NFD2    | NA       |
| ENSG00000187676 | 145173   | B3GALTL | B3GALTL     | 610308 | Q6Y288    | NA       |
| ENSG00000184226 | 5101     | PCDH9   | PCDH9       | 603581 | Q9HC56    | NA       |
| ENSG00000119596 | 56252    | YLPM1   | YLPM1       | NA     | P49750    | NA       |
| ENSG00000119608 | 283571   | PROX2   | PROX2       | 615094 | Q3B8N5    | NA       |
| ENSG00000119718 | 8892     | EIF2B2  | EIF2B2      | 606454 | P49770    | NA       |
| ENSG00000103449 | 6299     | SALL1   | SALL1       | 602218 | Q9NSC2    | NA       |
| ENSG00000101489 | 56853    | CELF4   | CELF4       | 612679 | Q9BZC1    | NA       |
| ENSG00000187323 | 1630     | DCC     | DCC         | 120470 | P43146    | NA       |
| ENSG00000196628 | 6925     | TCF4    | TCF4        | 602272 | P15884    | NA       |
| ENSG00000178342 | 26251    | KCNG2   | KCNG2       | 605696 | Q9UJ96    | NA       |
| ENSG00000178568 | 2066     | ERBB4   | ERBB4       | 600543 | Q15303    | NA       |
| ENSG00000151276 | 9223     | MAGI1   | MAGI1       | 602625 | Q96QZ7    | NA       |
| ENSG00000125388 | 2868     | GRK4    | GRK4        | 137026 | P32298    | NA       |
| ENSG00000197386 | 3064     | HTT     | HTT         | 613004 | P42858    | NA       |
| ENSG00000188981 | 345222   | MSANTD1 | MSANTD1     | NA     | Q6ZTZ1    | NA       |
| ENSG00000052795 | 57600    | FNIP2   | FNIP2       | 612768 | Q9P278    | NA       |
| ENSG00000164123 | 152940   | C4orf45 | C4orf45     | NA     | Q96LM5    | NA       |
| ENSG00000109756 | 9693     | RAPGEF2 | RAPGEF2     | 609530 | Q9Y4G8    | NA       |
| ENSG00000124508 | 10385    | BTN2A2  | BTN2A2      | 613591 | Q8WVV5    | NA       |
| ENSG00000111801 | 10384    | BTN3A3  | BTN3A3      | 613595 | O00478    | NA       |

|                 |       |          |          |        |        |    |
|-----------------|-------|----------|----------|--------|--------|----|
| ENSG00000112763 | 11120 | BTN2A1   | BTN2A1   | 613590 | Q7KYR7 | NA |
| ENSG00000124557 | 696   | BTN1A1   | BTN1A1   | 601610 | Q13410 | NA |
| ENSG00000182952 | 10473 | HMG4     | HMG4     | NA     | O00479 | NA |
| ENSG0000010818  | 3097  | HIVEP2   | HIVEP2   | 143054 | P31629 | NA |
| ENSG0000091831  | 2099  | ESR1     | ESR1     | 133430 | P03372 | NA |
| ENSG00000106460 | 54664 | TMEM106B | TMEM106B | 613413 | Q9NUM4 | NA |
| ENSG00000107105 | 1993  | ELAVL2   | ELAVL2   | 601673 | Q12926 | NA |

**ST13. Parameters for the Gene2func FUMA analysis for the subgroup GERD genes**

| Settings     | Configuration for Obesity-driven GERD genes                                                                                                                                                                                                                                                         | Configuration for depression-driven GERD genes                                                                                                                                                                    |
|--------------|-----------------------------------------------------------------------------------------------------------------------------------------------------------------------------------------------------------------------------------------------------------------------------------------------------|-------------------------------------------------------------------------------------------------------------------------------------------------------------------------------------------------------------------|
| FUMA         | v1.3.6                                                                                                                                                                                                                                                                                              | v1.3.6                                                                                                                                                                                                            |
| MsigDB       | v7.0                                                                                                                                                                                                                                                                                                | v7.0                                                                                                                                                                                                              |
| WikiPathways | 20191010                                                                                                                                                                                                                                                                                            | 20191010                                                                                                                                                                                                          |
| GWAScatalog  | e96_r2019-09-24                                                                                                                                                                                                                                                                                     | e96_r2019-09-24                                                                                                                                                                                                   |
| [params]     |                                                                                                                                                                                                                                                                                                     |                                                                                                                                                                                                                   |
| gtype        | text                                                                                                                                                                                                                                                                                                | text                                                                                                                                                                                                              |
| gval         | NEBL:KNDC1:TSKU:RERG:CDK2:SUXO:ERBB3:RAB5B:PCDH17:STK24:FARP1:UNC79:COX8C:TRAF3:AMN:FTO:CDH13:PGPEP1:C19orf60:CRTC1:COL16A1:PDE4B:NEGR1:DPYD:EDEM3:NAV1:LMO1:IPO9:BACE2:ADARB1:FAM19A5:BCL11A:ARPP21:RBM5:RBM6:AMT:ALCAM:FLJ20021:SLC39A8:MAML3:JADE2:UHRF1BP1:FTSJ2:MAD1L1:PDE1C:FOXP2:TERF1:MED27 | SORCS3:TTC12:ANKK1:B3GALTL:PCDH9:YLPM1:PROX2:EIF2B2:SALL1:CELF4:DCC:TCF4:KCNG2:OPRD1:YTHDF2:SESN2:ERBB4:MAGI1:GRK4:HTT:MSANTD1:RAPGEF2:FNIP2:C4orf45:HMG4:BTN2A1:BTN2A2:BTN1A1:BTN3A3:HIVEP2:ESR1:TMEM106B:ELAVL2 |
| bkgtype      | select                                                                                                                                                                                                                                                                                              | select                                                                                                                                                                                                            |
| bkgval       | all                                                                                                                                                                                                                                                                                                 | all                                                                                                                                                                                                               |
| ensembl      | v92                                                                                                                                                                                                                                                                                                 | v92                                                                                                                                                                                                               |
| gsFileN      | 0                                                                                                                                                                                                                                                                                                   | 0                                                                                                                                                                                                                 |
| gsFiles      | NA                                                                                                                                                                                                                                                                                                  | NA                                                                                                                                                                                                                |
| gene_exp     | GTEEx/v8/gtex_v8_ts_avg_log2TPM:GTEEx/v8/gtex_v8_ts_general_avg_log2TPM                                                                                                                                                                                                                             | GTEEx/v8/gtex_v8_ts_avg_log2TPM:GTEEx/v8/gtex_v8_ts_general_avg_log2TPM                                                                                                                                           |
| MHC          | 1                                                                                                                                                                                                                                                                                                   | 1                                                                                                                                                                                                                 |
| adjPmeth     | fdr_bh                                                                                                                                                                                                                                                                                              | fdr_bh                                                                                                                                                                                                            |
| adjPcut      | 0.05                                                                                                                                                                                                                                                                                                | 0.05                                                                                                                                                                                                              |
| minOverlap   | 2                                                                                                                                                                                                                                                                                                   | 2                                                                                                                                                                                                                 |

**ST14. Additional analysis - subgroup-specific GERD genes enrichment analysis (MAGMA)**

| Gene subgroup      | Category | GeneSet                              | N genes | N overlap | p           | adjP        | genes                                                                                                                                                                                                                                                                         |
|--------------------|----------|--------------------------------------|---------|-----------|-------------|-------------|-------------------------------------------------------------------------------------------------------------------------------------------------------------------------------------------------------------------------------------------------------------------------------|
| Obesity-GERD genes | DEG.up   | Adipose_Subcutaneous                 | 2107    | 8         | 0.015207452 | 0.82120239  | ENSG00000182704:ENSG00000134533:ENSG00000172260:ENSG0000188641:ENSG00000134369:ENSG00000163431:ENSG00000182240:ENSG00000254531                                                                                                                                                |
| Obesity-GERD genes | DEG.up   | Adipose_Visceral_Omentum             | 1764    | 6         | 0.054713394 | 1           | ENSG00000182704:ENSG00000134533:ENSG00000172260:ENSG0000188641:ENSG00000134369:ENSG00000138821                                                                                                                                                                                |
| Obesity-GERD genes | DEG.up   | Adrenal_Gland                        | 1540    | 4         | 0.217031765 | 1           | ENSG00000171798:ENSG00000134533:ENSG00000139531:ENSG0000130517                                                                                                                                                                                                                |
| Obesity-GERD genes | DEG.up   | Artery_Aorta                         | 2756    | 13        | 0.000218024 | 0.011773282 | ENSG00000134533:ENSG00000140945:ENSG00000084636:ENSG0000116406:ENSG00000134369:ENSG00000163431:ENSG00000182240:ENSG00000197381:ENSG00000219438:ENSG00000145020:ENSG00000170017:ENSG00000147601:ENSG00000160563                                                                |
| Obesity-GERD genes | DEG.up   | Artery_Coronary                      | 2038    | 12        | 4.99E-05    | 0.002694409 | ENSG00000182704:ENSG00000134533:ENSG00000140945:ENSG0000188641:ENSG00000116406:ENSG00000134369:ENSG00000163431:ENSG00000182240:ENSG00000197381:ENSG00000170017:ENSG00000147601:ENSG00000160563                                                                                |
| Obesity-GERD genes | DEG.up   | Artery_Tibial                        | 2711    | 17        | 3.16E-07    | 1.70E-05    | ENSG00000182704:ENSG00000134533:ENSG00000102572:ENSG0000152767:ENSG00000140718:ENSG00000140945:ENSG00000184588:ENSG00000172260:ENSG00000188641:ENSG00000163431:ENSG00000182240:ENSG00000197381:ENSG00000170017:ENSG0000043143:ENSG00000154678:ENSG00000147601:ENSG00000160563 |
| Obesity-GERD genes | DEG.up   | Bladder                              | 842     | 3         | 0.142840548 | 1           | ENSG00000182704:ENSG00000163431:ENSG00000147601                                                                                                                                                                                                                               |
| Obesity-GERD genes | DEG.up   | Brain_Amygdala                       | 1820    | 8         | 0.006593334 | 0.35604003  | ENSG00000078114:ENSG00000171798:ENSG00000118946:ENSG0000105662:ENSG00000184588:ENSG00000219438:ENSG00000172995:ENSG00000154678                                                                                                                                                |
| Obesity-GERD genes | DEG.up   | Brain_Anterior_cingulate_cortex_BA24 | 2370    | 9         | 0.009967435 | 0.538241516 | ENSG00000078114:ENSG00000171798:ENSG00000118946:ENSG0000133958:ENSG00000105662:ENSG00000172260:ENSG00000219438:ENSG00000119866:ENSG00000172995                                                                                                                                |

|                    |        |                                       |      |    |             |             |                                                                                                                                                                                                                                                                               |
|--------------------|--------|---------------------------------------|------|----|-------------|-------------|-------------------------------------------------------------------------------------------------------------------------------------------------------------------------------------------------------------------------------------------------------------------------------|
| Obesity-GERD genes | DEG.up | Brain_Caudate_basal_ganglia           | 2212 | 11 | 0.000476471 | 0.025729439 | ENSG00000078114:ENSG00000171798:ENSG00000118946:ENSG0000133958:ENSG00000105662:ENSG00000184588:ENSG00000219438:ENSG00000119866:ENSG00000172995:ENSG00000254531:ENSG00000154678                                                                                                |
| Obesity-GERD genes | DEG.up | Brain_Cerebellar_Hemisphere           | 6301 | 17 | 0.01143138  | 0.617294502 | ENSG00000078114:ENSG00000171798:ENSG00000133958:ENSG0000131323:ENSG00000140718:ENSG00000105662:ENSG00000172260:ENSG00000198700:ENSG00000197381:ENSG00000219438:ENSG00000172995:ENSG00000145020:ENSG00000254531:ENSG0000196782:ENSG00000043143:ENSG00000065060:ENSG00000147601 |
| Obesity-GERD genes | DEG.up | Brain_Cerebellum                      | 6164 | 16 | 0.020760346 | 1           | ENSG00000078114:ENSG00000171798:ENSG00000133958:ENSG0000131323:ENSG00000140718:ENSG00000105662:ENSG00000172260:ENSG00000198700:ENSG00000197381:ENSG00000219438:ENSG00000172995:ENSG00000145020:ENSG00000196782:ENSG0000043143:ENSG00000065060:ENSG00000147601                 |
| Obesity-GERD genes | DEG.up | Brain_Cortex                          | 2792 | 11 | 0.003171325 | 0.171251531 | ENSG00000078114:ENSG00000171798:ENSG00000133958:ENSG0000131323:ENSG00000105662:ENSG00000184588:ENSG00000172260:ENSG00000219438:ENSG00000119866:ENSG00000172995:ENSG00000154678                                                                                                |
| Obesity-GERD genes | DEG.up | Brain_Frontal_Cortex_BA9              | 3132 | 12 | 0.0025117   | 0.135631817 | ENSG00000078114:ENSG00000171798:ENSG00000118946:ENSG0000133958:ENSG00000131323:ENSG00000105662:ENSG00000184588:ENSG00000172260:ENSG00000219438:ENSG00000119866:ENSG00000172995:ENSG00000254531                                                                                |
| Obesity-GERD genes | DEG.up | Brain_Hippocampus                     | 1965 | 8  | 0.01027622  | 0.554915859 | ENSG00000078114:ENSG00000171798:ENSG00000133958:ENSG0000105662:ENSG00000184588:ENSG00000219438:ENSG00000119866:ENSG00000154678                                                                                                                                                |
| Obesity-GERD genes | DEG.up | Brain_Hypothalamus                    | 2531 | 8  | 0.040092427 | 1           | ENSG00000078114:ENSG00000171798:ENSG00000118946:ENSG0000133958:ENSG00000184588:ENSG00000219438:ENSG00000170017:ENSG00000154678                                                                                                                                                |
| Obesity-GERD genes | DEG.up | Brain_Nucleus_accumbens_basal_ganglia | 2451 | 11 | 0.001120673 | 0.06051633  | ENSG00000078114:ENSG00000171798:ENSG00000118946:ENSG0000133958:ENSG00000105662:ENSG00000184588:ENSG00000219438:ENSG00000119866:ENSG00000172995:ENSG00000254531:ENSG00000154678                                                                                                |
| Obesity-GERD genes | DEG.up | Brain_Putamen_basal_ganglia           | 1741 | 9  | 0.001291793 | 0.069756805 | ENSG00000078114:ENSG00000171798:ENSG00000118946:ENSG0000133958:ENSG00000105662:ENSG00000219438:ENSG00000119866:ENSG00000172995:ENSG00000154678                                                                                                                                |

|                    |        |                                     |      |    |             |             |                                                                                                                                                                                                                                |
|--------------------|--------|-------------------------------------|------|----|-------------|-------------|--------------------------------------------------------------------------------------------------------------------------------------------------------------------------------------------------------------------------------|
| Obesity-GERD genes | DEG.up | Brain_Spinal_cord_cervical_c-1      | 2224 | 8  | 0.020429945 | 1           | ENSG00000078114:ENSG00000065361:ENSG00000118946:ENSG0000130517:ENSG00000184588:ENSG00000219438:ENSG00000170017:ENSG00000154678                                                                                                 |
| Obesity-GERD genes | DEG.up | Brain_Substantia_nigra              | 1645 | 6  | 0.041285571 | 1           | ENSG00000078114:ENSG00000171798:ENSG00000118946:ENSG0000184588:ENSG00000219438:ENSG00000154678                                                                                                                                 |
| Obesity-GERD genes | DEG.up | Breast_Mammary_Tissue               | 1964 | 5  | 0.188601183 | 1           | ENSG00000182704:ENSG00000134533:ENSG00000184588:ENSG0000163431:ENSG00000182240                                                                                                                                                 |
| Obesity-GERD genes | DEG.up | Cells_Cultured_fibroblasts          | 4335 | 14 | 0.005042556 | 0.272297998 | ENSG00000123374:ENSG00000131323:ENSG00000140718:ENSG0000140945:ENSG00000084636:ENSG00000172260:ENSG00000188641:ENSG00000116406:ENSG00000134369:ENSG00000198700:ENSG00000197381:ENSG00000170017:ENSG00000138821:ENSG00000122687 |
| Obesity-GERD genes | DEG.up | Cells_EBV-transformed_lymphocytes   | 5069 | 12 | 0.084373899 | 1           | ENSG00000123374:ENSG00000102572:ENSG00000131323:ENSG0000130517:ENSG00000198700:ENSG00000119866:ENSG00000170017:ENSG00000138821:ENSG00000043143:ENSG00000065060:ENSG00000122687:ENSG00000002822                                 |
| Obesity-GERD genes | DEG.up | Cervix_Ectocervix                   | 193  | 1  | 0.260266594 | 1           | ENSG00000182704                                                                                                                                                                                                                |
| Obesity-GERD genes | DEG.up | Cervix_Endocervix                   | 1829 | 9  | 0.001818218 | 0.098183756 | ENSG00000182704:ENSG00000123374:ENSG00000139531:ENSG0000084636:ENSG00000188641:ENSG00000163431:ENSG00000198700:ENSG00000219438:ENSG00000147601                                                                                 |
| Obesity-GERD genes | DEG.up | Colon_Sigmoid                       | 1637 | 8  | 0.003496225 | 0.188796143 | ENSG00000134533:ENSG00000152767:ENSG00000172260:ENSG0000163431:ENSG00000197381:ENSG00000119866:ENSG00000145020:ENSG00000128573                                                                                                 |
| Obesity-GERD genes | DEG.up | Colon_Transverse                    | 1602 | 4  | 0.237757293 | 1           | ENSG00000065361:ENSG00000166126:ENSG00000130517:ENSG0000128573                                                                                                                                                                 |
| Obesity-GERD genes | DEG.up | Esophagus_Gastroesophageal_Junction | 1287 | 6  | 0.01432441  | 0.77351812  | ENSG00000123374:ENSG00000172260:ENSG00000163431:ENSG0000197381:ENSG00000154678:ENSG00000128573                                                                                                                                 |
| Obesity-GERD genes | DEG.up | Esophagus_Mucosa                    | 2231 | 5  | 0.265145042 | 1           | ENSG00000182704:ENSG00000065361:ENSG00000102572:ENSG0000166126:ENSG00000119866                                                                                                                                                 |

|                    |        |                        |      |    |             |             |                                                                                                                                                                                                 |
|--------------------|--------|------------------------|------|----|-------------|-------------|-------------------------------------------------------------------------------------------------------------------------------------------------------------------------------------------------|
| Obesity-GERD genes | DEG.up | Esophagus_Muscularis   | 1311 | 6  | 0.015565647 | 0.840544954 | ENSG00000123374:ENSG00000172260:ENSG00000163431:ENSG00000197381:ENSG00000154678:ENSG00000128573                                                                                                 |
| Obesity-GERD genes | DEG.up | Fallopian_Tube         | 485  | 4  | 0.006800861 | 0.367246501 | ENSG00000182704:ENSG00000134533:ENSG00000163431:ENSG00000145020                                                                                                                                 |
| Obesity-GERD genes | DEG.up | Heart_Atrial_Appendage | 743  | 3  | 0.108792046 | 1           | ENSG00000078114:ENSG00000138821:ENSG00000154678                                                                                                                                                 |
| Obesity-GERD genes | DEG.up | Heart_Left_Ventricle   | 536  | 2  | 0.202874789 | 1           | ENSG00000078114:ENSG00000154678                                                                                                                                                                 |
| Obesity-GERD genes | DEG.up | Kidney_Cortex          | 1327 | 3  | 0.341181258 | 1           | ENSG00000152767:ENSG00000166126:ENSG00000130517                                                                                                                                                 |
| Obesity-GERD genes | DEG.up | Kidney_Medulla         | 95   | 0  | 1           | 1           |                                                                                                                                                                                                 |
| Obesity-GERD genes | DEG.up | Liver                  | 1525 | 4  | 0.212099477 | 1           | ENSG00000182704:ENSG00000139531:ENSG00000065361:ENSG00000166126                                                                                                                                 |
| Obesity-GERD genes | DEG.up | Lung                   | 4195 | 12 | 0.024401752 | 1           | ENSG00000078114:ENSG00000123374:ENSG00000118946:ENSG00000152767:ENSG00000166126:ENSG00000140945:ENSG00000184588:ENSG00000188641:ENSG00000116406:ENSG00000197381:ENSG00000170017:ENSG00000138821 |
| Obesity-GERD genes | DEG.up | Minor_Salivary_Gland   | 1891 | 7  | 0.026087513 | 1           | ENSG00000078114:ENSG00000065361:ENSG00000152767:ENSG00000116406:ENSG00000182240:ENSG00000170017:ENSG00000138821                                                                                 |
| Obesity-GERD genes | DEG.up | Muscle_Skeletal        | 1143 | 2  | 0.535301347 | 1           | ENSG00000172995:ENSG00000065060                                                                                                                                                                 |
| Obesity-GERD genes | DEG.up | Nerve_Tibial           | 5869 | 12 | 0.18897049  | 1           | ENSG00000182704:ENSG00000065361:ENSG00000084636:ENSG00000172260:ENSG00000188641:ENSG00000163431:ENSG00000182240:ENSG00000219438:ENSG00000145020:ENSG00000043143:ENSG00000154678:ENSG00000147601 |
| Obesity-GERD genes | DEG.up | Ovary                  | 5674 | 15 | 0.022063133 | 1           | ENSG00000171798:ENSG00000182704:ENSG00000134533:ENSG00000123374:ENSG00000139531:ENSG00000130517:ENSG00000084636:ENSG00000188641:ENSG00000145020:ENSG00000170017:E                               |

|                    |        |                                 |       |    |             |             |                                                                                                                                                                                                                                               |
|--------------------|--------|---------------------------------|-------|----|-------------|-------------|-----------------------------------------------------------------------------------------------------------------------------------------------------------------------------------------------------------------------------------------------|
|                    |        |                                 |       |    |             |             | NSG00000254531:ENSG00000196782:ENSG00000043143:ENSG0000128573:ENSG00000147601                                                                                                                                                                 |
| Obesity-GERD genes | DEG.up | Pancreas                        | 745   | 1  | 0.690961308 | 1           | ENSG00000138821                                                                                                                                                                                                                               |
| Obesity-GERD genes | DEG.up | Pituitary                       | 5156  | 10 | 0.274034996 | 1           | ENSG00000078114:ENSG00000171798:ENSG00000152767:ENSG0000133958:ENSG00000131323:ENSG00000130517:ENSG00000105662:ENSG00000116406:ENSG00000145020:ENSG00000196782                                                                                |
| Obesity-GERD genes | DEG.up | Prostate                        | 3306  | 10 | 0.028751027 | 1           | ENSG00000182704:ENSG00000139531:ENSG00000065361:ENSG0000152767:ENSG00000130517:ENSG00000084636:ENSG00000163431:ENSG00000182240:ENSG00000145020:ENSG00000254531                                                                                |
| Obesity-GERD genes | DEG.up | Skin_Not_Sun_Exposed_Suprapubic | 2741  | 7  | 0.130185545 | 1           | ENSG00000182704:ENSG00000123374:ENSG00000065361:ENSG0000102572:ENSG00000166126:ENSG00000119866:ENSG00000196782                                                                                                                                |
| Obesity-GERD genes | DEG.up | Skin_Sun_Exposed_Lower_Leg      | 2801  | 9  | 0.027039114 | 1           | ENSG00000182704:ENSG00000123374:ENSG00000065361:ENSG0000102572:ENSG00000166126:ENSG00000140945:ENSG00000119866:ENSG00000196782:ENSG00000002822                                                                                                |
| Obesity-GERD genes | DEG.up | Small_Intestine_Terminal_Ileum  | 2738  | 5  | 0.424131055 | 1           | ENSG00000065361:ENSG00000131323:ENSG00000166126:ENSG0000130517:ENSG00000119866                                                                                                                                                                |
| Obesity-GERD genes | DEG.up | Spleen                          | 4240  | 7  | 0.495641449 | 1           | ENSG00000118946:ENSG00000131323:ENSG00000130517:ENSG0000184588:ENSG00000119866:ENSG00000043143:ENSG00000002822                                                                                                                                |
| Obesity-GERD genes | DEG.up | Stomach                         | 1102  | 3  | 0.245153255 | 1           | ENSG00000065361:ENSG00000166126:ENSG00000182240                                                                                                                                                                                               |
| Obesity-GERD genes | DEG.up | Testis                          | 12326 | 7  | 0.999969339 | 1           | ENSG00000118946:ENSG00000133958:ENSG00000187581:ENSG0000131323:ENSG00000065060:ENSG00000002822:ENSG00000160563                                                                                                                                |
| Obesity-GERD genes | DEG.up | Thyroid                         | 5687  | 11 | 0.261323348 | 1           | ENSG00000078114:ENSG00000182704:ENSG00000139531:ENSG0000152767:ENSG00000105662:ENSG00000084636:ENSG00000198700:ENSG00000145020:ENSG00000170017:ENSG00000065060:ENSG00000128573                                                                |
| Obesity-GERD genes | DEG.up | Uterus                          | 5544  | 15 | 0.018103777 | 0.977603966 | ENSG00000182704:ENSG00000134533:ENSG00000123374:ENSG0000139531:ENSG00000140945:ENSG00000163431:ENSG00000198700:ENSG00000182240:ENSG00000197381:ENSG00000145020:ENSG00000196782:ENSG00000043143:ENSG00000128573:ENSG0000147601:ENSG00000160563 |

|                    |          |                          |      |    |             |             |                                                                                                                                                                                                                                                                                                                                                              |
|--------------------|----------|--------------------------|------|----|-------------|-------------|--------------------------------------------------------------------------------------------------------------------------------------------------------------------------------------------------------------------------------------------------------------------------------------------------------------------------------------------------------------|
| Obesity-GERD genes | DEG.up   | Vagina                   | 2840 | 9  | 0.02924927  | 1           | ENSG00000182704:ENSG00000134533:ENSG00000065361:ENSG0000102572:ENSG00000166126:ENSG00000140945:ENSG00000188641:ENSG00000119866:ENSG00000196782                                                                                                                                                                                                               |
| Obesity-GERD genes | DEG.up   | Whole_Blood              | 2033 | 1  | 0.962175671 | 1           | ENSG00000188641                                                                                                                                                                                                                                                                                                                                              |
| Obesity-GERD genes | DEG.down | Adipose_Subcutaneous     | 1527 | 6  | 0.030274964 | 1           | ENSG00000078114:ENSG00000065361:ENSG00000118946:ENSG0000219438:ENSG00000170017:ENSG00000154678                                                                                                                                                                                                                                                               |
| Obesity-GERD genes | DEG.down | Adipose_Visceral_Omentum | 1650 | 5  | 0.1122764   | 1           | ENSG00000078114:ENSG00000065361:ENSG00000105662:ENSG0000219438:ENSG00000170017                                                                                                                                                                                                                                                                               |
| Obesity-GERD genes | DEG.down | Adrenal_Gland            | 3472 | 16 | 4.19E-05    | 0.002264981 | ENSG00000078114:ENSG00000182704:ENSG00000123374:ENSG0000118946:ENSG00000102572:ENSG00000131323:ENSG00000105662:ENSG00000084636:ENSG00000184588:ENSG00000134369:ENSG00000182240:ENSG00000197381:ENSG00000219438:ENSG0000170017:ENSG00000138821:ENSG00000002822                                                                                                |
| Obesity-GERD genes | DEG.down | Artery_Aorta             | 1460 | 4  | 0.191140558 | 1           | ENSG00000118946:ENSG00000152767:ENSG00000138821:ENSG0000154678                                                                                                                                                                                                                                                                                               |
| Obesity-GERD genes | DEG.down | Artery_Coronary          | 949  | 2  | 0.436926609 | 1           | ENSG00000078114:ENSG00000065361                                                                                                                                                                                                                                                                                                                              |
| Obesity-GERD genes | DEG.down | Artery_Tibial            | 2027 | 3  | 0.618902265 | 1           | ENSG00000065361:ENSG00000219438:ENSG00000138821                                                                                                                                                                                                                                                                                                              |
| Obesity-GERD genes | DEG.down | Bladder                  | 104  | 0  | 1           | 1           |                                                                                                                                                                                                                                                                                                                                                              |
| Obesity-GERD genes | DEG.down | Brain_Amygdala           | 7678 | 22 | 0.001281046 | 0.06917649  | ENSG00000182704:ENSG00000134533:ENSG00000123374:ENSG0000139531:ENSG00000102572:ENSG00000188641:ENSG00000116406:ENSG00000163431:ENSG00000198700:ENSG00000182240:ENSG00000197381:ENSG0000003756:ENSG00000004534:ENSG0000145020:ENSG00000138821:ENSG00000196782:ENSG00000043143:ENSG00000065060:ENSG00000122687:ENSG00000002822:ENSG00000147601:ENSG00000160563 |

|                    |          |                                      |      |    |             |             |                                                                                                                                                                                                                                                                                                                |
|--------------------|----------|--------------------------------------|------|----|-------------|-------------|----------------------------------------------------------------------------------------------------------------------------------------------------------------------------------------------------------------------------------------------------------------------------------------------------------------|
| Obesity-GERD genes | DEG.down | Brain_Anterior_cingulate_cortex_BA24 | 6651 | 14 | 0.135174757 | 1           | ENSG00000182704:ENSG00000123374:ENSG00000065361:ENSG00000102572:ENSG00000188641:ENSG00000116406:ENSG00000163431:ENSG00000182240:ENSG00000197381:ENSG00000145020:ENSG00000138821:ENSG00000043143:ENSG00000065060:ENSG0000002822                                                                                 |
| Obesity-GERD genes | DEG.down | Brain_Caudate_basal_ganglia          | 6858 | 17 | 0.025632519 | 1           | ENSG00000182704:ENSG00000123374:ENSG00000102572:ENSG00000140945:ENSG00000188641:ENSG00000116406:ENSG00000134369:ENSG00000163431:ENSG00000182240:ENSG00000197381:ENSG00000145020:ENSG00000196782:ENSG00000043143:ENSG00000065060:ENSG00000122687:ENSG00000128573:ENSG00000160563                                |
| Obesity-GERD genes | DEG.down | Brain_Cerebellar_Hemisphere          | 2607 | 9  | 0.017801207 | 0.961265165 | ENSG00000134533:ENSG00000123374:ENSG00000065361:ENSG00000102572:ENSG00000152767:ENSG00000084636:ENSG00000134369:ENSG00000163431:ENSG00000170017                                                                                                                                                                |
| Obesity-GERD genes | DEG.down | Brain_Cerebellum                     | 2739 | 10 | 0.008517982 | 0.459971004 | ENSG00000182704:ENSG00000134533:ENSG00000123374:ENSG00000065361:ENSG00000102572:ENSG00000152767:ENSG00000134369:ENSG00000163431:ENSG00000170017:ENSG00000138821                                                                                                                                                |
| Obesity-GERD genes | DEG.down | Brain_Cortex                         | 5556 | 12 | 0.142195304 | 1           | ENSG00000182704:ENSG00000123374:ENSG00000102572:ENSG00000188641:ENSG00000116406:ENSG00000163431:ENSG00000182240:ENSG00000197381:ENSG00000145020:ENSG00000138821:ENSG00000196782:ENSG00000065060                                                                                                                |
| Obesity-GERD genes | DEG.down | Brain_Frontal_Cortex_BA9             | 5015 | 12 | 0.079102551 | 1           | ENSG00000182704:ENSG00000123374:ENSG00000102572:ENSG00000188641:ENSG00000116406:ENSG00000163431:ENSG00000182240:ENSG00000145020:ENSG00000138821:ENSG00000196782:ENSG00000065060:ENSG00000128573                                                                                                                |
| Obesity-GERD genes | DEG.down | Brain_Hippocampus                    | 7493 | 19 | 0.01349087  | 0.728506969 | ENSG00000182704:ENSG00000134533:ENSG00000123374:ENSG00000139531:ENSG00000102572:ENSG00000140945:ENSG00000188641:ENSG00000116406:ENSG00000163431:ENSG00000198700:ENSG00000182240:ENSG00000197381:ENSG00000145020:ENSG00000138821:ENSG00000196782:ENSG00000043143:ENSG00000065060:ENSG00000122687:ENSG0000002822 |
| Obesity-GERD genes | DEG.down | Brain_Hypothalamus                   | 5904 | 17 | 0.005901524 | 0.318682298 | ENSG00000182704:ENSG00000134533:ENSG00000123374:ENSG00000139531:ENSG00000102572:ENSG00000188641:ENSG00000116406:ENSG00000163431:ENSG00000182240:ENSG00000197381:ENSG00000145020:ENSG00000138821:ENSG00000196782:ENSG00000065060:ENSG00000122687:ENSG0000002822:ENSG00000160563                                 |

|                    |          |                                       |      |    |             |             |                                                                                                                                                                                                                                                                                                                                                                                 |
|--------------------|----------|---------------------------------------|------|----|-------------|-------------|---------------------------------------------------------------------------------------------------------------------------------------------------------------------------------------------------------------------------------------------------------------------------------------------------------------------------------------------------------------------------------|
| Obesity-GERD genes | DEG.down | Brain_Nucleus_accumbens_basal_ganglia | 6409 | 15 | 0.058304475 | 1           | ENSG00000182704:ENSG00000123374:ENSG00000102572:ENSG00000140945:ENSG00000188641:ENSG00000116406:ENSG00000134369:ENSG00000163431:ENSG00000197381:ENSG00000145020:ENSG00000138821:ENSG00000196782:ENSG00000065060:ENSG0000122687:ENSG00000160563                                                                                                                                  |
| Obesity-GERD genes | DEG.down | Brain_Putamen_basal_ganglia           | 7776 | 23 | 0.000558306 | 0.030148527 | ENSG00000182704:ENSG00000123374:ENSG00000139531:ENSG00000102572:ENSG00000131323:ENSG00000140945:ENSG00000172260:ENSG00000188641:ENSG00000116406:ENSG00000134369:ENSG00000163431:ENSG00000198700:ENSG00000182240:ENSG00000197381:ENSG0000003756:ENSG0000004534:ENSG00000145020:ENSG00000138821:ENSG00000043143:ENSG00000065060:ENSG00000122687:ENSG00000147601:ENSG00000160563   |
| Obesity-GERD genes | DEG.down | Brain_Spinal_cord_cervical_c-1        | 5083 | 15 | 0.008346133 | 0.450691201 | ENSG00000182704:ENSG00000134533:ENSG00000123374:ENSG00000139531:ENSG00000102572:ENSG00000152767:ENSG00000140945:ENSG00000188641:ENSG00000116406:ENSG00000163431:ENSG00000197381:ENSG00000172995:ENSG00000145020:ENSG00000254531:ENSG00000196782                                                                                                                                 |
| Obesity-GERD genes | DEG.down | Brain_Substantia_nigra                | 7162 | 23 | 0.000154191 | 0.00832631  | ENSG00000182704:ENSG00000134533:ENSG00000123374:ENSG00000139531:ENSG00000102572:ENSG00000152767:ENSG00000140945:ENSG00000105662:ENSG00000188641:ENSG00000116406:ENSG00000163431:ENSG00000198700:ENSG00000182240:ENSG00000197381:ENSG00000119866:ENSG00000145020:ENSG00000254531:ENSG00000196782:ENSG00000043143:ENSG00000065060:ENSG00000122687:ENSG00000002822:ENSG00000160563 |
| Obesity-GERD genes | DEG.down | Breast_Mammary_Tissue                 | 1001 | 4  | 0.069734737 | 1           | ENSG00000118946:ENSG00000166126:ENSG00000219438:ENSG00000119866                                                                                                                                                                                                                                                                                                                 |
| Obesity-GERD genes | DEG.down | Cells_Cultured_fibroblasts            | 2143 | 5  | 0.239012295 | 1           | ENSG00000078114:ENSG00000163431:ENSG00000219438:ENSG00000145020:ENSG00000196782                                                                                                                                                                                                                                                                                                 |
| Obesity-GERD genes | DEG.down | Cells_EBV-transformed_lymphocytes     | 2383 | 7  | 0.07414719  | 1           | ENSG00000152767:ENSG00000105662:ENSG00000084636:ENSG00000188641:ENSG00000182240:ENSG00000145020:ENSG00000254531                                                                                                                                                                                                                                                                 |
| Obesity-GERD genes | DEG.down | Cervix_Ectocervix                     | 2    | 0  | 1           | 1           |                                                                                                                                                                                                                                                                                                                                                                                 |

|                    |          |                                     |      |    |             |             |                                                                                                                                                                                                                                                                                                                                                                                      |
|--------------------|----------|-------------------------------------|------|----|-------------|-------------|--------------------------------------------------------------------------------------------------------------------------------------------------------------------------------------------------------------------------------------------------------------------------------------------------------------------------------------------------------------------------------------|
| Obesity-GERD genes | DEG.down | Cervix_Endocervix                   | 5    | 0  | 1           | 1           |                                                                                                                                                                                                                                                                                                                                                                                      |
| Obesity-GERD genes | DEG.down | Colon_Sigmoid                       | 1676 | 4  | 0.263115089 | 1           | ENSG00000182704:ENSG00000140945:ENSG00000184588:ENSG0000138821                                                                                                                                                                                                                                                                                                                       |
| Obesity-GERD genes | DEG.down | Colon_Transverse                    | 1583 | 5  | 0.098424659 | 1           | ENSG00000078114:ENSG00000118946:ENSG00000140945:ENSG0000184588:ENSG00000154678                                                                                                                                                                                                                                                                                                       |
| Obesity-GERD genes | DEG.down | Esophagus_Gastroesophageal Junction | 1558 | 4  | 0.222994264 | 1           | ENSG00000140945:ENSG00000184588:ENSG00000119866:ENSG0000138821                                                                                                                                                                                                                                                                                                                       |
| Obesity-GERD genes | DEG.down | Esophagus_Mucosa                    | 3580 | 19 | 6.53E-07    | 3.53E-05    | ENSG00000134533:ENSG00000118946:ENSG00000152767:ENSG0000140718:ENSG00000140945:ENSG00000130517:ENSG00000105662:ENSG00000084636:ENSG00000184588:ENSG00000172260:ENSG00000197381:ENSG00000219438:ENSG00000145020:ENSG0000170017:ENSG00000254531:ENSG00000138821:ENSG00000043143:ENSG00000154678:ENSG00000147601                                                                        |
| Obesity-GERD genes | DEG.down | Esophagus_Muscularis                | 1761 | 5  | 0.137215659 | 1           | ENSG00000140945:ENSG00000184588:ENSG00000219438:ENSG0000119866:ENSG00000138821                                                                                                                                                                                                                                                                                                       |
| Obesity-GERD genes | DEG.down | Fallopian_Tube                      | 1    | 1  | 0.001555916 | 0.084019449 | ENSG00000078114                                                                                                                                                                                                                                                                                                                                                                      |
| Obesity-GERD genes | DEG.down | Heart_Atrial_Appendage              | 8409 | 23 | 0.001784562 | 0.096366348 | ENSG00000134533:ENSG00000123374:ENSG00000065361:ENSG0000118946:ENSG00000102572:ENSG00000152767:ENSG00000131323:ENSG00000140718:ENSG00000130517:ENSG00000105662:ENSG00000188641:ENSG00000116406:ENSG00000198700:ENSG0000197381:ENSG00000219438:ENSG00000170017:ENSG00000254531:ENSG00000196782:ENSG00000043143:ENSG00000122687:ENSG0000002822:ENSG00000147601:ENSG00000160563         |
| Obesity-GERD genes | DEG.down | Heart_Left_Ventricle                | 9443 | 30 | 5.01E-06    | 0.000270573 | ENSG00000182704:ENSG00000134533:ENSG00000123374:ENSG0000118946:ENSG00000102572:ENSG00000152767:ENSG00000131323:ENSG00000140718:ENSG00000130517:ENSG00000105662:ENSG00000084636:ENSG00000184588:ENSG00000172260:ENSG0000188641:ENSG00000116406:ENSG00000163431:ENSG00000198700:ENSG00000182240:ENSG00000197381:ENSG00000119866:ENSG0000003756:ENSG00000145020:ENSG00000170017:ENSG000 |

|                    |          |                      |      |    |             |             |                                                                                                                                                                                                                                                                                                                                                                |
|--------------------|----------|----------------------|------|----|-------------|-------------|----------------------------------------------------------------------------------------------------------------------------------------------------------------------------------------------------------------------------------------------------------------------------------------------------------------------------------------------------------------|
|                    |          |                      |      |    |             |             | 00254531:ENSG00000138821:ENSG00000043143:ENSG00000122687:ENSG00000002822:ENSG00000147601:ENSG00000160563                                                                                                                                                                                                                                                       |
| Obesity-GERD genes | DEG.down | Kidney_Cortex        | 5544 | 20 | 0.00011091  | 0.005989125 | ENSG00000123374:ENSG00000140718:ENSG00000140945:ENSG0000084636:ENSG00000184588:ENSG00000172260:ENSG00000188641:ENSG00000116406:ENSG00000134369:ENSG00000163431:ENSG00000198700:ENSG00000197381:ENSG00000219438:ENSG00000170017:ENSG00000254531:ENSG00000138821:ENSG00000196782:ENSG00000065060:ENSG00000002822:ENSG00000160563                                 |
| Obesity-GERD genes | DEG.down | Kidney_Medulla       | 0    | 0  | 1           | 1           |                                                                                                                                                                                                                                                                                                                                                                |
| Obesity-GERD genes | DEG.down | Liver                | 7985 | 22 | 0.002210643 | 0.119374735 | ENSG00000123374:ENSG00000111540:ENSG00000102572:ENSG00000131323:ENSG00000140718:ENSG00000105662:ENSG00000084636:ENSG00000184588:ENSG00000163431:ENSG00000198700:ENSG00000182240:ENSG00000197381:ENSG00000219438:ENSG000003756:ENSG00000254531:ENSG00000196782:ENSG00000043143:ENSG00000065060:ENSG00000122687:ENSG00000002822:ENSG00000147601:ENSG00000160563  |
| Obesity-GERD genes | DEG.down | Lung                 | 905  | 2  | 0.413151951 | 1           | ENSG00000219438:ENSG00000128573                                                                                                                                                                                                                                                                                                                                |
| Obesity-GERD genes | DEG.down | Minor_Salivary_Gland | 1861 | 7  | 0.024155991 | 1           | ENSG00000118946:ENSG00000140945:ENSG00000105662:ENSG00000172260:ENSG00000134369:ENSG00000197381:ENSG00000172995                                                                                                                                                                                                                                                |
| Obesity-GERD genes | DEG.down | Muscle_Skeletal      | 6836 | 22 | 0.000233236 | 0.012594762 | ENSG00000182704:ENSG00000134533:ENSG00000123374:ENSG0000065361:ENSG00000102572:ENSG00000152767:ENSG00000131323:ENSG00000105662:ENSG00000084636:ENSG00000172260:ENSG00000188641:ENSG00000134369:ENSG00000198700:ENSG00000182240:ENSG00000197381:ENSG00000004534:ENSG00000145020:ENSG00000254531:ENSG00000043143:ENSG00000128573:ENSG00000147601:ENSG00000160563 |
| Obesity-GERD genes | DEG.down | Nerve_Tibial         | 905  | 1  | 0.760757275 | 1           | ENSG00000140945                                                                                                                                                                                                                                                                                                                                                |
| Obesity-GERD genes | DEG.down | Ovary                | 1521 | 8  | 0.002222469 | 0.120013325 | ENSG00000078114:ENSG00000065361:ENSG00000118946:ENSG00000140945:ENSG00000184588:ENSG00000172260:ENSG00000134369:ENSG00000197381                                                                                                                                                                                                                                |

|                    |          |                                 |      |    |             |             |                                                                                                                                                                                                                                                                                                                                                                                                                                                |
|--------------------|----------|---------------------------------|------|----|-------------|-------------|------------------------------------------------------------------------------------------------------------------------------------------------------------------------------------------------------------------------------------------------------------------------------------------------------------------------------------------------------------------------------------------------------------------------------------------------|
| Obesity-GERD genes | DEG.down | Pancreas                        | 9586 | 27 | 0.000260415 | 0.014062399 | ENSG00000078114:ENSG00000182704:ENSG00000134533:ENSG00000123374:ENSG00000139531:ENSG00000111540:ENSG00000118946:ENSG00000102572:ENSG00000131323:ENSG00000140718:ENSG00000105662:ENSG00000084636:ENSG00000188641:ENSG00000134369:ENSG00000163431:ENSG00000198700:ENSG00000197381:ENSG00000219438:ENSG00000119866:ENSG00000254531:ENSG00000196782:ENSG00000043143:ENSG00000122687:ENSG0000002822:ENSG00000128573:ENSG00000147601:ENSG00000160563 |
| Obesity-GERD genes | DEG.down | Pituitary                       | 1927 | 13 | 5.18E-06    | 0.000279892 | ENSG00000134533:ENSG00000123374:ENSG00000065361:ENSG00000118946:ENSG00000102572:ENSG00000184588:ENSG00000172260:ENSG00000134369:ENSG00000163431:ENSG00000182240:ENSG00000197381:ENSG00000119866:ENSG00000154678                                                                                                                                                                                                                                |
| Obesity-GERD genes | DEG.down | Prostate                        | 742  | 2  | 0.321575376 | 1           | ENSG00000140945:ENSG00000172260                                                                                                                                                                                                                                                                                                                                                                                                                |
| Obesity-GERD genes | DEG.down | Skin_Not_Sun_Exposed_Suprapubic | 2691 | 10 | 0.007549056 | 0.407648999 | ENSG00000134533:ENSG00000139531:ENSG00000130517:ENSG00000105662:ENSG00000184588:ENSG00000172260:ENSG00000188641:ENSG00000116406:ENSG00000134369:ENSG00000219438                                                                                                                                                                                                                                                                                |
| Obesity-GERD genes | DEG.down | Skin_Sun_Exposed_Lower_Leg      | 2474 | 6  | 0.184201395 | 1           | ENSG00000139531:ENSG00000130517:ENSG00000105662:ENSG00000188641:ENSG00000116406:ENSG00000219438                                                                                                                                                                                                                                                                                                                                                |
| Obesity-GERD genes | DEG.down | Small_Intestine_Terminal_Ileum  | 1382 | 7  | 0.005258089 | 0.283936792 | ENSG00000078114:ENSG00000118946:ENSG00000140718:ENSG00000140945:ENSG00000172260:ENSG00000134369:ENSG00000219438                                                                                                                                                                                                                                                                                                                                |
| Obesity-GERD genes | DEG.down | Spleen                          | 2069 | 8  | 0.013745261 | 0.742244107 | ENSG00000182704:ENSG00000152767:ENSG00000166126:ENSG00000140718:ENSG00000140945:ENSG00000084636:ENSG00000134369:ENSG00000170017                                                                                                                                                                                                                                                                                                                |
| Obesity-GERD genes | DEG.down | Stomach                         | 2607 | 10 | 0.006063358 | 0.327421312 | ENSG00000078114:ENSG00000118946:ENSG00000131323:ENSG00000140718:ENSG00000140945:ENSG00000184588:ENSG00000134369:ENSG00000219438:ENSG00000138821:ENSG0000002822                                                                                                                                                                                                                                                                                 |
| Obesity-GERD genes | DEG.down | Testis                          | 2912 | 15 | 2.17E-05    | 0.001170076 | ENSG00000078114:ENSG00000065361:ENSG00000140718:ENSG00000140945:ENSG00000130517:ENSG00000184588:ENSG00000172260:ENSG00000188641:ENSG00000182240:ENSG00000197381:ENSG00000219438:ENSG00000119866:ENSG00000170017:ENSG00000138821:ENSG00000043143                                                                                                                                                                                                |

|                    |             |                          |      |    |             |             |                                                                                                                                                                                                                                                                                                                                 |
|--------------------|-------------|--------------------------|------|----|-------------|-------------|---------------------------------------------------------------------------------------------------------------------------------------------------------------------------------------------------------------------------------------------------------------------------------------------------------------------------------|
| Obesity-GERD genes | DEG.down    | Thyroid                  | 1038 | 7  | 0.001056217 | 0.057035718 | ENSG00000134533:ENSG00000140945:ENSG00000172260:ENSG00000197381:ENSG00000219438:ENSG00000119866:ENSG00000154678                                                                                                                                                                                                                 |
| Obesity-GERD genes | DEG.down    | Uterus                   | 843  | 2  | 0.378890776 | 1           | ENSG00000065361:ENSG00000184588                                                                                                                                                                                                                                                                                                 |
| Obesity-GERD genes | DEG.down    | Vagina                   | 647  | 3  | 0.079422438 | 1           | ENSG00000184588:ENSG00000170017:ENSG00000154678                                                                                                                                                                                                                                                                                 |
| Obesity-GERD genes | DEG.down    | Whole_Blood              | 6908 | 18 | 0.012752646 | 0.688642862 | ENSG00000123374:ENSG00000139531:ENSG00000102572:ENSG00000131323:ENSG00000105662:ENSG00000116406:ENSG00000198700:ENSG00000197381:ENSG00000119866:ENSG0000004534:ENSG00000145020:ENSG00000170017:ENSG00000254531:ENSG00000138821:ENSG00000065060:ENSG00000122687:ENSG00000147601:ENSG00000160563                                  |
| Obesity-GERD genes | DEG.twoside | Adipose_Subcutaneous     | 3634 | 14 | 0.000942377 | 0.050888353 | ENSG00000078114:ENSG00000182704:ENSG00000134533:ENSG00000065361:ENSG00000118946:ENSG00000172260:ENSG00000188641:ENSG00000134369:ENSG00000163431:ENSG00000182240:ENSG00000219438:ENSG00000170017:ENSG00000254531:ENSG00000154678                                                                                                 |
| Obesity-GERD genes | DEG.twoside | Adipose_Visceral_Omentum | 3414 | 11 | 0.014059844 | 0.759231579 | ENSG00000078114:ENSG00000182704:ENSG00000134533:ENSG00000065361:ENSG00000105662:ENSG00000172260:ENSG00000188641:ENSG00000134369:ENSG00000219438:ENSG00000170017:ENSG00000138821                                                                                                                                                 |
| Obesity-GERD genes | DEG.twoside | Adrenal_Gland            | 5012 | 20 | 2.52E-05    | 0.001361527 | ENSG00000078114:ENSG00000171798:ENSG00000182704:ENSG00000134533:ENSG00000123374:ENSG00000139531:ENSG00000118946:ENSG00000102572:ENSG00000131323:ENSG00000130517:ENSG00000105662:ENSG00000084636:ENSG00000184588:ENSG00000134369:ENSG00000182240:ENSG00000197381:ENSG00000219438:ENSG00000170017:ENSG00000138821:ENSG00000002822 |
| Obesity-GERD genes | DEG.twoside | Artery_Aorta             | 4216 | 17 | 0.000121038 | 0.006536054 | ENSG00000134533:ENSG00000118946:ENSG00000152767:ENSG00000140945:ENSG00000084636:ENSG00000116406:ENSG00000134369:ENSG00000163431:ENSG00000182240:ENSG00000197381:ENSG00000219438:ENSG00000145020:ENSG00000170017:ENSG00000138821:ENSG00000154678:ENSG00000147601:ENSG00000160563                                                 |

|                    |             |                                      |      |    |             |             |                                                                                                                                                                                                                                                                                                                                                                                                                                                                                                |
|--------------------|-------------|--------------------------------------|------|----|-------------|-------------|------------------------------------------------------------------------------------------------------------------------------------------------------------------------------------------------------------------------------------------------------------------------------------------------------------------------------------------------------------------------------------------------------------------------------------------------------------------------------------------------|
| Obesity-GERD genes | DEG.twoside | Artery_Coronary                      | 2987 | 14 | 0.000124168 | 0.006705047 | ENSG00000078114:ENSG00000182704:ENSG00000134533:ENSG0000065361:ENSG00000140945:ENSG00000188641:ENSG00000116406:ENSG00000134369:ENSG00000163431:ENSG00000182240:ENSG00000197381:ENSG00000170017:ENSG00000147601:ENSG0000160563                                                                                                                                                                                                                                                                  |
| Obesity-GERD genes | DEG.twoside | Artery_Tibial                        | 4738 | 20 | 1.08E-05    | 0.000580782 | ENSG00000182704:ENSG00000134533:ENSG0000065361:ENSG0000102572:ENSG00000152767:ENSG00000140718:ENSG00000140945:ENSG00000184588:ENSG00000172260:ENSG00000188641:ENSG00000163431:ENSG00000182240:ENSG00000197381:ENSG00000219438:ENSG00000170017:ENSG00000138821:ENSG00000043143:ENSG00000154678:ENSG00000147601:ENSG00000160563                                                                                                                                                                  |
| Obesity-GERD genes | DEG.twoside | Bladder                              | 946  | 3  | 0.181936686 | 1           | ENSG00000182704:ENSG00000163431:ENSG00000147601                                                                                                                                                                                                                                                                                                                                                                                                                                                |
| Obesity-GERD genes | DEG.twoside | Brain_Amygdala                       | 9498 | 30 | 5.71E-06    | 0.000308404 | ENSG00000078114:ENSG00000171798:ENSG00000182704:ENSG00000134533:ENSG00000123374:ENSG00000139531:ENSG00000118946:ENSG00000102572:ENSG00000105662:ENSG00000184588:ENSG00000188641:ENSG00000116406:ENSG00000163431:ENSG00000198700:ENSG00000182240:ENSG00000197381:ENSG00000219438:ENSG00000172995:ENSG00000003756:ENSG00000004534:ENSG00000145020:ENSG00000138821:ENSG00000196782:ENSG00000043143:ENSG0000065060:ENSG00000122687:ENSG00000002822:ENSG00000154678:ENSG00000147601:ENSG00000160563 |
| Obesity-GERD genes | DEG.twoside | Brain_Anterior_cingulate_cortex_BA24 | 9021 | 23 | 0.004779289 | 0.258081586 | ENSG00000078114:ENSG00000171798:ENSG00000182704:ENSG00000123374:ENSG0000065361:ENSG00000118946:ENSG00000102572:ENSG00000133958:ENSG00000105662:ENSG00000172260:ENSG00000188641:ENSG00000116406:ENSG00000163431:ENSG00000182240:ENSG00000197381:ENSG00000219438:ENSG00000119866:ENSG00000172995:ENSG00000145020:ENSG00000138821:ENSG00000043143:ENSG0000065060:ENSG00000002822                                                                                                                  |
| Obesity-GERD genes | DEG.twoside | Brain_Caudate_basal_ganglia          | 9070 | 28 | 2.81E-05    | 0.001518537 | ENSG00000078114:ENSG00000171798:ENSG00000182704:ENSG00000123374:ENSG00000118946:ENSG00000102572:ENSG00000133958:ENSG00000140945:ENSG00000105662:ENSG00000184588:ENSG00000188641:ENSG00000116406:ENSG00000134369:ENSG00000163431:ENSG00000182240:ENSG00000197381:ENSG00000219438:ENSG00000119866:ENSG00000172995:ENSG00000145020:ENSG00000254531:ENSG00000196782:ENSG00000043143:ENSG00000160563                                                                                                |

|                    |             |                             |      |    |             |             |                                                                                                                                                                                                                                                                                                                                                                                                                                |
|--------------------|-------------|-----------------------------|------|----|-------------|-------------|--------------------------------------------------------------------------------------------------------------------------------------------------------------------------------------------------------------------------------------------------------------------------------------------------------------------------------------------------------------------------------------------------------------------------------|
|                    |             |                             |      |    |             |             | 00065060:ENSG00000122687:ENSG00000154678:ENSG00000128573:ENSG00000160563                                                                                                                                                                                                                                                                                                                                                       |
| Obesity-GERD genes | DEG.twoside | Brain_Cerebellar_Hemisphere | 8908 | 26 | 0.000207855 | 0.011224182 | ENSG00000078114:ENSG00000171798:ENSG00000134533:ENSG00000123374:ENSG00000065361:ENSG00000102572:ENSG00000152767:ENSG00000133958:ENSG00000131323:ENSG00000140718:ENSG00000105662:ENSG00000084636:ENSG00000172260:ENSG00000134369:ENSG00000163431:ENSG00000198700:ENSG00000197381:ENSG00000219438:ENSG00000172995:ENSG00000145020:ENSG00000170017:ENSG00000254531:ENSG00000196782:ENSG0000043143:ENSG00000065060:ENSG00000147601 |
| Obesity-GERD genes | DEG.twoside | Brain_Cerebellum            | 8903 | 26 | 0.000205796 | 0.011112989 | ENSG00000078114:ENSG00000171798:ENSG00000182704:ENSG00000134533:ENSG00000123374:ENSG00000065361:ENSG00000102572:ENSG00000152767:ENSG00000133958:ENSG00000131323:ENSG00000140718:ENSG00000105662:ENSG00000172260:ENSG00000134369:ENSG00000163431:ENSG00000198700:ENSG00000197381:ENSG00000219438:ENSG00000172995:ENSG00000145020:ENSG00000170017:ENSG00000138821:ENSG00000196782:ENSG0000043143:ENSG00000065060:ENSG00000147601 |
| Obesity-GERD genes | DEG.twoside | Brain_Cortex                | 8348 | 23 | 0.001606136 | 0.086731322 | ENSG00000078114:ENSG00000171798:ENSG00000182704:ENSG00000123374:ENSG00000102572:ENSG00000133958:ENSG00000131323:ENSG00000105662:ENSG00000184588:ENSG00000172260:ENSG00000188641:ENSG00000116406:ENSG00000163431:ENSG00000182240:ENSG00000197381:ENSG00000219438:ENSG00000119866:ENSG00000172995:ENSG00000145020:ENSG00000138821:ENSG00000196782:ENSG00000065060:ENSG00000154678                                                |
| Obesity-GERD genes | DEG.twoside | Brain_Frontal_Cortex_BA9    | 8147 | 24 | 0.000402655 | 0.021743396 | ENSG00000078114:ENSG00000171798:ENSG00000182704:ENSG00000123374:ENSG00000118946:ENSG00000102572:ENSG00000133958:ENSG00000131323:ENSG00000105662:ENSG00000184588:ENSG00000172260:ENSG00000188641:ENSG00000116406:ENSG00000163431:ENSG00000182240:ENSG00000219438:ENSG00000119866:ENSG00000172995:ENSG00000145020:ENSG00000254531:ENSG00000138821:ENSG00000196782:ENSG00000065060:ENSG00000128573                                |
| Obesity-GERD genes | DEG.twoside | Brain_Hippocampus           | 9458 | 27 | 0.000203586 | 0.010993655 | ENSG00000078114:ENSG00000171798:ENSG00000182704:ENSG00000134533:ENSG00000123374:ENSG00000139531:ENSG00000102572:ENSG00000133958:ENSG00000140945:ENSG00000105662:ENSG00000184588:ENSG00000188641:ENSG00000116406:ENSG00000163431:ENSG00000198700:ENSG00000182240:ENSG00000197381                                                                                                                                                |

|                    |             |                                       |      |    |             |             |                                                                                                                                                                                                                                                                                                                                                                                                                                                                                                                                |
|--------------------|-------------|---------------------------------------|------|----|-------------|-------------|--------------------------------------------------------------------------------------------------------------------------------------------------------------------------------------------------------------------------------------------------------------------------------------------------------------------------------------------------------------------------------------------------------------------------------------------------------------------------------------------------------------------------------|
|                    |             |                                       |      |    |             |             | 381:ENSG00000219438:ENSG00000119866:ENSG00000145020:ENSG00000138821:ENSG00000196782:ENSG00000043143:ENSG0000065060:ENSG00000122687:ENSG00000002822:ENSG00000154678                                                                                                                                                                                                                                                                                                                                                             |
| Obesity-GERD genes | DEG.twoside | Brain_Hypothalamus                    | 8435 | 25 | 0.00024239  | 0.013089047 | ENSG00000078114:ENSG00000171798:ENSG00000182704:ENSG00000134533:ENSG00000123374:ENSG00000139531:ENSG00000118946:ENSG00000102572:ENSG00000133958:ENSG00000184588:ENSG00000188641:ENSG00000116406:ENSG00000163431:ENSG00000182240:ENSG00000197381:ENSG00000219438:ENSG00000145020:ENSG00000170017:ENSG00000138821:ENSG00000196782:ENSG0000065060:ENSG00000122687:ENSG00000002822:ENSG00000154678:ENSG00000160563                                                                                                                 |
| Obesity-GERD genes | DEG.twoside | Brain_Nucleus_accumbens_basal_ganglia | 8860 | 26 | 0.000188838 | 0.010197227 | ENSG00000078114:ENSG00000171798:ENSG00000182704:ENSG00000123374:ENSG00000118946:ENSG00000102572:ENSG00000133958:ENSG00000140945:ENSG00000105662:ENSG00000184588:ENSG00000188641:ENSG00000116406:ENSG00000134369:ENSG00000163431:ENSG00000197381:ENSG00000219438:ENSG00000119866:ENSG00000172995:ENSG00000145020:ENSG00000254531:ENSG00000138821:ENSG00000196782:ENSG0000065060:ENSG00000122687:ENSG00000154678:ENSG00000160563                                                                                                 |
| Obesity-GERD genes | DEG.twoside | Brain_Putamen_basal_ganglia           | 9517 | 32 | 3.46E-07    | 1.87E-05    | ENSG00000078114:ENSG00000171798:ENSG00000182704:ENSG00000123374:ENSG00000139531:ENSG00000118946:ENSG00000102572:ENSG00000133958:ENSG00000131323:ENSG00000140945:ENSG00000105662:ENSG00000172260:ENSG00000188641:ENSG00000116406:ENSG00000134369:ENSG00000163431:ENSG00000198700:ENSG00000182240:ENSG00000197381:ENSG00000219438:ENSG00000119866:ENSG00000172995:ENSG00000003756:ENSG00000004534:ENSG00000145020:ENSG00000138821:ENSG00000043143:ENSG0000065060:ENSG00000122687:ENSG00000154678:ENSG00000147601:ENSG00000160563 |
| Obesity-GERD genes | DEG.twoside | Brain_Spinal_cord_cervical_c-1        | 7307 | 23 | 0.000212194 | 0.011458478 | ENSG00000078114:ENSG00000182704:ENSG00000134533:ENSG00000123374:ENSG00000139531:ENSG0000065361:ENSG00000118946:ENSG00000102572:ENSG00000152767:ENSG00000140945:ENSG00000130517:ENSG00000184588:ENSG00000188641:ENSG00000116406:ENSG00000163431:ENSG00000197381:ENSG00000219438:ENSG00000172995:ENSG00000145020:ENSG00000170017:ENSG00000254531:ENSG00000196782:ENSG00000154678                                                                                                                                                 |

|                    |             |                                   |      |    |             |             |                                                                                                                                                                                                                                                                                                                                                                                                                                                                                |
|--------------------|-------------|-----------------------------------|------|----|-------------|-------------|--------------------------------------------------------------------------------------------------------------------------------------------------------------------------------------------------------------------------------------------------------------------------------------------------------------------------------------------------------------------------------------------------------------------------------------------------------------------------------|
| Obesity-GERD genes | DEG.twoside | Brain_Substantia_nigra            | 8807 | 29 | 4.12E-06    | 0.000222646 | ENSG00000078114:ENSG00000171798:ENSG00000182704:ENSG00000134533:ENSG00000123374:ENSG00000139531:ENSG00000118946:ENSG00000102572:ENSG00000152767:ENSG00000140945:ENSG00000105662:ENSG00000184588:ENSG00000188641:ENSG00000116406:ENSG00000163431:ENSG00000198700:ENSG00000182240:ENSG00000197381:ENSG00000219438:ENSG00000119866:ENSG00000145020:ENSG00000254531:ENSG00000196782:ENSG0000043143:ENSG00000065060:ENSG00000122687:ENSG00000002822:ENSG00000154678:ENSG00000160563 |
| Obesity-GERD genes | DEG.twoside | Breast_Mammary_Tissue             | 2965 | 9  | 0.037202299 | 1           | ENSG00000182704:ENSG00000134533:ENSG00000118946:ENSG00000166126:ENSG00000184588:ENSG00000163431:ENSG00000182240:ENSG00000219438:ENSG00000119866                                                                                                                                                                                                                                                                                                                                |
| Obesity-GERD genes | DEG.twoside | Cells_Cultured_fibroblasts        | 6478 | 19 | 0.002582076 | 0.139432098 | ENSG00000078114:ENSG00000123374:ENSG00000131323:ENSG00000140718:ENSG00000140945:ENSG00000084636:ENSG00000172260:ENSG00000188641:ENSG00000116406:ENSG00000134369:ENSG00000163431:ENSG00000198700:ENSG00000197381:ENSG00000219438:ENSG00000145020:ENSG00000170017:ENSG00000138821:ENSG00000196782:ENSG00000122687                                                                                                                                                                |
| Obesity-GERD genes | DEG.twoside | Cells_EBV-transformed_lymphocytes | 7452 | 19 | 0.012722137 | 0.686995411 | ENSG00000123374:ENSG00000102572:ENSG00000152767:ENSG00000131323:ENSG00000130517:ENSG00000105662:ENSG00000084636:ENSG00000188641:ENSG00000198700:ENSG00000182240:ENSG00000119866:ENSG00000145020:ENSG00000170017:ENSG00000254531:ENSG00000138821:ENSG00000043143:ENSG00000065060:ENSG00000122687:ENSG00000002822                                                                                                                                                                |
| Obesity-GERD genes | DEG.twoside | Cervix_Ectocervix                 | 195  | 1  | 0.262581235 | 1           | ENSG00000182704                                                                                                                                                                                                                                                                                                                                                                                                                                                                |
| Obesity-GERD genes | DEG.twoside | Cervix_Endocervix                 | 1834 | 9  | 0.001852669 | 0.100044139 | ENSG00000182704:ENSG00000123374:ENSG00000139531:ENSG00000084636:ENSG00000188641:ENSG00000163431:ENSG00000198700:ENSG00000219438:ENSG00000147601                                                                                                                                                                                                                                                                                                                                |
| Obesity-GERD genes | DEG.twoside | Colon_Sigmoid                     | 3313 | 12 | 0.004003092 | 0.216166988 | ENSG00000182704:ENSG00000134533:ENSG00000152767:ENSG00000140945:ENSG00000184588:ENSG00000172260:ENSG00000163431:ENSG00000197381:ENSG00000119866:ENSG00000145020:ENSG00000138821:ENSG00000128573                                                                                                                                                                                                                                                                                |
| Obesity-GERD genes | DEG.twoside | Colon_Transverse                  | 3185 | 9  | 0.054668064 | 1           | ENSG00000078114:ENSG00000065361:ENSG00000118946:ENSG00000166126:ENSG00000140945:ENSG00000130517:ENSG00000184588:ENSG00000154678:ENSG00000128573                                                                                                                                                                                                                                                                                                                                |

|                    |             |                                     |      |    |             |             |                                                                                                                                                                                                                                                                                                                                                                                                                                                                                                                                 |
|--------------------|-------------|-------------------------------------|------|----|-------------|-------------|---------------------------------------------------------------------------------------------------------------------------------------------------------------------------------------------------------------------------------------------------------------------------------------------------------------------------------------------------------------------------------------------------------------------------------------------------------------------------------------------------------------------------------|
| Obesity-GERD genes | DEG.twoside | Esophagus_Gastroesophageal Junction | 2845 | 10 | 0.011000803 | 0.594043337 | ENSG00000123374:ENSG00000140945:ENSG00000184588:ENSG00000172260:ENSG00000163431:ENSG00000197381:ENSG00000119866:ENSG00000138821:ENSG00000154678:ENSG00000128573                                                                                                                                                                                                                                                                                                                                                                 |
| Obesity-GERD genes | DEG.twoside | Esophagus_Mucosa                    | 5811 | 24 | 1.07E-06    | 5.79E-05    | ENSG00000182704:ENSG00000134533:ENSG00000065361:ENSG00000118946:ENSG00000102572:ENSG00000152767:ENSG00000166126:ENSG00000140718:ENSG00000140945:ENSG00000130517:ENSG00000105662:ENSG00000084636:ENSG00000184588:ENSG00000172260:ENSG00000197381:ENSG00000219438:ENSG00000119866:ENSG00000145020:ENSG00000170017:ENSG00000254531:ENSG00000138821:ENSG00000043143:ENSG00000154678:ENSG00000147601                                                                                                                                 |
| Obesity-GERD genes | DEG.twoside | Esophagus_Muscularis                | 3072 | 11 | 0.006559352 | 0.354205018 | ENSG00000123374:ENSG00000140945:ENSG00000184588:ENSG00000172260:ENSG00000163431:ENSG00000197381:ENSG00000219438:ENSG00000119866:ENSG00000138821:ENSG00000154678:ENSG00000128573                                                                                                                                                                                                                                                                                                                                                 |
| Obesity-GERD genes | DEG.twoside | Fallopian_Tube                      | 486  | 5  | 0.000931683 | 0.050310883 | ENSG000000078114:ENSG00000182704:ENSG00000134533:ENSG00000163431:ENSG00000145020                                                                                                                                                                                                                                                                                                                                                                                                                                                |
| Obesity-GERD genes | DEG.twoside | Heart_Atrial_Appendage              | 9152 | 26 | 0.00033422  | 0.018047868 | ENSG00000078114:ENSG00000134533:ENSG00000123374:ENSG00000065361:ENSG00000118946:ENSG00000102572:ENSG00000152767:ENSG00000131323:ENSG00000140718:ENSG00000130517:ENSG00000105662:ENSG00000188641:ENSG00000116406:ENSG00000198700:ENSG00000197381:ENSG00000219438:ENSG00000170017:ENSG00000254531:ENSG00000138821:ENSG00000196782:ENSG00000043143:ENSG00000122687:ENSG00000002822:ENSG00000154678:ENSG00000147601:ENSG00000160563                                                                                                 |
| Obesity-GERD genes | DEG.twoside | Heart_Left_Ventricle                | 9979 | 32 | 1.14E-06    | 6.13E-05    | ENSG00000078114:ENSG00000182704:ENSG00000134533:ENSG00000123374:ENSG00000118946:ENSG00000102572:ENSG00000152767:ENSG00000131323:ENSG00000140718:ENSG00000130517:ENSG00000105662:ENSG00000084636:ENSG00000184588:ENSG00000172260:ENSG00000188641:ENSG00000116406:ENSG00000163431:ENSG00000198700:ENSG00000182240:ENSG00000197381:ENSG00000119866:ENSG00000003756:ENSG00000145020:ENSG00000170017:ENSG00000254531:ENSG00000138821:ENSG00000043143:ENSG00000122687:ENSG00000002822:ENSG00000154678:ENSG00000147601:ENSG00000160563 |

|                    |             |                      |      |    |             |             |                                                                                                                                                                                                                                                                                                                                                                                                                               |
|--------------------|-------------|----------------------|------|----|-------------|-------------|-------------------------------------------------------------------------------------------------------------------------------------------------------------------------------------------------------------------------------------------------------------------------------------------------------------------------------------------------------------------------------------------------------------------------------|
| Obesity-GERD genes | DEG.twoside | Kidney_Cortex        | 6871 | 23 | 7.88E-05    | 0.004252542 | ENSG00000123374:ENSG00000152767:ENSG00000166126:ENSG00000140718:ENSG00000140945:ENSG00000130517:ENSG00000084636:ENSG00000184588:ENSG00000172260:ENSG00000188641:ENSG00000116406:ENSG00000134369:ENSG00000163431:ENSG00000198700:ENSG00000197381:ENSG00000219438:ENSG00000170017:ENSG00000254531:ENSG00000138821:ENSG00000196782:ENSG00000065060:ENSG0000002822:ENSG00000160563                                                |
| Obesity-GERD genes | DEG.twoside | Kidney_Medulla       | 95   | 0  | 1           | 1           |                                                                                                                                                                                                                                                                                                                                                                                                                               |
| Obesity-GERD genes | DEG.twoside | Liver                | 9510 | 26 | 0.000646434 | 0.034907445 | ENSG00000182704:ENSG00000123374:ENSG00000139531:ENSG00000065361:ENSG00000111540:ENSG00000102572:ENSG00000131323:ENSG00000166126:ENSG00000140718:ENSG00000105662:ENSG00000084636:ENSG00000184588:ENSG00000163431:ENSG00000198700:ENSG00000182240:ENSG00000197381:ENSG00000219438:ENSG0000003756:ENSG00000254531:ENSG00000196782:ENSG00000043143:ENSG00000065060:ENSG00000122687:ENSG0000002822:ENSG00000147601:ENSG00000160563 |
| Obesity-GERD genes | DEG.twoside | Lung                 | 5100 | 14 | 0.020359856 | 1           | ENSG00000078114:ENSG00000123374:ENSG00000118946:ENSG00000152767:ENSG00000166126:ENSG00000140945:ENSG00000184588:ENSG00000188641:ENSG00000116406:ENSG00000197381:ENSG00000219438:ENSG00000170017:ENSG00000138821:ENSG00000128573                                                                                                                                                                                               |
| Obesity-GERD genes | DEG.twoside | Minor_Salivary_Gland | 3752 | 14 | 0.001291316 | 0.069731081 | ENSG00000078114:ENSG00000065361:ENSG00000118946:ENSG00000152767:ENSG00000140945:ENSG00000105662:ENSG00000172260:ENSG00000116406:ENSG00000134369:ENSG00000182240:ENSG00000197381:ENSG00000172995:ENSG00000170017:ENSG00000138821                                                                                                                                                                                               |
| Obesity-GERD genes | DEG.twoside | Muscle_Skeletal      | 7979 | 24 | 0.000287503 | 0.015525142 | ENSG00000182704:ENSG00000134533:ENSG00000123374:ENSG00000065361:ENSG00000102572:ENSG00000152767:ENSG00000131323:ENSG00000105662:ENSG00000084636:ENSG00000172260:ENSG00000188641:ENSG00000134369:ENSG00000198700:ENSG00000182240:ENSG00000197381:ENSG00000172995:ENSG00000004534:ENSG00000145020:ENSG00000254531:ENSG00000043143:ENSG00000065060:ENSG00000128573:ENSG00000147601:ENSG00000160563                               |

|                    |             |                                 |       |    |             |             |                                                                                                                                                                                                                                                                                                                                                                                                                                                                |
|--------------------|-------------|---------------------------------|-------|----|-------------|-------------|----------------------------------------------------------------------------------------------------------------------------------------------------------------------------------------------------------------------------------------------------------------------------------------------------------------------------------------------------------------------------------------------------------------------------------------------------------------|
| Obesity-GERD genes | DEG.twoside | Nerve_Tibial                    | 6774  | 13 | 0.241609978 | 1           | ENSG00000182704:ENSG00000065361:ENSG00000140945:ENSG0000084636:ENSG00000172260:ENSG00000188641:ENSG00000163431:ENSG00000182240:ENSG00000219438:ENSG00000145020:ENSG00000043143:ENSG00000154678:ENSG00000147601                                                                                                                                                                                                                                                 |
| Obesity-GERD genes | DEG.twoside | Ovary                           | 7195  | 23 | 0.000165959 | 0.008961801 | ENSG00000078114:ENSG00000171798:ENSG00000182704:ENSG00000134533:ENSG00000123374:ENSG00000139531:ENSG00000065361:ENSG00000118946:ENSG00000140945:ENSG00000130517:ENSG00000084636:ENSG00000184588:ENSG00000172260:ENSG00000188641:ENSG00000134369:ENSG00000197381:ENSG00000145020:ENSG00000170017:ENSG00000254531:ENSG00000196782:ENSG00000043143:ENSG00000128573:ENSG00000147601                                                                                |
| Obesity-GERD genes | DEG.twoside | Pancreas                        | 10331 | 28 | 0.000355354 | 0.019189133 | ENSG00000078114:ENSG00000182704:ENSG00000134533:ENSG00000123374:ENSG00000139531:ENSG00000111540:ENSG00000118946:ENSG00000102572:ENSG00000131323:ENSG00000140718:ENSG00000105662:ENSG00000084636:ENSG00000188641:ENSG00000134369:ENSG00000163431:ENSG00000198700:ENSG00000197381:ENSG00000219438:ENSG00000119866:ENSG00000254531:ENSG00000138821:ENSG00000196782:ENSG00000043143:ENSG00000122687:ENSG0000002822:ENSG00000128573:ENSG00000147601:ENSG00000160563 |
| Obesity-GERD genes | DEG.twoside | Pituitary                       | 7083  | 23 | 0.00012902  | 0.00696708  | ENSG00000078114:ENSG00000171798:ENSG00000134533:ENSG00000123374:ENSG00000065361:ENSG00000118946:ENSG00000102572:ENSG00000152767:ENSG00000133958:ENSG00000131323:ENSG00000130517:ENSG00000105662:ENSG00000184588:ENSG00000172260:ENSG00000116406:ENSG00000134369:ENSG00000163431:ENSG00000182240:ENSG00000197381:ENSG00000119866:ENSG00000145020:ENSG00000196782:ENSG00000154678                                                                                |
| Obesity-GERD genes | DEG.twoside | Prostate                        | 4048  | 12 | 0.018889029 | 1           | ENSG00000182704:ENSG00000139531:ENSG00000065361:ENSG00000152767:ENSG00000140945:ENSG00000130517:ENSG00000084636:ENSG00000172260:ENSG00000163431:ENSG00000182240:ENSG00000145020:ENSG00000254531                                                                                                                                                                                                                                                                |
| Obesity-GERD genes | DEG.twoside | Skin_Not_Sun_Exposed_Suprapubic | 5432  | 17 | 0.002415032 | 0.13041173  | ENSG00000182704:ENSG00000134533:ENSG00000123374:ENSG00000139531:ENSG00000065361:ENSG00000102572:ENSG0000016126:ENSG00000130517:ENSG00000105662:ENSG00000184588:ENSG00000172260:ENSG00000188641:ENSG00000116406:ENSG00000134369:ENSG00000219438:ENSG00000119866:ENSG00000196782                                                                                                                                                                                 |

|                    |             |                                |       |    |             |             |                                                                                                                                                                                                                                                                                                                                                                 |
|--------------------|-------------|--------------------------------|-------|----|-------------|-------------|-----------------------------------------------------------------------------------------------------------------------------------------------------------------------------------------------------------------------------------------------------------------------------------------------------------------------------------------------------------------|
| Obesity-GERD genes | DEG.twoside | Skin_Sun_Exposed_Lower_Lege    | 5275  | 15 | 0.011690636 | 0.631294334 | ENSG00000182704:ENSG00000123374:ENSG00000139531:ENSG0000065361:ENSG00000102572:ENSG00000166126:ENSG00000140945:ENSG00000130517:ENSG00000105662:ENSG00000188641:ENSG00000116406:ENSG00000219438:ENSG00000119866:ENSG00000196782:ENSG00000002822                                                                                                                  |
| Obesity-GERD genes | DEG.twoside | Small_Intestine_Terminal_Ileum | 4120  | 12 | 0.021455192 | 1           | ENSG00000078114:ENSG00000065361:ENSG00000118946:ENSG00000131323:ENSG00000166126:ENSG00000140718:ENSG00000140945:ENSG00000130517:ENSG00000172260:ENSG00000134369:ENSG00000219438:ENSG00000119866                                                                                                                                                                 |
| Obesity-GERD genes | DEG.twoside | Spleen                         | 6309  | 15 | 0.051775952 | 1           | ENSG00000182704:ENSG00000118946:ENSG00000152767:ENSG00000131323:ENSG00000166126:ENSG00000140718:ENSG00000140945:ENSG00000130517:ENSG00000084636:ENSG00000184588:ENSG00000134369:ENSG00000119866:ENSG00000170017:ENSG0000043143:ENSG00000002822                                                                                                                  |
| Obesity-GERD genes | DEG.twoside | Stomach                        | 3709  | 13 | 0.003527941 | 0.190508818 | ENSG00000078114:ENSG00000065361:ENSG00000118946:ENSG00000131323:ENSG00000166126:ENSG00000140718:ENSG00000140945:ENSG00000184588:ENSG00000134369:ENSG00000182240:ENSG00000219438:ENSG00000138821:ENSG00000002822                                                                                                                                                 |
| Obesity-GERD genes | DEG.twoside | Testis                         | 15238 | 22 | 0.738002892 | 1           | ENSG00000078114:ENSG00000065361:ENSG00000118946:ENSG00000133958:ENSG00000187581:ENSG00000131323:ENSG00000140718:ENSG00000140945:ENSG00000130517:ENSG00000184588:ENSG00000172260:ENSG00000188641:ENSG00000182240:ENSG00000197381:ENSG00000219438:ENSG00000119866:ENSG00000170017:ENSG00000138821:ENSG00000043143:ENSG00000065060:ENSG00000002822:ENSG00000160563 |
| Obesity-GERD genes | DEG.twoside | Thyroid                        | 6725  | 18 | 0.00965047  | 0.521125404 | ENSG00000078114:ENSG00000182704:ENSG00000134533:ENSG00000139531:ENSG00000152767:ENSG00000140945:ENSG00000105662:ENSG00000084636:ENSG00000172260:ENSG00000198700:ENSG00000197381:ENSG00000219438:ENSG00000119866:ENSG00000145020:ENSG00000170017:ENSG00000065060:ENSG00000154678:ENSG00000128573                                                                 |
| Obesity-GERD genes | DEG.twoside | Uterus                         | 6387  | 17 | 0.013062645 | 0.705382839 | ENSG00000182704:ENSG00000134533:ENSG00000123374:ENSG00000139531:ENSG00000065361:ENSG00000140945:ENSG00000184588:ENSG00000163431:ENSG00000198700:ENSG00000182240:ENSG00000197381:ENSG00000145020:ENSG00000196782:ENSG0000043143:ENSG00000128573:ENSG00000147601:ENSG00000160563                                                                                  |

|                        |             |                                      |      |    |             |             |                                                                                                                                                                                                                                                                                                                 |
|------------------------|-------------|--------------------------------------|------|----|-------------|-------------|-----------------------------------------------------------------------------------------------------------------------------------------------------------------------------------------------------------------------------------------------------------------------------------------------------------------|
| Obesity-GERD genes     | DEG.twoside | Vagina                               | 3487 | 12 | 0.006052797 | 0.326851044 | ENSG00000182704:ENSG00000134533:ENSG00000065361:ENSG00000102572:ENSG00000166126:ENSG00000140945:ENSG00000184588:ENSG00000188641:ENSG00000119866:ENSG00000170017:ENSG00000196782:ENSG00000154678                                                                                                                 |
| Obesity-GERD genes     | DEG.twoside | Whole_Blood                          | 8941 | 19 | 0.074802744 | 1           | ENSG00000123374:ENSG00000139531:ENSG00000102572:ENSG00000131323:ENSG00000105662:ENSG00000188641:ENSG00000116406:ENSG00000198700:ENSG00000197381:ENSG00000119866:ENSG00000004534:ENSG00000145020:ENSG00000170017:ENSG00000254531:ENSG00000138821:ENSG00000065060:ENSG00000122687:ENSG00000147601:ENSG00000160563 |
| Neuropsych-driven GERD | DEG.up      | Adipose_Subcutaneous                 | 2107 | 2  | 0.668989187 | 1           | ENSG00000196628:ENSG00000052795                                                                                                                                                                                                                                                                                 |
| Neuropsych-driven GERD | DEG.up      | Adipose_Visceral_Omentum             | 1764 | 2  | 0.570127707 | 1           | ENSG00000196628:ENSG00000111801                                                                                                                                                                                                                                                                                 |
| Neuropsych-driven GERD | DEG.up      | Adrenal_Gland                        | 1540 | 2  | 0.49558163  | 1           | ENSG00000111801:ENSG00000106460                                                                                                                                                                                                                                                                                 |
| Neuropsych-driven GERD | DEG.up      | Artery_Aorta                         | 2756 | 5  | 0.167557212 | 1           | ENSG00000187676:ENSG00000178568:ENSG00000052795:ENSG00000112763:ENSG00000010818                                                                                                                                                                                                                                 |
| Neuropsych-driven GERD | DEG.up      | Artery_Coronary                      | 2038 | 2  | 0.65061044  | 1           | ENSG00000052795:ENSG00000112763                                                                                                                                                                                                                                                                                 |
| Neuropsych-driven GERD | DEG.up      | Artery_Tibial                        | 2711 | 5  | 0.159613725 | 1           | ENSG00000187676:ENSG00000119718:ENSG00000052795:ENSG00000112763:ENSG00000010818                                                                                                                                                                                                                                 |
| Neuropsych-driven GERD | DEG.up      | Bladder                              | 842  | 0  | 1           | 1           |                                                                                                                                                                                                                                                                                                                 |
| Neuropsych-driven GERD | DEG.up      | Brain_Amygdala                       | 1820 | 6  | 0.011718217 | 0.632783717 | ENSG00000156395:ENSG00000184226:ENSG00000103449:ENSG00000101489:ENSG00000178568:ENSG00000107105                                                                                                                                                                                                                 |
| Neuropsych-driven GERD | DEG.up      | Brain_Anterior_cingulate_cortex_BA24 | 2370 | 8  | 0.002920748 | 0.157720398 | ENSG00000156395:ENSG00000184226:ENSG00000103449:ENSG00000101489:ENSG00000178342:ENSG00000116329:ENSG00000178568:ENSG00000107105                                                                                                                                                                                 |

|                        |        |                                       |      |    |             |             |                                                                                                                                                                                                                |
|------------------------|--------|---------------------------------------|------|----|-------------|-------------|----------------------------------------------------------------------------------------------------------------------------------------------------------------------------------------------------------------|
| Neuropsych-driven GERD | DEG.up | Brain_Caudate_basal_ganglia           | 2212 | 10 | 7.04E-05    | 0.003802251 | ENSG00000156395:ENSG00000187676:ENSG00000184226:ENSG00000103449:ENSG00000101489:ENSG00000187323:ENSG00000116329:ENSG00000178568:ENSG00000188981:ENSG00000107105                                                |
| Neuropsych-driven GERD | DEG.up | Brain_Cerebellar_Hemisphere           | 6301 | 13 | 0.009759315 | 0.527003027 | ENSG00000156395:ENSG00000184226:ENSG00000101489:ENSG00000196628:ENSG00000178568:ENSG00000151276:ENSG00000125388:ENSG00000197386:ENSG00000112763:ENSG00000124508:ENSG0000010818:ENSG00000106460:ENSG00000107105 |
| Neuropsych-driven GERD | DEG.up | Brain_Cerebellum                      | 6164 | 12 | 0.02137501  | 1           | ENSG00000156395:ENSG00000184226:ENSG00000101489:ENSG00000196628:ENSG00000178568:ENSG00000151276:ENSG00000125388:ENSG00000197386:ENSG00000112763:ENSG00000124508:ENSG0000010818:ENSG00000107105                 |
| Neuropsych-driven GERD | DEG.up | Brain_Cortex                          | 2792 | 9  | 0.002081329 | 0.112391749 | ENSG00000156395:ENSG00000184226:ENSG00000103449:ENSG00000101489:ENSG00000187323:ENSG00000116329:ENSG00000178568:ENSG00000109756:ENSG00000107105                                                                |
| Neuropsych-driven GERD | DEG.up | Brain_Frontal_Cortex_BA9              | 3132 | 10 | 0.001180893 | 0.063768231 | ENSG00000156395:ENSG00000184226:ENSG00000103449:ENSG00000101489:ENSG00000187323:ENSG00000116329:ENSG00000178568:ENSG00000109756:ENSG0000010818:ENSG00000107105                                                 |
| Neuropsych-driven GERD | DEG.up | Brain_Hippocampus                     | 1965 | 8  | 0.000881645 | 0.047608835 | ENSG00000156395:ENSG00000184226:ENSG00000103449:ENSG00000101489:ENSG00000187323:ENSG00000178342:ENSG00000178568:ENSG00000107105                                                                                |
| Neuropsych-driven GERD | DEG.up | Brain_Hypothalamus                    | 2531 | 8  | 0.004380059 | 0.236523204 | ENSG00000156395:ENSG00000184226:ENSG00000103449:ENSG00000101489:ENSG00000187323:ENSG00000178568:ENSG00000188981:ENSG00000107105                                                                                |
| Neuropsych-driven GERD | DEG.up | Brain_Nucleus_accumbens_basal_ganglia | 2451 | 10 | 0.00016586  | 0.008956455 | ENSG00000156395:ENSG00000187676:ENSG00000184226:ENSG00000103449:ENSG00000101489:ENSG00000187323:ENSG00000178342:ENSG00000116329:ENSG00000178568:ENSG00000188981                                                |
| Neuropsych-driven GERD | DEG.up | Brain_Putamen_basal_ganglia           | 1741 | 8  | 0.000394984 | 0.021329154 | ENSG00000156395:ENSG00000187676:ENSG00000184226:ENSG00000103449:ENSG00000101489:ENSG00000187323:ENSG00000116329:ENSG00000178568                                                                                |
| Neuropsych-driven GERD | DEG.up | Brain_Spinal_cord_cervical_c-1        | 2224 | 2  | 0.698443151 | 1           | ENSG00000184226:ENSG00000103449                                                                                                                                                                                |
| Neuropsych-driven GERD | DEG.up | Brain_Substantia_nigra                | 1645 | 6  | 0.007295239 | 0.393942893 | ENSG00000184226:ENSG00000103449:ENSG00000101489:ENSG00000187323:ENSG00000178568:ENSG00000107105                                                                                                                |
| Neuropsych-driven GERD | DEG.up | Breast_Mammary_Tissue                 | 1964 | 3  | 0.35142837  | 1           | ENSG00000196628:ENSG00000151276:ENSG00000091831                                                                                                                                                                |

|                        |        |                                     |      |   |             |   |                                                                                                                |
|------------------------|--------|-------------------------------------|------|---|-------------|---|----------------------------------------------------------------------------------------------------------------|
| Neuropsych-driven GERD | DEG.up | Cells_Culture_d_fibroblasts         | 4335 | 6 | 0.31530665  | 1 | ENSG00000187676:ENSG00000119596:ENSG00000119718:ENSG0000198492:ENSG00000130766:ENSG00000106460                 |
| Neuropsych-driven GERD | DEG.up | Cells_EBV-transformed_lymphocytes   | 5069 | 7 | 0.292815955 | 1 | ENSG00000119596:ENSG00000198492:ENSG00000130766:ENSG0000197386:ENSG00000109756:ENSG00000124508:ENSG00000111801 |
| Neuropsych-driven GERD | DEG.up | Cervix_Ectocervix                   | 193  | 1 | 0.187148532 | 1 | ENSG00000091831                                                                                                |
| Neuropsych-driven GERD | DEG.up | Cervix_Endocervix                   | 1829 | 5 | 0.043346812 | 1 | ENSG00000119596:ENSG00000103449:ENSG00000112763:ENSG0000111801:ENSG00000091831                                 |
| Neuropsych-driven GERD | DEG.up | Colon_Sigmoid                       | 1637 | 0 | 1           | 1 |                                                                                                                |
| Neuropsych-driven GERD | DEG.up | Colon_Transverse                    | 1602 | 0 | 1           | 1 |                                                                                                                |
| Neuropsych-driven GERD | DEG.up | Esophagus_Gastroesophageal_Junction | 1287 | 1 | 0.755118355 | 1 | ENSG00000184226                                                                                                |
| Neuropsych-driven GERD | DEG.up | Esophagus_Mucosa                    | 2231 | 1 | 0.916131942 | 1 | ENSG00000130766                                                                                                |
| Neuropsych-driven GERD | DEG.up | Esophagus_Muscularis                | 1311 | 2 | 0.412053695 | 1 | ENSG00000184226:ENSG00000052795                                                                                |
| Neuropsych-driven GERD | DEG.up | Fallopian_Tube                      | 485  | 2 | 0.09468237  | 1 | ENSG00000112763:ENSG00000091831                                                                                |
| Neuropsych-driven GERD | DEG.up | Heart_Atrial_Appendage              | 743  | 1 | 0.552881333 | 1 | ENSG00000187676                                                                                                |
| Neuropsych-driven GERD | DEG.up | Heart_Left_Ventricle                | 536  | 0 | 1           | 1 |                                                                                                                |

|                           |        |                                 |      |    |             |   |                                                                                                                                                                                |
|---------------------------|--------|---------------------------------|------|----|-------------|---|--------------------------------------------------------------------------------------------------------------------------------------------------------------------------------|
| Neuropsych-driven<br>GERD | DEG.up | Kidney_Cortex                   | 1327 | 1  | 0.765824659 | 1 | ENSG00000103449                                                                                                                                                                |
| Neuropsych-driven<br>GERD | DEG.up | Kidney_Medulla                  | 95   | 0  | 1           | 1 |                                                                                                                                                                                |
| Neuropsych-driven<br>GERD | DEG.up | Liver                           | 1525 | 1  | 0.812480122 | 1 | ENSG00000103449                                                                                                                                                                |
| Neuropsych-driven<br>GERD | DEG.up | Lung                            | 4195 | 6  | 0.287883486 | 1 | ENSG00000196628:ENSG00000109756:ENSG00000052795:ENSG00000112763:ENSG00000124508:ENSG00000111801                                                                                |
| Neuropsych-driven<br>GERD | DEG.up | Minor_Salivary_Gland            | 1891 | 0  | 1           | 1 |                                                                                                                                                                                |
| Neuropsych-driven<br>GERD | DEG.up | Muscle_Skeletal                 | 1143 | 0  | 1           | 1 |                                                                                                                                                                                |
| Neuropsych-driven<br>GERD | DEG.up | Nerve_Tibial                    | 5869 | 10 | 0.081536687 | 1 | ENSG00000156395:ENSG00000184226:ENSG00000119596:ENSG00000151276:ENSG00000125388:ENSG00000197386:ENSG00000109756:ENSG00000052795:ENSG00000164123:ENSG00000106460                |
| Neuropsych-driven<br>GERD | DEG.up | Ovary                           | 5674 | 11 | 0.02931244  | 1 | ENSG00000156395:ENSG00000149292:ENSG00000119596:ENSG00000119608:ENSG00000103449:ENSG00000196628:ENSG00000130766:ENSG00000124508:ENSG00000111801:ENSG0000010818:ENSG00000091831 |
| Neuropsych-driven<br>GERD | DEG.up | Pancreas                        | 745  | 0  | 1           | 1 |                                                                                                                                                                                |
| Neuropsych-driven<br>GERD | DEG.up | Pituitary                       | 5156 | 9  | 0.087131425 | 1 | ENSG00000156395:ENSG00000149292:ENSG00000170209:ENSG00000103449:ENSG00000101489:ENSG00000178568:ENSG00000125388:ENSG00000111801:ENSG00000091831                                |
| Neuropsych-driven<br>GERD | DEG.up | Prostate                        | 3306 | 3  | 0.701802653 | 1 | ENSG00000149292:ENSG00000170209:ENSG00000091831                                                                                                                                |
| Neuropsych-driven<br>GERD | DEG.up | Skin_Not_Sun_Exposed_Suprapubic | 2741 | 2  | 0.804462648 | 1 | ENSG00000170209:ENSG00000198492                                                                                                                                                |

|                        |          |                                |       |    |             |   |                                                                                                                                                                                                                 |
|------------------------|----------|--------------------------------|-------|----|-------------|---|-----------------------------------------------------------------------------------------------------------------------------------------------------------------------------------------------------------------|
| Neuropsych-driven GERD | DEG.up   | Skin_Sun_Exposed_Lower_Lege    | 2801  | 2  | 0.814435273 | 1 | ENSG00000170209:ENSG00000198492                                                                                                                                                                                 |
| Neuropsych-driven GERD | DEG.up   | Small_Intestine_Terminal_Ileum | 2738  | 2  | 0.80395227  | 1 | ENSG00000124508:ENSG00000111801                                                                                                                                                                                 |
| Neuropsych-driven GERD | DEG.up   | Spleen                         | 4240  | 4  | 0.682764355 | 1 | ENSG00000151276:ENSG00000112763:ENSG00000124508:ENSG00000111801                                                                                                                                                 |
| Neuropsych-driven GERD | DEG.up   | Stomach                        | 1102  | 0  | 1           | 1 |                                                                                                                                                                                                                 |
| Neuropsych-driven GERD | DEG.up   | Testis                         | 12326 | 13 | 0.591576673 | 1 | ENSG00000149292:ENSG00000170209:ENSG00000119596:ENSG00000119718:ENSG00000187323:ENSG00000178342:ENSG00000130766:ENSG00000178568:ENSG00000151276:ENSG00000125388:ENSG00000188981:ENSG00000164123:ENSG00000107105 |
| Neuropsych-driven GERD | DEG.up   | Thyroid                        | 5687  | 7  | 0.407958179 | 1 | ENSG00000149292:ENSG00000119608:ENSG00000119718:ENSG00000103449:ENSG00000151276:ENSG00000109756:ENSG00000111801                                                                                                 |
| Neuropsych-driven GERD | DEG.up   | Uterus                         | 5544  | 9  | 0.124077702 | 1 | ENSG00000187676:ENSG00000119596:ENSG00000103449:ENSG00000196628:ENSG00000112763:ENSG00000124508:ENSG00000111801:ENSG00000091831:ENSG00000106460                                                                 |
| Neuropsych-driven GERD | DEG.up   | Vagina                         | 2840  | 4  | 0.361505876 | 1 | ENSG00000170209:ENSG00000103449:ENSG00000111801:ENSG00000091831                                                                                                                                                 |
| Neuropsych-driven GERD | DEG.up   | Whole_Blood                    | 2033  | 1  | 0.894691368 | 1 | ENSG00000178342                                                                                                                                                                                                 |
| Neuropsych-driven GERD | DEG.down | Adipose_Subcutaneous           | 1527  | 0  | 1           | 1 |                                                                                                                                                                                                                 |
| Neuropsych-driven GERD | DEG.down | Adipose_Visceral_Omentum       | 1650  | 1  | 0.837147952 | 1 | ENSG00000149292                                                                                                                                                                                                 |
| Neuropsych-driven GERD | DEG.down | Adrenal_Gland                  | 3472  | 5  | 0.311786377 | 1 | ENSG00000187676:ENSG00000101489:ENSG00000151276:ENSG00000109756:ENSG00000052795                                                                                                                                 |

|                           |          |                                      |      |    |             |   |                                                                                                                                                                                |
|---------------------------|----------|--------------------------------------|------|----|-------------|---|--------------------------------------------------------------------------------------------------------------------------------------------------------------------------------|
| Neuropsych-driven<br>GERD | DEG.down | Artery_Aorta                         | 1460 | 0  | 1           | 1 |                                                                                                                                                                                |
| Neuropsych-driven<br>GERD | DEG.down | Artery_Coronary                      | 949  | 0  | 1           | 1 |                                                                                                                                                                                |
| Neuropsych-driven<br>GERD | DEG.down | Artery_Tibial                        | 2027 | 0  | 1           | 1 |                                                                                                                                                                                |
| Neuropsych-driven<br>GERD | DEG.down | Bladder                              | 104  | 0  | 1           | 1 |                                                                                                                                                                                |
| Neuropsych-driven<br>GERD | DEG.down | Brain_Amygdala                       | 7678 | 11 | 0.176887179 | 1 | ENSG00000149292:ENSG00000119596:ENSG00000119718:ENSG0000198492:ENSG00000130766:ENSG00000151276:ENSG00000052795:ENSG00000182952:ENSG00000112763:ENSG00000124508:ENSG00000111801 |
| Neuropsych-driven<br>GERD | DEG.down | Brain_Anterior_cingulate_cortex_BA24 | 6651 | 9  | 0.270072226 | 1 | ENSG00000149292:ENSG00000119596:ENSG00000119718:ENSG0000198492:ENSG00000130766:ENSG00000182952:ENSG00000112763:ENSG00000124508:ENSG00000111801                                 |
| Neuropsych-driven<br>GERD | DEG.down | Brain_Caudate_basal_ganglia          | 6858 | 11 | 0.096151687 | 1 | ENSG00000149292:ENSG00000119596:ENSG00000119718:ENSG0000198492:ENSG00000130766:ENSG00000151276:ENSG00000052795:ENSG00000182952:ENSG00000112763:ENSG00000124508:ENSG00000111801 |
| Neuropsych-driven<br>GERD | DEG.down | Brain_Cerebellar_Hemisphere          | 2607 | 3  | 0.536281929 | 1 | ENSG00000149292:ENSG00000187676:ENSG00000103449                                                                                                                                |
| Neuropsych-driven<br>GERD | DEG.down | Brain_Cerebellum                     | 2739 | 3  | 0.570963044 | 1 | ENSG00000149292:ENSG00000187676:ENSG00000103449                                                                                                                                |
| Neuropsych-driven<br>GERD | DEG.down | Brain_Cortex                         | 5556 | 7  | 0.383067996 | 1 | ENSG00000149292:ENSG00000198492:ENSG00000052795:ENSG0000182952:ENSG00000112763:ENSG00000124508:ENSG00000111801                                                                 |
| Neuropsych-driven<br>GERD | DEG.down | Brain_Frontal_Cortex_BA9             | 5015 | 4  | 0.807442347 | 1 | ENSG00000149292:ENSG00000112763:ENSG00000124508:ENSG00000111801                                                                                                                |
| Neuropsych-driven<br>GERD | DEG.down | Brain_Hippocampus                    | 7493 | 11 | 0.156137224 | 1 | ENSG00000149292:ENSG00000187676:ENSG00000119596:ENSG0000119718:ENSG00000198492:ENSG00000130766:ENSG0000015                                                                     |

|                        |          |                                       |      |    |             |             |                                                                                                                                                                                                                                                                 |
|------------------------|----------|---------------------------------------|------|----|-------------|-------------|-----------------------------------------------------------------------------------------------------------------------------------------------------------------------------------------------------------------------------------------------------------------|
|                        |          |                                       |      |    |             |             | 1276:ENSG00000182952:ENSG00000112763:ENSG00000124508:ENSG00000111801                                                                                                                                                                                            |
| Neuropsych-driven GERD | DEG.down | Brain_Hypothalamus                    | 5904 | 12 | 0.015421949 | 0.83278525  | ENSG00000149292:ENSG00000119718:ENSG00000196628:ENSG00000198492:ENSG00000130766:ENSG00000197386:ENSG00000052795:ENSG00000182952:ENSG00000112763:ENSG00000124508:ENSG00000111801:ENSG00000091831                                                                 |
| Neuropsych-driven GERD | DEG.down | Brain_Nucleus_accumbens_basal_ganglia | 6409 | 11 | 0.064308067 | 1           | ENSG00000149292:ENSG00000119718:ENSG00000196628:ENSG00000198492:ENSG00000130766:ENSG00000151276:ENSG00000052795:ENSG00000182952:ENSG00000112763:ENSG00000124508:ENSG00000111801                                                                                 |
| Neuropsych-driven GERD | DEG.down | Brain_Putamen_basal_ganglia           | 7776 | 15 | 0.009100229 | 0.49141238  | ENSG00000149292:ENSG00000119596:ENSG00000119718:ENSG00000196628:ENSG00000198492:ENSG00000130766:ENSG00000151276:ENSG00000197386:ENSG00000109756:ENSG00000052795:ENSG00000182952:ENSG00000112763:ENSG00000124508:ENSG00000111801:ENSG00000106460                 |
| Neuropsych-driven GERD | DEG.down | Brain_Spinal_cord_cervical_c-1        | 5083 | 9  | 0.081066827 | 1           | ENSG00000149292:ENSG00000187676:ENSG00000198492:ENSG00000130766:ENSG00000197386:ENSG00000112763:ENSG00000124508:ENSG00000111801:ENSG00000010818                                                                                                                 |
| Neuropsych-driven GERD | DEG.down | Brain_Substantia_nigra                | 7162 | 16 | 0.001303485 | 0.070388173 | ENSG00000149292:ENSG00000187676:ENSG00000119596:ENSG00000119718:ENSG00000196628:ENSG00000198492:ENSG00000130766:ENSG00000151276:ENSG00000197386:ENSG00000109756:ENSG00000052795:ENSG00000182952:ENSG00000112763:ENSG00000124508:ENSG00000111801:ENSG00000010818 |
| Neuropsych-driven GERD | DEG.down | Breast_Mammary_Tissue                 | 1001 | 0  | 1           | 1           |                                                                                                                                                                                                                                                                 |
| Neuropsych-driven GERD | DEG.down | Cells_Cultured_fibroblasts            | 2143 | 2  | 0.678279592 | 1           | ENSG00000149292:ENSG00000052795                                                                                                                                                                                                                                 |
| Neuropsych-driven GERD | DEG.down | Cells_EBV-transformed_lymphocytes     | 2383 | 2  | 0.735111133 | 1           | ENSG00000125388:ENSG00000106460                                                                                                                                                                                                                                 |
| Neuropsych-driven GERD | DEG.down | Cervix_Ectocervix                     | 2    | 0  | 1           | 1           |                                                                                                                                                                                                                                                                 |
| Neuropsych-driven GERD | DEG.down | Cervix_Endocervix                     | 5    | 0  | 1           | 1           |                                                                                                                                                                                                                                                                 |

|                        |          |                                     |      |    |             |   |                                                                                                                                                                                                                                                                 |
|------------------------|----------|-------------------------------------|------|----|-------------|---|-----------------------------------------------------------------------------------------------------------------------------------------------------------------------------------------------------------------------------------------------------------------|
| Neuropsych-driven GERD | DEG.down | Colon_Sigmoid                       | 1676 | 0  | 1           | 1 |                                                                                                                                                                                                                                                                 |
| Neuropsych-driven GERD | DEG.down | Colon_Transverse                    | 1583 | 2  | 0.510476092 | 1 | ENSG00000125388:ENSG00000010818                                                                                                                                                                                                                                 |
| Neuropsych-driven GERD | DEG.down | Esophagus_Gastroesophageal_Junction | 1558 | 1  | 0.819323508 | 1 | ENSG00000091831                                                                                                                                                                                                                                                 |
| Neuropsych-driven GERD | DEG.down | Esophagus_Mucosa                    | 3580 | 5  | 0.335491905 | 1 | ENSG00000196628:ENSG00000125388:ENSG00000109756:ENSG0000052795:ENSG00000124508                                                                                                                                                                                  |
| Neuropsych-driven GERD | DEG.down | Esophagus_Muscularis                | 1761 | 0  | 1           | 1 |                                                                                                                                                                                                                                                                 |
| Neuropsych-driven GERD | DEG.down | Fallopian_Tube                      | 1    | 0  | 1           | 1 |                                                                                                                                                                                                                                                                 |
| Neuropsych-driven GERD | DEG.down | Heart_Atrial_Appendage              | 8409 | 13 | 0.088313902 | 1 | ENSG00000149292:ENSG00000119596:ENSG00000119718:ENSG00000196628:ENSG00000198492:ENSG00000130766:ENSG00000151276:ENSG00000197386:ENSG00000109756:ENSG00000112763:ENSG00000124508:ENSG00000111801:ENSG00000010818                                                 |
| Neuropsych-driven GERD | DEG.down | Heart_Left_Ventricle                | 9443 | 16 | 0.023549763 | 1 | ENSG00000149292:ENSG00000119596:ENSG00000119718:ENSG00000196628:ENSG00000198492:ENSG00000130766:ENSG00000151276:ENSG00000125388:ENSG00000197386:ENSG00000109756:ENSG00000182952:ENSG00000112763:ENSG00000124508:ENSG00000111801:ENSG00000010818:ENSG00000106460 |
| Neuropsych-driven GERD | DEG.down | Kidney_Cortex                       | 5544 | 9  | 0.124077702 | 1 | ENSG00000187676:ENSG00000119596:ENSG00000196628:ENSG00000198492:ENSG00000125388:ENSG00000197386:ENSG00000109756:ENSG00000112763:ENSG00000010818                                                                                                                 |
| Neuropsych-driven GERD | DEG.down | Kidney_Medulla                      | 0    | 0  | 1           | 1 |                                                                                                                                                                                                                                                                 |
| Neuropsych-driven GERD | DEG.down | Liver                               | 7985 | 14 | 0.028437248 | 1 | ENSG00000149292:ENSG00000187676:ENSG00000119596:ENSG00000119718:ENSG00000196628:ENSG00000198492:ENSG00000197386:ENSG00000109756:ENSG00000182952:ENSG00000112763:ENSG00000124508:ENSG00000111801:ENSG00000010818:ENSG00000106460                                 |

|                        |          |                                 |      |    |             |             |                                                                                                                                                                                                                                                                                |
|------------------------|----------|---------------------------------|------|----|-------------|-------------|--------------------------------------------------------------------------------------------------------------------------------------------------------------------------------------------------------------------------------------------------------------------------------|
| Neuropsych-driven GERD | DEG.down | Lung                            | 905  | 0  | 1           | 1           |                                                                                                                                                                                                                                                                                |
| Neuropsych-driven GERD | DEG.down | Minor_Salivary_Gland            | 1861 | 2  | 0.599991361 | 1           | ENSG00000196628:ENSG00000125388                                                                                                                                                                                                                                                |
| Neuropsych-driven GERD | DEG.down | Muscle_Skeletal                 | 6836 | 11 | 0.094390173 | 1           | ENSG00000149292:ENSG00000187676:ENSG00000119596:ENSG00000196628:ENSG00000130766:ENSG00000151276:ENSG00000125388:ENSG00000109756:ENSG00000052795:ENSG00000112763:ENSG00000111801                                                                                                |
| Neuropsych-driven GERD | DEG.down | Nerve_Tibial                    | 905  | 0  | 1           | 1           |                                                                                                                                                                                                                                                                                |
| Neuropsych-driven GERD | DEG.down | Ovary                           | 1521 | 1  | 0.811633736 | 1           | ENSG00000151276                                                                                                                                                                                                                                                                |
| Neuropsych-driven GERD | DEG.down | Pancreas                        | 9586 | 17 | 0.011368401 | 0.613893641 | ENSG00000149292:ENSG00000187676:ENSG00000119596:ENSG00000119718:ENSG00000196628:ENSG00000198492:ENSG00000130766:ENSG00000151276:ENSG00000125388:ENSG00000109756:ENSG00000052795:ENSG00000182952:ENSG00000112763:ENSG00000124508:ENSG00000111801:ENSG0000010818:ENSG00000106460 |
| Neuropsych-driven GERD | DEG.down | Pituitary                       | 1927 | 1  | 0.881118575 | 1           | ENSG00000052795                                                                                                                                                                                                                                                                |
| Neuropsych-driven GERD | DEG.down | Prostate                        | 742  | 0  | 1           | 1           |                                                                                                                                                                                                                                                                                |
| Neuropsych-driven GERD | DEG.down | Skin_Not_Sun_Exposed_Suprapubic | 2691 | 3  | 0.55852013  | 1           | ENSG00000130766:ENSG00000125388:ENSG00000091831                                                                                                                                                                                                                                |
| Neuropsych-driven GERD | DEG.down | Skin_Sun_Exposed_Lower_Leg      | 2474 | 1  | 0.936712243 | 1           | ENSG00000125388                                                                                                                                                                                                                                                                |
| Neuropsych-driven GERD | DEG.down | Small_Intestine_Terminal_Ileum  | 1382 | 1  | 0.779807553 | 1           | ENSG00000125388                                                                                                                                                                                                                                                                |

|                           |             |                          |      |    |             |   |                                                                                                                                                                |
|---------------------------|-------------|--------------------------|------|----|-------------|---|----------------------------------------------------------------------------------------------------------------------------------------------------------------|
| Neuropsych-driven<br>GERD | DEG.down    | Spleen                   | 2069 | 1  | 0.898949437 | 1 | ENSG00000125388                                                                                                                                                |
| Neuropsych-driven<br>GERD | DEG.down    | Stomach                  | 2607 | 5  | 0.141915321 | 1 | ENSG00000101489:ENSG00000196628:ENSG00000125388:ENSG0000124508:ENSG00000010818                                                                                 |
| Neuropsych-driven<br>GERD | DEG.down    | Testis                   | 2912 | 3  | 0.614116417 | 1 | ENSG00000109756:ENSG00000111801:ENSG00000010818                                                                                                                |
| Neuropsych-driven<br>GERD | DEG.down    | Thyroid                  | 1038 | 0  | 1           | 1 |                                                                                                                                                                |
| Neuropsych-driven<br>GERD | DEG.down    | Uterus                   | 843  | 0  | 1           | 1 |                                                                                                                                                                |
| Neuropsych-driven<br>GERD | DEG.down    | Vagina                   | 647  | 0  | 1           | 1 |                                                                                                                                                                |
| Neuropsych-driven<br>GERD | DEG.down    | Whole_Blood              | 6908 | 10 | 0.186379769 | 1 | ENSG00000149292:ENSG00000119596:ENSG00000119718:ENSG0000198492:ENSG00000197386:ENSG00000109756:ENSG00000052795:ENSG00000124508:ENSG00000010818:ENSG00000106460 |
| Neuropsych-driven<br>GERD | DEG.twoside | Adipose_Subcutaneous     | 3634 | 2  | 0.913681275 | 1 | ENSG00000196628:ENSG00000052795                                                                                                                                |
| Neuropsych-driven<br>GERD | DEG.twoside | Adipose_Visceral_Omentum | 3414 | 3  | 0.723181831 | 1 | ENSG00000149292:ENSG00000196628:ENSG00000111801                                                                                                                |
| Neuropsych-driven<br>GERD | DEG.twoside | Adrenal_Gland            | 5012 | 7  | 0.28264223  | 1 | ENSG00000187676:ENSG00000101489:ENSG00000151276:ENSG0000109756:ENSG00000052795:ENSG00000111801:ENSG00000106460                                                 |
| Neuropsych-driven<br>GERD | DEG.twoside | Artery_Aorta             | 4216 | 5  | 0.476843585 | 1 | ENSG00000187676:ENSG00000178568:ENSG00000052795:ENSG0000112763:ENSG00000010818                                                                                 |
| Neuropsych-driven<br>GERD | DEG.twoside | Artery_Coronary          | 2987 | 2  | 0.84262816  | 1 | ENSG00000052795:ENSG00000112763                                                                                                                                |

|                        |             |                                      |      |    |             |             |                                                                                                                                                                                                                                                                                                                                                 |
|------------------------|-------------|--------------------------------------|------|----|-------------|-------------|-------------------------------------------------------------------------------------------------------------------------------------------------------------------------------------------------------------------------------------------------------------------------------------------------------------------------------------------------|
| Neuropsych-driven GERD | DEG.twoside | Artery_Tibial                        | 4738 | 5  | 0.587037084 | 1           | ENSG00000187676:ENSG00000119718:ENSG00000052795:ENSG00000112763:ENSG00000010818                                                                                                                                                                                                                                                                 |
| Neuropsych-driven GERD | DEG.twoside | Bladder                              | 946  | 0  | 1           | 1           |                                                                                                                                                                                                                                                                                                                                                 |
| Neuropsych-driven GERD | DEG.twoside | Brain_Amygdala                       | 9498 | 17 | 0.010305458 | 0.55649471  | ENSG00000156395:ENSG00000149292:ENSG00000184226:ENSG00000119596:ENSG00000119718:ENSG00000103449:ENSG00000101489:ENSG00000198492:ENSG00000130766:ENSG00000178568:ENSG00000151276:ENSG00000052795:ENSG00000182952:ENSG00000112763:ENSG00000124508:ENSG00000111801:ENSG00000107105                                                                 |
| Neuropsych-driven GERD | DEG.twoside | Brain_Anterior_cingulate_cortex_BA24 | 9021 | 17 | 0.005878571 | 0.317442855 | ENSG00000156395:ENSG00000149292:ENSG00000184226:ENSG00000119596:ENSG00000119718:ENSG00000103449:ENSG00000101489:ENSG00000178342:ENSG00000116329:ENSG00000198492:ENSG00000130766:ENSG00000178568:ENSG00000182952:ENSG00000112763:ENSG00000124508:ENSG00000111801:ENSG00000107105                                                                 |
| Neuropsych-driven GERD | DEG.twoside | Brain_Caudate_basal_ganglia          | 9070 | 21 | 4.73E-05    | 0.00255277  | ENSG00000156395:ENSG00000149292:ENSG00000187676:ENSG00000184226:ENSG00000119596:ENSG00000119718:ENSG00000103449:ENSG00000101489:ENSG00000187323:ENSG00000116329:ENSG00000198492:ENSG00000130766:ENSG00000178568:ENSG00000151276:ENSG00000188981:ENSG00000052795:ENSG00000182952:ENSG00000112763:ENSG00000124508:ENSG00000111801:ENSG00000107105 |
| Neuropsych-driven GERD | DEG.twoside | Brain_Cerebellar_Hemisphere          | 8908 | 16 | 0.013399544 | 0.723575376 | ENSG00000156395:ENSG00000149292:ENSG00000187676:ENSG00000184226:ENSG00000103449:ENSG00000101489:ENSG00000196628:ENSG00000178568:ENSG00000151276:ENSG00000125388:ENSG00000197386:ENSG00000112763:ENSG00000124508:ENSG0000010818:ENSG00000106460:ENSG00000107105                                                                                  |
| Neuropsych-driven GERD | DEG.twoside | Brain_Cerebellum                     | 8903 | 15 | 0.031418001 | 1           | ENSG00000156395:ENSG00000149292:ENSG00000187676:ENSG00000184226:ENSG00000103449:ENSG00000101489:ENSG00000196628:ENSG00000178568:ENSG00000151276:ENSG00000125388:ENSG00000197386:ENSG00000112763:ENSG00000124508:ENSG0000010818:ENSG00000107105                                                                                                  |
| Neuropsych-driven GERD | DEG.twoside | Brain_Cortex                         | 8348 | 16 | 0.006930731 | 0.374259495 | ENSG00000156395:ENSG00000149292:ENSG00000184226:ENSG00000103449:ENSG00000101489:ENSG00000187323:ENSG00000116329:ENSG00000198492:ENSG00000178568:ENSG00000109756:E                                                                                                                                                                               |

|                        |             |                                       |      |    |             |             |                                                                                                                                                                                                                                                                                                                                                                                 |
|------------------------|-------------|---------------------------------------|------|----|-------------|-------------|---------------------------------------------------------------------------------------------------------------------------------------------------------------------------------------------------------------------------------------------------------------------------------------------------------------------------------------------------------------------------------|
|                        |             |                                       |      |    |             |             | NSG00000052795:ENSG00000182952:ENSG00000112763:ENSG00000124508:ENSG00000111801:ENSG00000107105                                                                                                                                                                                                                                                                                  |
| Neuropsych-driven GERD | DEG.twoside | Brain_Frontal_Cortex_BA9              | 8147 | 14 | 0.033501892 | 1           | ENSG00000156395:ENSG00000149292:ENSG00000184226:ENSG00000103449:ENSG00000101489:ENSG00000187323:ENSG00000116329:ENSG00000178568:ENSG00000109756:ENSG00000112763:ENSG00000124508:ENSG00000111801:ENSG0000010818:ENSG00000107105                                                                                                                                                  |
| Neuropsych-driven GERD | DEG.twoside | Brain_Hippocampus                     | 9458 | 19 | 0.001205599 | 0.065102343 | ENSG00000156395:ENSG00000149292:ENSG00000187676:ENSG00000184226:ENSG00000119596:ENSG00000119718:ENSG00000103449:ENSG00000101489:ENSG00000187323:ENSG00000178342:ENSG00000198492:ENSG00000130766:ENSG00000178568:ENSG00000151276:ENSG00000182952:ENSG00000112763:ENSG00000124508:ENSG00000111801:ENSG00000107105                                                                 |
| Neuropsych-driven GERD | DEG.twoside | Brain_Hypothalamus                    | 8435 | 20 | 6.29E-05    | 0.003394447 | ENSG00000156395:ENSG00000149292:ENSG00000184226:ENSG00000119718:ENSG00000103449:ENSG00000101489:ENSG00000187323:ENSG00000196628:ENSG00000198492:ENSG00000130766:ENSG00000178568:ENSG00000197386:ENSG00000188981:ENSG00000052795:ENSG00000182952:ENSG00000112763:ENSG00000124508:ENSG00000111801:ENSG00000091831:ENSG00000107105                                                 |
| Neuropsych-driven GERD | DEG.twoside | Brain_Nucleus_accumbens_basal_ganglia | 8860 | 21 | 3.21E-05    | 0.001735181 | ENSG00000156395:ENSG00000149292:ENSG00000187676:ENSG00000184226:ENSG00000119718:ENSG00000103449:ENSG00000101489:ENSG00000187323:ENSG00000196628:ENSG00000178342:ENSG00000116329:ENSG00000198492:ENSG00000130766:ENSG00000178568:ENSG00000151276:ENSG00000188981:ENSG00000052795:ENSG00000182952:ENSG00000112763:ENSG00000124508:ENSG00000111801                                 |
| Neuropsych-driven GERD | DEG.twoside | Brain_Putamen_basal_ganglia           | 9517 | 23 | 4.99E-06    | 0.000269579 | ENSG00000156395:ENSG00000149292:ENSG00000187676:ENSG00000184226:ENSG00000119596:ENSG00000119718:ENSG00000103449:ENSG00000101489:ENSG00000187323:ENSG00000196628:ENSG00000116329:ENSG00000198492:ENSG00000130766:ENSG00000178568:ENSG00000151276:ENSG00000197386:ENSG00000109756:ENSG00000052795:ENSG00000182952:ENSG00000112763:ENSG00000124508:ENSG00000111801:ENSG00000106460 |
| Neuropsych-driven GERD | DEG.twoside | Brain_Spinal_cord_cervical_c-1        | 7307 | 11 | 0.136742104 | 1           | ENSG00000149292:ENSG00000187676:ENSG00000184226:ENSG00000103449:ENSG00000198492:ENSG00000130766:ENSG00000197386:ENSG00000112763:ENSG00000124508:ENSG00000111801:ENSG0000010818                                                                                                                                                                                                  |

|                        |             |                                     |      |    |             |             |                                                                                                                                                                                                                                                                                                                                                                 |
|------------------------|-------------|-------------------------------------|------|----|-------------|-------------|-----------------------------------------------------------------------------------------------------------------------------------------------------------------------------------------------------------------------------------------------------------------------------------------------------------------------------------------------------------------|
| Neuropsych-driven GERD | DEG.twoside | Brain_Substantia_nigra              | 8807 | 22 | 6.13E-06    | 0.000331066 | ENSG00000149292:ENSG00000187676:ENSG00000184226:ENSG00000119596:ENSG00000119718:ENSG00000103449:ENSG00000101489:ENSG00000187323:ENSG00000196628:ENSG00000198492:ENSG00000130766:ENSG00000178568:ENSG00000151276:ENSG00000197386:ENSG00000109756:ENSG00000052795:ENSG00000182952:ENSG00000112763:ENSG00000124508:ENSG00000111801:ENSG00000010818:ENSG00000107105 |
| Neuropsych-driven GERD | DEG.twoside | Breast_Mammary_Tissue               | 2965 | 3  | 0.62678498  | 1           | ENSG00000196628:ENSG00000151276:ENSG00000091831                                                                                                                                                                                                                                                                                                                 |
| Neuropsych-driven GERD | DEG.twoside | Cells_Cultured_fibroblasts          | 6478 | 8  | 0.388739865 | 1           | ENSG00000149292:ENSG00000187676:ENSG00000119596:ENSG00000119718:ENSG00000198492:ENSG00000130766:ENSG000000052795:ENSG00000106460                                                                                                                                                                                                                                |
| Neuropsych-driven GERD | DEG.twoside | Cells_EBV-transformed_lymphocytes   | 7452 | 9  | 0.401942495 | 1           | ENSG00000119596:ENSG00000198492:ENSG00000130766:ENSG00000125388:ENSG00000197386:ENSG00000109756:ENSG00000124508:ENSG00000111801:ENSG00000106460                                                                                                                                                                                                                 |
| Neuropsych-driven GERD | DEG.twoside | Cervix_Ectocervix                   | 195  | 1  | 0.188897568 | 1           | ENSG00000091831                                                                                                                                                                                                                                                                                                                                                 |
| Neuropsych-driven GERD | DEG.twoside | Cervix_Endocervix                   | 1834 | 5  | 0.04377702  | 1           | ENSG00000119596:ENSG00000103449:ENSG00000112763:ENSG00000111801:ENSG00000091831                                                                                                                                                                                                                                                                                 |
| Neuropsych-driven GERD | DEG.twoside | Colon_Sigmoid                       | 3313 | 0  | 1           | 1           |                                                                                                                                                                                                                                                                                                                                                                 |
| Neuropsych-driven GERD | DEG.twoside | Colon_Transverse                    | 3185 | 2  | 0.868476741 | 1           | ENSG00000125388:ENSG0000010818                                                                                                                                                                                                                                                                                                                                  |
| Neuropsych-driven GERD | DEG.twoside | Esophagus_Gastroesophageal_Junction | 2845 | 2  | 0.821469337 | 1           | ENSG00000184226:ENSG00000091831                                                                                                                                                                                                                                                                                                                                 |
| Neuropsych-driven GERD | DEG.twoside | Esophagus_Mucosa                    | 5811 | 6  | 0.608326868 | 1           | ENSG00000196628:ENSG00000130766:ENSG00000125388:ENSG00000109756:ENSG00000052795:ENSG00000124508                                                                                                                                                                                                                                                                 |
| Neuropsych-driven GERD | DEG.twoside | Esophagus_Muscularis                | 3072 | 2  | 0.854223069 | 1           | ENSG00000184226:ENSG00000052795                                                                                                                                                                                                                                                                                                                                 |

|                        |             |                        |      |    |             |   |                                                                                                                                                                                                                                                                |
|------------------------|-------------|------------------------|------|----|-------------|---|----------------------------------------------------------------------------------------------------------------------------------------------------------------------------------------------------------------------------------------------------------------|
| Neuropsych-driven GERD | DEG.twoside | Fallopian_Tube         | 486  | 2  | 0.095011901 | 1 | ENSG00000112763:ENSG00000091831                                                                                                                                                                                                                                |
| Neuropsych-driven GERD | DEG.twoside | Heart_Atrial_Appendage | 9152 | 14 | 0.081500414 | 1 | ENSG00000149292:ENSG00000187676:ENSG00000119596:ENSG00000119718:ENSG00000196628:ENSG00000198492:ENSG00000130766:ENSG00000151276:ENSG00000197386:ENSG00000109756:ENSG00000112763:ENSG00000124508:ENSG00000111801:ENSG0000010818                                 |
| Neuropsych-driven GERD | DEG.twoside | Heart_Left_Ventricle   | 9979 | 16 | 0.039091978 | 1 | ENSG00000149292:ENSG00000119596:ENSG00000119718:ENSG00000196628:ENSG00000198492:ENSG00000130766:ENSG00000151276:ENSG00000125388:ENSG00000197386:ENSG00000109756:ENSG00000182952:ENSG00000112763:ENSG00000124508:ENSG00000111801:ENSG0000010818:ENSG00000106460 |
| Neuropsych-driven GERD | DEG.twoside | Kidney_Cortex          | 6871 | 10 | 0.181794266 | 1 | ENSG00000187676:ENSG00000119596:ENSG00000103449:ENSG00000196628:ENSG00000198492:ENSG00000125388:ENSG00000197386:ENSG00000109756:ENSG00000112763:ENSG0000010818                                                                                                 |
| Neuropsych-driven GERD | DEG.twoside | Kidney_Medulla         | 95   | 0  | 1           | 1 |                                                                                                                                                                                                                                                                |
| Neuropsych-driven GERD | DEG.twoside | Liver                  | 9510 | 15 | 0.054553917 | 1 | ENSG00000149292:ENSG00000187676:ENSG00000119596:ENSG00000119718:ENSG00000103449:ENSG00000196628:ENSG00000198492:ENSG00000197386:ENSG00000109756:ENSG00000182952:ENSG00000112763:ENSG00000124508:ENSG00000111801:ENSG0000010818:ENSG00000106460                 |
| Neuropsych-driven GERD | DEG.twoside | Lung                   | 5100 | 6  | 0.470417657 | 1 | ENSG00000196628:ENSG00000109756:ENSG00000052795:ENSG00000112763:ENSG00000124508:ENSG00000111801                                                                                                                                                                |
| Neuropsych-driven GERD | DEG.twoside | Minor_Salivary_Gland   | 3752 | 2  | 0.922964356 | 1 | ENSG00000196628:ENSG00000125388                                                                                                                                                                                                                                |
| Neuropsych-driven GERD | DEG.twoside | Muscle_Skeletal        | 7979 | 11 | 0.213611622 | 1 | ENSG00000149292:ENSG00000187676:ENSG00000119596:ENSG00000196628:ENSG00000130766:ENSG00000151276:ENSG00000125388:ENSG00000109756:ENSG00000052795:ENSG00000112763:ENSG00000111801                                                                                |
| Neuropsych-driven GERD | DEG.twoside | Nerve_Tibial           | 6774 | 10 | 0.170055419 | 1 | ENSG00000156395:ENSG00000184226:ENSG00000119596:ENSG00000151276:ENSG00000125388:ENSG00000197386:ENSG00000109756:ENSG00000052795:ENSG00000164123:ENSG00000106460                                                                                                |

|                        |             |                                 |       |    |             |   |                                                                                                                                                                                                                                                                                |
|------------------------|-------------|---------------------------------|-------|----|-------------|---|--------------------------------------------------------------------------------------------------------------------------------------------------------------------------------------------------------------------------------------------------------------------------------|
| Neuropsych-driven GERD | DEG.twoside | Ovary                           | 7195  | 12 | 0.063435039 | 1 | ENSG00000156395:ENSG00000149292:ENSG00000119596:ENSG00000119608:ENSG00000103449:ENSG00000196628:ENSG00000130766:ENSG00000151276:ENSG00000124508:ENSG00000111801:ENSG00000010818:ENSG00000091831                                                                                |
| Neuropsych-driven GERD | DEG.twoside | Pancreas                        | 10331 | 17 | 0.0245229   | 1 | ENSG00000149292:ENSG00000187676:ENSG00000119596:ENSG00000119718:ENSG00000196628:ENSG00000198492:ENSG00000130766:ENSG00000151276:ENSG00000125388:ENSG00000109756:ENSG00000052795:ENSG00000182952:ENSG00000112763:ENSG00000124508:ENSG00000111801:ENSG0000010818:ENSG00000106460 |
| Neuropsych-driven GERD | DEG.twoside | Pituitary                       | 7083  | 10 | 0.20884797  | 1 | ENSG00000156395:ENSG00000149292:ENSG00000170209:ENSG00000103449:ENSG00000101489:ENSG00000178568:ENSG00000125388:ENSG00000052795:ENSG00000111801:ENSG00000091831                                                                                                                |
| Neuropsych-driven GERD | DEG.twoside | Prostate                        | 4048  | 3  | 0.826346113 | 1 | ENSG00000149292:ENSG00000170209:ENSG00000091831                                                                                                                                                                                                                                |
| Neuropsych-driven GERD | DEG.twoside | Skin_Not_Sun_Exposed_Suprapubic | 5432  | 5  | 0.71394429  | 1 | ENSG00000170209:ENSG00000198492:ENSG00000130766:ENSG00000125388:ENSG00000091831                                                                                                                                                                                                |
| Neuropsych-driven GERD | DEG.twoside | Skin_Sun_Exposed_Lower_Leg      | 5275  | 3  | 0.937940746 | 1 | ENSG00000170209:ENSG00000198492:ENSG00000125388                                                                                                                                                                                                                                |
| Neuropsych-driven GERD | DEG.twoside | Small_Intestine_Terminal_Ileum  | 4120  | 3  | 0.835798121 | 1 | ENSG00000125388:ENSG00000124508:ENSG00000111801                                                                                                                                                                                                                                |
| Neuropsych-driven GERD | DEG.twoside | Spleen                          | 6309  | 5  | 0.834008785 | 1 | ENSG00000151276:ENSG00000125388:ENSG00000112763:ENSG00000124508:ENSG00000111801                                                                                                                                                                                                |
| Neuropsych-driven GERD | DEG.twoside | Stomach                         | 3709  | 5  | 0.364104936 | 1 | ENSG00000101489:ENSG00000196628:ENSG00000125388:ENSG00000124508:ENSG00000010818                                                                                                                                                                                                |
| Neuropsych-driven GERD | DEG.twoside | Testis                          | 15238 | 16 | 0.609243052 | 1 | ENSG00000149292:ENSG00000170209:ENSG00000119596:ENSG00000119718:ENSG00000187323:ENSG00000178342:ENSG00000130766:ENSG00000178568:ENSG00000151276:ENSG00000125388:ENSG00000188981:ENSG00000109756:ENSG00000164123:ENSG00000111801:ENSG0000010818:ENSG00000107105                 |

|                           |             |             |      |    |             |   |                                                                                                                                                                               |
|---------------------------|-------------|-------------|------|----|-------------|---|-------------------------------------------------------------------------------------------------------------------------------------------------------------------------------|
| Neuropsych-driven<br>GERD | DEG.twoside | Thyroid     | 6725 | 7  | 0.600430352 | 1 | ENSG00000149292:ENSG00000119608:ENSG00000119718:ENSG0000103449:ENSG00000151276:ENSG00000109756:ENSG0000011801                                                                 |
| Neuropsych-driven<br>GERD | DEG.twoside | Uterus      | 6387 | 9  | 0.23045585  | 1 | ENSG00000187676:ENSG00000119596:ENSG00000103449:ENSG0000196628:ENSG00000112763:ENSG00000124508:ENSG0000011801:ENSG00000091831:ENSG00000106460                                 |
| Neuropsych-driven<br>GERD | DEG.twoside | Vagina      | 3487 | 4  | 0.521272581 | 1 | ENSG00000170209:ENSG00000103449:ENSG00000111801:ENSG0000091831                                                                                                                |
| Neuropsych-driven<br>GERD | DEG.twoside | Whole_Blood | 8941 | 11 | 0.351197165 | 1 | ENSG00000149292:ENSG00000119596:ENSG00000119718:ENSG0000178342:ENSG00000198492:ENSG00000197386:ENSG00000109756:ENSG00000052795:ENSG00000124508:ENSG0000010818:ENSG00000106460 |

**ST15. GWAS Summary statistics for the 88 GERD loci on BE, EA and BEEA combined (BEACON, Cambridge, Bonn data)**

| Loci Subgroup          | SNP        | E A | NEA | An et al. GERD GWAS |          | MTAG GERD |          | BMI GWAS (for sensitivity analysis) |          | Barrett Esophagus GWAS |            | Eso. Adenocarcinoma GWAS |            | BEEA Combined |              |                   |
|------------------------|------------|-----|-----|---------------------|----------|-----------|----------|-------------------------------------|----------|------------------------|------------|--------------------------|------------|---------------|--------------|-------------------|
|                        |            |     |     | Beta GERD           | Pval     | MTAG beta | Pval     | BMI beta                            | BMI Pval | BE_B ETA               | BE_Pv alue | EA_BE TA                 | EA_Pv alue | BEEA_BETA     | BEEA_P value | BEEA_Effe ctive_n |
| Obesity-driven GERD    | rs12357321 | g   | a   | -0.02               | 0.000326 | -0.03     | 1.33E-09 | 0.025                               | 1.50E-37 | 0.009                  | 0.713      | -0.003                   | 0.918      | -0.0137       | 4.14E-01     | 8381              |
| depression-driven GERD | rs1021363  | a   | g   | 0.03                | 1.17E-05 | 0.03      | 5.10E-10 | -0.003                              | 1.40E-01 | -0.024                 | 0.293      | -0.0024                  | 0.932      | -0.0142       | 3.79E-01     | 8262              |
| Obesity-driven GERD    | rs761777   | a   | g   | -0.03               | 1.51E-06 | -0.03     | 4.71E-10 | 0.016                               | 5.70E-10 | -0.050                 | 0.060      | 0.0366                   | 0.271      | -0.039        | 3.38E-02     | 7765              |
| Obesity-driven GERD    | rs10837002 | c   | g   | -0.03               | 1.11E-05 | -0.03     | 4.03E-08 | 0.012                               | 3.70E-09 | -0.026                 | 0.255      | 0.0057                   | 0.842      | -0.0236       | 1.45E-01     | 8377              |
| Obesity-driven GERD    | rs7942368  | c   | t   | 0.03                | 5.29E-05 | 0.03      | 9.54E-09 | -0.018                              | 6.80E-11 | 0.015                  | 0.585      | 0.0049                   | 0.881      | 0.0124        | 5.07E-01     | 8422              |
| UNCLEAR                | rs10789931 | c   | t   | -0.04               | 9.26E-07 | -0.04     | 2.09E-08 | -0.007                              | 2.60E-02 | -0.028                 | 0.398      | 0.0429                   | 0.303      | -0.0403       | 8.93E-02     | 8481              |
| depression-driven GERD | rs2734839  | c   | t   | 0.02                | 0.001155 | 0.03      | 8.79E-09 | -0.004                              | 4.70E-02 | 0.043                  | 0.059      | 0.0308                   | 0.270      | 0.0364        | 2.15E-02     | 8424              |
| Obesity-driven GERD    | rs1479405  | c   | t   | -0.03               | 1.12E-07 | -0.03     | 9.85E-10 | -0.047                              | 1.60E-36 | -0.003                 | 0.888      | -0.0063                  | 0.827      | -0.0032       | 8.45E-01     | 8486              |
| Obesity-driven GERD    | rs773109   | g   | a   | 0.03                | 2.65E-07 | 0.04      | 8.71E-14 | 0.016                               | 1.30E-14 | 0.045                  | 0.057      | 0.0607                   | 0.039      | 0.0376        | 2.37E-02     | 8190              |
| depression-driven GERD | rs324769   | c   | t   | 0.02                | 0.00199  | 0.03      | 3.05E-08 | -0.002                              | 3.70E-01 | 0.003                  | 0.878      | -0.0198                  | 0.468      | 0.0077        | 6.22E-01     | 8309              |
| UNCLEAR                | rs1716171  | c   | t   | -0.03               | 0.000104 | -0.04     | 7.82E-11 | -0.003                              | 3.00E-01 | 0.012                  | 0.667      | 0.0478                   | 0.151      | 0.0296        | 1.19E-01     | 8389              |
| depression-driven GERD | rs9542729  | c   | g   | 0.03                | 7.76E-05 | 0.04      | 1.41E-09 | -0.004                              | 5.20E-02 | 0.043                  | 0.128      | 0.0452                   | 0.194      | 0.0474        | 1.54E-02     | 7971              |
| Obesity-driven GERD    | rs1334297  | g   | a   | 0.02                | 0.001211 | 0.04      | 1.14E-12 | 0.014                               | 2.50E-11 | 0.017                  | 0.485      | -0.0086                  | 0.779      | -0.0108       | 5.36E-01     | 8334              |
| depression-driven GERD | rs9540720  | a   | g   | -0.03               | 2.04E-06 | -0.03     | 3.01E-08 | 0.003                               | 2.10E-01 | 0.026                  | 0.245      | 0.0038                   | 0.890      | 0.0065        | 6.73E-01     | 8441              |
| Obesity-driven GERD    | rs9517313  | g   | c   | -0.02               | 2.69E-05 | -0.03     | 2.05E-11 | 0.011                               | 4.30E-07 | -0.001                 | 0.966      | -0.0169                  | 0.552      | -0.0146       | 3.67E-01     | 8081              |
| depression-driven GERD | rs957345   | c   | g   | -0.03               | 3.35E-06 | -0.03     | 1.72E-09 | -0.006                              | 4.80E-03 | 0.022                  | 0.330      | 0.0586                   | 0.032      | 0.0254        | 1.02E-01     | 8383              |
| UNCLEAR                | rs17701934 | t   | c   | 0.03                | 5.29E-06 | 0.03      | 4.60E-08 | 0.005                               | 6.20E-03 | 0.031                  | 0.170      | 0.0215                   | 0.447      | 0.0228        | 1.49E-01     | 8136              |

|                        |            |   |   |       |          |       |          |        |          |        |       |         |       |         |          |      |
|------------------------|------------|---|---|-------|----------|-------|----------|--------|----------|--------|-------|---------|-------|---------|----------|------|
| Obesity-driven GERD    | rs942065   | g | a | -0.02 | 0.000161 | -0.03 | 8.45E-10 | -0.074 | #####    | 0.028  | 0.231 | 0.0134  | 0.641 | 0.029   | 7.29E-02 | 8205 |
| Obesity-driven GERD    | rs10133111 | g | a | -0.04 | 1.99E-06 | -0.04 | 1.35E-10 | -0.009 | 2.30E-06 | -0.016 | 0.601 | -0.02   | 0.593 | -0.0238 | 2.58E-01 | 8376 |
| depression-driven GERD | rs11645288 | g | a | -0.03 | 6.29E-05 | -0.03 | 2.78E-08 | -0.008 | 1.10E-04 | -0.042 | 0.168 | -0.0331 | 0.357 | -0.0231 | 2.60E-01 | 7637 |
| Obesity-driven GERD    | rs9940128  | g | a | -0.01 | 0.1777   | -0.03 | 8.06E-12 | -0.010 | 3.50E-07 | -0.035 | 0.120 | -0.0836 | 0.002 | -0.0392 | 1.23E-02 | 8302 |
| depression-driven GERD | rs12598916 | c | g | 0.03  | 2.77E-07 | 0.03  | 6.87E-10 | 0.003  | 1.90E-01 | -0.021 | 0.405 | 0.0112  | 0.712 | -0.0071 | 6.82E-01 | 8376 |
| Obesity-driven GERD    | rs7206608  | c | g | -0.03 | 1.16E-06 | -0.03 | 1.46E-08 | -0.013 | 1.40E-11 | -0.020 | 0.393 | 0.05    | 0.091 | 0.0089  | 5.93E-01 | 8271 |
| UNCLEAR                | rs12453010 | c | t | -0.04 | 1.84E-11 | -0.03 | 1.75E-09 | -0.003 | 9.20E-02 | -0.027 | 0.228 | -0.0165 | 0.555 | -0.0282 | 7.44E-02 | 8418 |
| depression-driven GERD | rs12967855 | a | g | 0.03  | 2.61E-05 | 0.04  | 1.09E-12 | -0.005 | 3.10E-02 | 0.022  | 0.359 | 0.04    | 0.170 | 0.0267  | 1.06E-01 | 8266 |
| depression-driven GERD | rs1431196  | a | g | -0.02 | 2.84E-05 | -0.03 | 2.65E-11 | -0.010 | 3.10E-07 | -0.013 | 0.557 | -0.049  | 0.074 | -0.0308 | 4.93E-02 | 8289 |
| depression-driven GERD | rs1942262  | g | a | -0.03 | 9.01E-06 | -0.03 | 2.60E-09 | 0.002  | 3.70E-01 | -0.008 | 0.744 | -0.0428 | 0.151 | -0.0246 | 1.48E-01 | 8368 |
| depression-driven GERD | rs7241572  | g | a | -0.02 | 0.000363 | -0.04 | 9.49E-10 | -0.006 | 2.30E-03 | 0.039  | 0.176 | 0.0224  | 0.528 | 0.0094  | 6.36E-01 | 7612 |
| Obesity-driven GERD    | rs9636202  | g | a | 0.03  | 3.11E-07 | 0.04  | 1.51E-10 | -0.013 | 1.60E-11 | 0.079  | 0.003 | -0.0117 | 0.708 | 0.0358  | 4.83E-02 | 7875 |
| Obesity-driven GERD    | rs2023878  | c | t | 0.04  | 3.88E-09 | 0.04  | 3.04E-09 | 0.016  | 1.90E-14 | 0.066  | 0.022 | 0.1206  | 0.001 | 0.0786  | 8.99E-05 | 8034 |
| depression-driven GERD | rs569356   | a | g | 0.03  | 2.59E-05 | 0.04  | 4.07E-08 | -0.002 | 4.40E-01 | 0.014  | 0.660 | -0.017  | 0.670 | 0.0145  | 5.24E-01 | 8182 |
| Obesity-driven GERD    | rs3766823  | g | a | -0.03 | 2.76E-06 | -0.04 | 7.09E-10 | -0.013 | 3.20E-11 | -0.083 | 0.004 | 0.0135  | 0.705 | -0.0267 | 1.92E-01 | 8367 |
| UNCLEAR                | rs2782641  | g | a | -0.01 | 0.0115   | -0.03 | 4.33E-08 | -0.002 | 2.40E-01 | -0.002 | 0.929 | -0.0023 | 0.935 | -0.0093 | 5.60E-01 | 8250 |
| Obesity-driven GERD    | rs1937450  | t | g | -0.03 | 1.05E-08 | -0.03 | 7.07E-11 | -0.007 | 1.50E-04 | 0.006  | 0.804 | -0.0392 | 0.154 | -0.0053 | 7.32E-01 | 8359 |
| Obesity-driven GERD    | rs2815749  | a | g | -0.03 | 4.80E-05 | -0.04 | 1.07E-10 | -0.031 | 4.00E-37 | -0.040 | 0.162 | -0.0178 | 0.616 | -0.0184 | 3.55E-01 | 8072 |
| Obesity-driven GERD    | rs17379561 | a | t | -0.05 | 1.40E-08 | -0.05 | 1.08E-14 | -0.021 | 3.50E-15 | -0.028 | 0.377 | 0.019   | 0.624 | -0.0078 | 7.22E-01 | 8390 |
| Obesity-driven GERD    | rs861575   | t | c | -0.02 | 1.99E-05 | -0.03 | 1.63E-08 | -0.027 | 1.80E-35 | 0.034  | 0.136 | -0.0264 | 0.341 | 0.0017  | 9.15E-01 | 8199 |
| UNCLEAR                | rs7527682  | a | g | 0.03  | 1.73E-06 | 0.03  | 3.13E-08 | 0.004  | 5.10E-02 | 0.016  | 0.473 | 0.0091  | 0.741 | 0.0209  | 1.78E-01 | 8363 |

|                        |            |   |   |       |          |       |          |        |          |        |       |         |       |         |          |      |
|------------------------|------------|---|---|-------|----------|-------|----------|--------|----------|--------|-------|---------|-------|---------|----------|------|
| UNCLEAR                | rs7541875  | a | g | -0.03 | 8.63E-08 | -0.03 | 1.61E-08 | -0.006 | 3.20E-03 | -0.015 | 0.508 | -0.0053 | 0.847 | -0.0196 | 2.08E-01 | 8432 |
| Obesity-driven GERD    | rs903678   | g | a | -0.01 | 0.02933  | -0.03 | 4.89E-08 | 0.018  | 2.00E-15 | -0.016 | 0.490 | -0.0336 | 0.242 | -0.0193 | 2.38E-01 | 8410 |
| UNCLEAR                | rs1883842  | t | g | -0.03 | 5.85E-06 | -0.03 | 9.27E-09 | -0.003 | 1.50E-01 | -0.012 | 0.626 | -0.03   | 0.333 | -0.0283 | 1.06E-01 | 8189 |
| UNCLEAR                | rs2834005  | t | c | -0.03 | 4.06E-08 | -0.03 | 9.42E-09 | -0.006 | 3.60E-03 | -0.036 | 0.127 | -0.0042 | 0.886 | -0.0265 | 1.10E-01 | 8403 |
| Obesity-driven GERD    | rs2183588  | a | g | -0.02 | 0.000292 | -0.03 | 1.22E-08 | -0.009 | 9.20E-05 | -0.053 | 0.022 | -0.0636 | 0.025 | -0.0357 | 2.72E-02 | 8314 |
| Obesity-driven GERD    | rs2838771  | g | c | 0.02  | 8.05E-05 | 0.03  | 2.91E-08 | -0.013 | 7.40E-07 | 0.014  | 0.559 | 0.0624  | 0.029 | 0.0221  | 1.74E-01 | 8320 |
| Obesity-driven GERD    | rs9615905  | c | t | -0.02 | 3.61E-05 | -0.03 | 1.21E-08 | -0.020 | 2.80E-23 | -0.015 | 0.505 | -0.0095 | 0.728 | -0.0152 | 3.29E-01 | 8281 |
| depression-driven GERD | rs4300861  | c | t | -0.02 | 3.77E-05 | -0.03 | 5.43E-10 | 0.006  | 5.40E-03 | -0.007 | 0.750 | 0.0524  | 0.063 | -0.0049 | 7.59E-01 | 8278 |
| Obesity-driven GERD    | rs12997558 | g | a | -0.02 | 0.000227 | -0.03 | 3.04E-08 | -0.008 | 3.70E-04 | -0.033 | 0.158 | -0.0119 | 0.676 | -0.0353 | 2.83E-02 | 8376 |
| Obesity-driven GERD    | rs1011407  | a | g | 0.03  | 0.000128 | 0.04  | 1.09E-08 | -0.019 | 3.10E-19 | 0.011  | 0.748 | -0.0036 | 0.931 | 0.0143  | 5.50E-01 | 8319 |
| UNCLEAR                | rs4851239  | c | t | 0.03  | 1.83E-09 | 0.03  | 3.24E-11 | 0.002  | 2.30E-01 | 0.000  | 0.994 | 0.0502  | 0.075 | 0.0159  | 3.18E-01 | 8406 |
| Obesity-driven GERD    | rs6711584  | g | a | -0.02 | 2.31E-05 | -0.03 | 2.66E-11 | -0.012 | 7.10E-09 | -0.007 | 0.757 | -0.016  | 0.563 | -0.0072 | 6.41E-01 | 8383 |
| UNCLEAR                | rs13409451 | a | g | 0.01  | 0.01185  | 0.03  | 1.93E-08 | 0.004  | 5.10E-02 | -0.004 | 0.875 | 0.042   | 0.135 | 0.0283  | 7.52E-02 | 8289 |
| UNCLEAR                | rs2358016  | c | g | -0.02 | 6.65E-05 | -0.03 | 4.17E-09 | -0.005 | 1.60E-02 | -0.025 | 0.265 | -0.0287 | 0.290 | -0.0416 | 6.90E-03 | 8433 |
| Obesity-driven GERD    | rs1596747  | a | g | -0.03 | 8.97E-07 | -0.03 | 1.00E-10 | 0.020  | 2.50E-15 | -0.035 | 0.114 | -0.003  | 0.911 | -0.024  | 1.22E-01 | 8326 |
| depression-driven GERD | rs7600261  | c | t | -0.02 | 0.000503 | -0.03 | 9.47E-11 | 0.001  | 4.80E-01 | 0.001  | 0.969 | -0.0384 | 0.205 | -0.0132 | 4.38E-01 | 8086 |
| Obesity-driven GERD    | rs7612999  | g | a | -0.03 | 5.56E-05 | -0.03 | 4.90E-08 | 0.014  | 8.40E-13 | 0.041  | 0.112 | 0.0153  | 0.627 | 0.0171  | 3.39E-01 | 8361 |
| Obesity-driven GERD    | rs6441814  | g | a | 0.03  | 7.89E-06 | 0.03  | 3.86E-09 | 0.013  | 1.90E-10 | 0.030  | 0.183 | 0.0735  | 0.007 | 0.044   | 4.92E-03 | 8246 |
| Obesity-driven GERD    | rs2240326  | g | a | 0.03  | 4.10E-08 | 0.05  | 1.13E-22 | 0.010  | 1.90E-06 | 0.015  | 0.507 | 0.0467  | 0.087 | 0.0273  | 7.68E-02 | 8464 |
| depression-driven GERD | rs2016933  | c | g | 0.03  | 2.72E-05 | 0.03  | 1.04E-08 | 0.008  | 1.60E-04 | -0.003 | 0.919 | -0.0493 | 0.107 | -0.015  | 3.89E-01 | 8333 |
| Obesity-driven GERD    | rs6780459  | a | t | -0.03 | 2.28E-06 | -0.03 | 3.14E-08 | 0.015  | 3.10E-10 | -0.004 | 0.869 | 0.0328  | 0.298 | -0.0019 | 9.15E-01 | 8355 |

|                        |            |   |   |       |          |       |          |        |          |        |       |         |       |           |          |      |
|------------------------|------------|---|---|-------|----------|-------|----------|--------|----------|--------|-------|---------|-------|-----------|----------|------|
| depression-driven GERD | rs7685686  | a | g | 0.01  | 0.03756  | 0.03  | 1.14E-08 | 0.006  | 1.20E-02 | 0.008  | 0.732 | 0.0593  | 0.031 | 0.0234    | 1.33E-01 | 8449 |
| Obesity-driven GERD    | rs2164300  | c | t | 0.02  | 0.001402 | 0.03  | 4.13E-08 | 0.017  | 9.10E-09 | 0.013  | 0.581 | -0.023  | 0.411 | -0.0151   | 3.39E-01 | 8027 |
| Obesity-driven GERD    | rs7675588  | c | a | 0.04  | 1.24E-07 | 0.03  | 1.80E-08 | -0.012 | 4.60E-09 | -0.011 | 0.695 | -0.0077 | 0.818 | -9.00E-04 | 9.62E-01 | 8479 |
| Obesity-driven GERD    | rs920559   | c | g | -0.04 | 5.52E-06 | -0.04 | 2.06E-08 | -0.012 | 1.90E-08 | -0.056 | 0.072 | -0.0533 | 0.172 | -0.0441   | 4.41E-02 | 8146 |
| Obesity-driven GERD    | rs13107325 | c | t | -0.05 | 2.40E-07 | -0.07 | 2.20E-14 | -0.013 | 2.30E-10 | -0.069 | 0.092 | -0.028  | 0.594 | -0.0719   | 1.42E-02 | 8495 |
| Obesity-driven GERD    | rs1510719  | t | c | 0.03  | 4.10E-09 | 0.04  | 3.84E-15 | -0.008 | 8.60E-05 | 0.013  | 0.562 | 0.0581  | 0.041 | 0.0409    | 1.08E-02 | 8284 |
| depression-driven GERD | rs10010963 | c | t | 0.02  | 0.003845 | 0.03  | 4.92E-08 | 0.007  | 5.20E-04 | 0.003  | 0.884 | 0.033   | 0.235 | 0.0129    | 4.19E-01 | 8355 |
| depression-driven GERD | rs1592757  | g | c | -0.01 | 0.01453  | -0.03 | 6.00E-10 | -0.008 | 1.90E-04 | 0.019  | 0.422 | 0.02    | 0.485 | 0.0017    | 9.16E-01 | 8334 |
| depression-driven GERD | rs11953061 | c | t | -0.02 | 0.000509 | -0.03 | 3.10E-08 | -0.009 | 8.10E-06 | 0.006  | 0.795 | -0.0459 | 0.111 | -0.009    | 5.81E-01 | 8377 |
| Obesity-driven GERD    | rs329122   | g | a | 0.02  | 0.000517 | 0.03  | 3.05E-09 | 0.014  | 1.50E-08 | 0.054  | 0.016 | 0.0526  | 0.058 | 0.0509    | 1.16E-03 | 8335 |
| UNCLEAR                | rs6939294  | c | t | 0.03  | 0.000138 | 0.04  | 2.71E-10 | 0.008  | 9.30E-04 | -0.017 | 0.516 | -0.0324 | 0.307 | -0.007    | 7.02E-01 | 8663 |
| depression-driven GERD | rs2145318  | t | a | -0.03 | 1.26E-07 | -0.04 | 2.03E-13 | 0.001  | 8.00E-01 | 0.021  | 0.348 | -0.0241 | 0.378 | -0.0103   | 5.04E-01 | 8329 |
| Obesity-driven GERD    | rs4713692  | c | t | 0.02  | 0.00062  | 0.03  | 3.07E-08 | -0.016 | 6.60E-09 | -0.014 | 0.569 | -0.0607 | 0.035 | -0.0075   | 6.50E-01 | 7910 |
| Obesity-driven GERD    | rs205262   | a | g | -0.03 | 1.13E-06 | -0.03 | 1.38E-10 | 0.014  | 3.60E-12 | -0.054 | 0.029 | 0.0255  | 0.404 | -0.0227   | 1.90E-01 | 8427 |
| Obesity-driven GERD    | rs9372625  | g | a | 0.03  | 1.41E-07 | 0.04  | 2.62E-14 | -0.012 | 1.00E-08 | 0.034  | 0.143 | 0.0575  | 0.042 | 0.038     | 1.82E-02 | 8215 |
| depression-driven GERD | rs9373363  | a | g | 0.03  | 5.24E-06 | 0.03  | 4.13E-09 | -0.002 | 3.40E-01 | -0.038 | 0.137 | -0.0061 | 0.847 | -0.0233   | 1.92E-01 | 8298 |
| depression-driven GERD | rs12204714 | c | t | 0.02  | 0.000722 | 0.03  | 7.92E-09 | -0.007 | 4.80E-04 | -0.049 | 0.035 | -0.0343 | 0.236 | -0.0325   | 4.52E-02 | 8214 |
| Obesity-driven GERD    | rs11762636 | c | a | 0.04  | 6.66E-08 | 0.05  | 1.88E-16 | 0.012  | 7.50E-09 | -0.015 | 0.604 | 0.0464  | 0.178 | 0.031     | 1.18E-01 | 8582 |
| UNCLEAR                | rs10242223 | a | g | 0.03  | 5.28E-09 | 0.03  | 3.79E-08 | -0.001 | 7.80E-01 | 0.055  | 0.019 | 0.0378  | 0.193 | 0.0478    | 3.97E-03 | 8247 |
| depression-driven GERD | rs2043539  | g | a | -0.02 | 0.001688 | -0.03 | 2.24E-08 | 0.005  | 6.40E-03 | 0.048  | 0.032 | 0.0464  | 0.094 | 0.0466    | 3.05E-03 | 8348 |
| Obesity-driven GERD    | rs215614   | g | a | 0.03  | 5.95E-06 | 0.03  | 4.08E-11 | -0.014 | 1.60E-09 | 0.027  | 0.240 | 0.0105  | 0.749 | 0.0168    | 2.97E-01 | 8307 |

|                        |           |   |   |       |          |       |          |        |          |        |       |         |       |         |          |      |
|------------------------|-----------|---|---|-------|----------|-------|----------|--------|----------|--------|-------|---------|-------|---------|----------|------|
| depression-driven GERD | rs2396133 | a | g | -0.03 | 2.02E-06 | -0.03 | 1.11E-09 | -0.005 | 3.10E-02 | -0.038 | 0.091 | -0.0732 | 0.008 | -0.0289 | 6.31E-02 | 8244 |
| Obesity-driven GERD    | rs2396766 | g | a | -0.03 | 4.17E-08 | -0.03 | 2.33E-11 | -0.009 | 2.00E-05 | -0.023 | 0.303 | -0.0268 | 0.324 | -0.0433 | 5.19E-03 | 8351 |
| UNCLEAR                | rs2106353 | g | t | -0.04 | 1.15E-08 | -0.04 | 1.37E-10 | -0.004 | 6.80E-02 | -0.026 | 0.337 | -0.0124 | 0.710 | -0.0077 | 6.81E-01 | 8150 |
| Obesity-driven GERD    | rs3863241 | c | t | -0.03 | 4.80E-08 | -0.03 | 1.49E-11 | 0.011  | 6.80E-08 | -0.016 | 0.480 | -0.0084 | 0.756 | -0.0342 | 2.74E-02 | 8350 |
| Obesity-driven GERD    | rs903959  | t | a | -0.02 | 1.42E-05 | -0.03 | 2.99E-09 | -0.024 | 3.50E-31 | -0.008 | 0.720 | -0.0272 | 0.327 | -0.0037 | 8.16E-01 | 8373 |
| depression-driven GERD | rs3793577 | a | g | -0.02 | 0.000492 | -0.03 | 2.49E-08 | -0.001 | 6.60E-01 | 0.001  | 0.952 | -0.0403 | 0.158 | -0.0255 | 1.08E-01 | 8057 |
| depression-driven GERD | rs7032155 | c | a | -0.02 | 0.000436 | -0.03 | 1.63E-08 | 0.008  | 1.70E-04 | 0.036  | 0.107 | 0.0045  | 0.873 | 0.0042  | 7.89E-01 | 8286 |
| Obesity-driven GERD    | rs4382592 | t | g | 0.02  | 0.004558 | 0.03  | 8.20E-09 | -0.013 | 2.10E-08 | 0.018  | 0.466 | 0.0014  | 0.962 | 0.0066  | 6.96E-01 | 8361 |

**ST16. Estimation of the genetic heterogeneity in GERD effect sizes on BEEA via the Cochran Q statistics**

| SNPs | outcome       | exposure            | model | Q-statistics | Q-df | Q_pvalue |
|------|---------------|---------------------|-------|--------------|------|----------|
| 88   | BEEA combined | GERD (unstratified) | IVW   | 139.4        | 87   | 0.0003   |
| 46   | BEEA combined | obesity-driven GERD | IVW   | 63.4         | 45   | 0.037    |
| 27   | BEEA combined | functional GERD     | IVW   | 48.9         | 26   | 0.004    |

IVW= Inverse variance weighted model.

Evidence for heterogeneity of effect size is quantified by the Cochran Q statistics, where a Q\_pvalue < 0.05/3 are indicative of potential heterogeneity.

**ST17. Estimation of the genetic association between GERD loci and risk of BE/EA combined adjusting for the genetic association with BMI**

| Exposure                    | Outcome        | nSNPs | <i>Unadjusted estimate</i> |       |          | <i>Adjusted for genetic effect on BMI</i> |       |          |
|-----------------------------|----------------|-------|----------------------------|-------|----------|-------------------------------------------|-------|----------|
|                             |                |       | Beta                       | SE    | pvalue   | Beta                                      | SE    | Pvalue   |
| all GERD loci               | BE/EA combined | 88    | 0.597                      | 0.085 | 4.19E-10 | 0.453                                     | 0.113 | 6.46E-05 |
| depression-driven GERD only | BE/EA combined | 27    | 0.212                      | 0.185 | 0.263    | 0.421                                     | 0.279 | 0.13     |
| obesity-driven GERD only    | BE/EA combined | 46    | 0.726                      | 0.107 | 2.23E-08 | 0.513                                     | 0.161 | 0.00146  |

The conditional analysis was performed by adjusting for the effect of GERD SNPs on BMI in the regression analysis against BE/EA.

**ST18. Lookup on the genetic association of MTAG BE loci on GERD susceptibility**

| Locus number | SNP        | E A | NE A | EAF  | mtag_B E_beta | mtag_B E_se | mtag_B E_z | mtag_BE_p val | An et al. GERD Z | mtag_GE RD_beta | mtag_G ERD_se | mtag_G ERD_z | mtag_GER D_pval |
|--------------|------------|-----|------|------|---------------|-------------|------------|---------------|------------------|-----------------|---------------|--------------|-----------------|
| 1            | rs3072     | T   | C    | 0.63 | -0.113        | 0.016       | -7.14      | 9.29E-13      | -5.59            | -0.021          | 0.005         | -4.20        | 2.63E-05        |
| 1            | rs7255     | T   | C    | 0.45 | 0.107         | 0.015       | 6.95       | 3.75E-12      | 5.03             | 0.019           | 0.005         | 3.88         | 1.07E-04        |
| 1            | rs10199768 | G   | T    | 0.55 | 0.085         | 0.015       | 5.56       | 2.62E-08      | 5.02             | 0.021           | 0.005         | 4.30         | 1.70E-05        |
| 1            | rs520354   | A   | G    | 0.53 | -0.090        | 0.015       | -5.97      | 2.44E-09      | -5.32            | -0.021          | 0.005         | -4.35        | 1.36E-05        |
| 2            | rs17369434 | A   | G    | 0.92 | -0.178        | 0.029       | -6.16      | 7.34E-10      | -4.99            | -0.033          | 0.009         | -3.60        | 3.18E-04        |
| 2            | rs10207635 | A   | T    | 0.87 | -0.136        | 0.022       | -6.18      | 6.34E-10      | -5.04            | -0.027          | 0.007         | -3.86        | 1.15E-04        |
| 3            | rs2861695  | A   | G    | 0.19 | 0.110         | 0.019       | 5.81       | 6.23E-09      | 5.99             | 0.032           | 0.006         | 5.26         | 1.48E-07        |
| 4            | rs1868915  | C   | A    | 0.41 | -0.091        | 0.015       | -5.91      | 3.51E-09      | -2.52            | -0.012          | 0.005         | -2.39        | 1.69E-02        |
| 5            | rs2597301  | C   | G    | 0.31 | 0.119         | 0.016       | 7.32       | 2.56E-13      | 5.73             | 0.023           | 0.005         | 4.32         | 1.53E-05        |
| 5            | rs2077610  | T   | A    | 0.45 | 0.095         | 0.015       | 6.15       | 7.84E-10      | 3.87             | 0.015           | 0.005         | 3.05         | 2.27E-03        |
| 6            | rs10080150 | A   | G    | 0.62 | -0.094        | 0.016       | -6.06      | 1.33E-09      | -5.36            | -0.015          | 0.005         | -3.00        | 2.68E-03        |
| 7            | rs10039754 | A   | G    | 0.45 | -0.085        | 0.015       | -5.65      | 1.63E-08      | -5.19            | -0.017          | 0.005         | -3.43        | 6.03E-04        |
| 8            | rs9393735  | A   | G    | 0.86 | 0.135         | 0.022       | 6.11       | 9.70E-10      | 5.20             | 0.040           | 0.007         | 5.81         | 6.22E-09        |
| 8            | rs12215773 | T   | C    | 0.77 | 0.103         | 0.018       | 5.67       | 1.45E-08      | 6.22             | 0.039           | 0.006         | 6.88         | 5.88E-12        |
| 8            | rs13219181 | A   | G    | 0.81 | 0.107         | 0.020       | 5.44       | 5.23E-08      | 5.66             | 0.035           | 0.006         | 5.68         | 1.32E-08        |
| 8            | rs13195040 | A   | G    | 0.89 | 0.159         | 0.025       | 6.45       | 1.14E-10      | 5.54             | 0.046           | 0.008         | 6.01         | 1.90E-09        |
| 8            | rs200968   | T   | C    | 0.80 | 0.111         | 0.019       | 5.71       | 1.14E-08      | 5.85             | 0.040           | 0.006         | 6.61         | 3.94E-11        |
| 8            | rs7752448  | A   | G    | 0.87 | 0.135         | 0.023       | 5.82       | 5.83E-09      | 5.68             | 0.043           | 0.007         | 5.92         | 3.19E-09        |
| 9            | rs622217   | T   | C    | 0.52 | 0.093         | 0.015       | 6.17       | 6.94E-10      | 4.08             | 0.008           | 0.005         | 1.75         | 8.08E-02        |
| 9            | rs2504930  | T   | C    | 0.20 | -0.107        | 0.019       | -5.75      | 8.95E-09      | -3.47            | -0.014          | 0.006         | -2.28        | 2.25E-02        |
| 10           | rs4841211  | A   | G    | 0.26 | 0.096         | 0.017       | 5.55       | 2.83E-08      | 2.35             | 0.021           | 0.006         | 3.83         | 1.26E-04        |
| 10           | rs10104032 | C   | A    | 0.63 | -0.090        | 0.016       | -5.75      | 8.73E-09      | -2.25            | -0.022          | 0.005         | -4.32        | 1.57E-05        |
| 11           | rs2127128  | C   | T    | 0.33 | 0.088         | 0.016       | 5.49       | 4.07E-08      | 0.91             | 0.010           | 0.005         | 1.97         | 4.84E-02        |
| 11           | rs10108511 | T   | C    | 0.47 | 0.087         | 0.015       | 5.77       | 8.08E-09      | 0.75             | 0.008           | 0.005         | 1.76         | 7.87E-02        |

|    |            |   |   |      |        |       |       |          |       |        |       |       |          |
|----|------------|---|---|------|--------|-------|-------|----------|-------|--------|-------|-------|----------|
| 12 | rs10982622 | A | G | 0.54 | 0.088  | 0.015 | 5.76  | 8.59E-09 | 2.20  | 0.005  | 0.005 | 0.95  | 3.43E-01 |
| 13 | rs11792928 | C | T | 0.71 | -0.098 | 0.017 | -5.89 | 3.85E-09 | -3.67 | -0.021 | 0.005 | -4.02 | 5.93E-05 |
| 14 | rs1247942  | G | C | 0.59 | 0.099  | 0.015 | 6.41  | 1.45E-10 | 2.89  | 0.007  | 0.005 | 1.53  | 1.26E-01 |
| 15 | rs4448948  | A | T | 0.92 | 0.157  | 0.029 | 5.49  | 4.02E-08 | 3.02  | 0.038  | 0.009 | 4.22  | 2.47E-05 |
| 15 | rs739414   | C | T | 0.26 | 0.103  | 0.018 | 5.82  | 5.77E-09 | 3.85  | 0.017  | 0.006 | 3.13  | 1.73E-03 |
| 16 | rs7187365  | T | C | 0.18 | 0.113  | 0.020 | 5.78  | 7.52E-09 | 3.99  | 0.019  | 0.006 | 2.92  | 3.52E-03 |
| 17 | rs12985909 | C | T | 0.45 | 0.086  | 0.015 | 5.61  | 2.03E-08 | 4.98  | 0.031  | 0.005 | 6.31  | 2.81E-10 |
| 17 | rs8102046  | T | G | 0.44 | 0.096  | 0.015 | 6.30  | 2.97E-10 | 4.97  | 0.020  | 0.005 | 4.04  | 5.44E-05 |
| 17 | rs7258722  | T | A | 0.60 | 0.096  | 0.015 | 6.17  | 6.69E-10 | 5.40  | 0.028  | 0.005 | 5.63  | 1.81E-08 |

Pvalues for SNPs that show suggestive evidence for an association with GERD are highlighted in pink.
